# Supplementary material for: Dysregulation of the Acrosome Formation Network by 8-oxoguanine (8-oxoG) in Infertile Sperm: A Case Report with Advanced Techniques
Source: Int J Mol Sci. 2021 May 30;22(11):5857. doi: 10.3390/ijms22115857 (PMC8199233; doi:10.3390/ijms22115857)
Supplement: Supplementary file 1 [file ijms-22-05857-s001.zip]

Archive with 6 entries (6 files):
- ijms-1188060R1_Supple cover page.pdf
- Suppl Figure_01_GSEA_Cell motility.pptx
- Suppl Table_01_C13 OG-seq.xlsx
- Suppl Table_02_C14 OG-seq.xlsx
- Suppl Table_03_2D PAGE spot intensity.xlsx
- Suppl Table_04_Ab.xlsx
