# Supplementary material for: Dysregulation of the Acrosome Formation Network by 8-oxoguanine (8-oxoG) in Infertile Sperm: A Case Report with Advanced Techniques
Source: Int J Mol Sci. 2021 May 30;22(11):5857. doi: 10.3390/ijms22115857 (PMC8199233; doi:10.3390/ijms22115857)
Supplement: Supplementary file 1 [file ijms-22-05857-s001.zip › Suppl Table_01_C13 OG-seq.xlsx]

## Sheet: Supp_01
Supplementary Table 1. Annotation of 8-oxoG loci in C13 sperm DNA
chr	start	end	width	length	abs_summit	pileup	(-)log10(pvalue)	fold_enrichment	(-)log10(qvalue)	MACS_peakID	annotation	geneChr	geneStart	geneEnd	geneLength	geneStrand	geneId	transcriptId	distanceToTSS	ENSEMBL	SYMBOL	GENENAME
chr1	5248531	5248837	307	308	5248614	6	8.34454	5.72209	3.88177	C13_peak_1	Distal Intergenic	1	5447785	5915577	467793	1	533760	NM_001102514	-198948	NA	GRIK1	glutamate ionotropic receptor kainate type subunit 1
chr1	5262278	5262480	203	204	5262436	9	15.3135	8.8115	10.308	C13_peak_2	Distal Intergenic	1	5447785	5915577	467793	1	533760	NM_001102514	-185305	NA	GRIK1	glutamate ionotropic receptor kainate type subunit 1
chr1	29319389	29319611	223	224	29319508	18	20.3761	11.2107	15.0884	C13_peak_3	Distal Intergenic	1	28659456	28972472	313017	2	615745	NM_001122729	-346917	NA	GBE1	1,4-alpha-glucan branching enzyme 1
chr1	31747041	31747260	220	221	31747164	4	5.41506	4.08721	1.49996	C13_peak_4	Distal Intergenic	1	28659456	28972472	313017	2	615745	NM_001122729	-2774569	NA	GBE1	1,4-alpha-glucan branching enzyme 1
chr1	45144696	45144906	211	212	45144838	6	9.844	6.16805	5.23703	C13_peak_5	Distal Intergenic	1	45065846	45078998	13153	1	511959	NM_001101948	78850	ENSBTAG00000004538	ZNF596	zinc finger protein 596
chr1	45730302	45730512	211	212	45730446	5	7.48308	5.11204	3.15338	C13_peak_6	Distal Intergenic	1	45489052	45521372	32321	1	505171	NM_001192976	241250	ENSBTAG00000016363	TFG	TRK-fused gene
chr1	57222378	57222633	256	257	57222482	22	8.08134	3.70309	3.67511	C13_peak_7	Distal Intergenic	1	57227953	57268917	40965	1	522055	NM_001205892	-5320	ENSBTAG00000015065	TMPRSS7	transmembrane protease, serine 7
chr1	57223228	57223485	258	259	57223388	29	21.8665	8.74174	16.4954	C13_peak_8	Distal Intergenic	1	57227953	57268917	40965	1	522055	NM_001205892	-4468	ENSBTAG00000015065	TMPRSS7	transmembrane protease, serine 7
chr1	57460969	57461193	225	226	57461152	13	23.1758	12.3361	17.7065	C13_peak_9	Distal Intergenic	1	57568530	57591078	22549	1	534910	NM_001034620	-107337	ENSBTAG00000033319	CD200	CD200 molecule
chr1	57466167	57466394	228	229	57466358	15	27.2966	14.0984	21.5963	C13_peak_10	Distal Intergenic	1	57568530	57591078	22549	1	534910	NM_001034620	-102136	ENSBTAG00000033319	CD200	CD200 molecule
chr1	57553305	57553511	207	208	57553393	11	7.6045	5.07444	3.26542	C13_peak_11	Distal Intergenic	1	57568530	57591078	22549	1	534910	NM_001034620	-15019	ENSBTAG00000033319	CD200	CD200 molecule
chr1	144101550	144101756	207	208	144101746	8	13.4429	7.93035	8.55374	C13_peak_12	Distal Intergenic	1	144067290	144071071	3782	2	517889	NM_001114509	-30479	ENSBTAG00000021276	TFF3	trefoil factor 3
chr1	144127424	144127819	396	397	144127586	4	6.47818	4.40575	2.22468	C13_peak_13	Distal Intergenic	1	144176745	144180011	3267	2	616105	NM_001083521	52192	ENSBTAG00000030814	TFF2	trefoil factor 2
chr1	145293963	145294223	261	262	145294206	37	57.1805	25.7502	50.2489	C13_peak_14	Distal Intergenic	1	145154624	145178774	24151	1	512069	NM_001046108	139339	ENSBTAG00000017010	FAM207A	family with sequence similarity 207 member A
chr1	145295226	145295434	209	210	145295315	24	11.1062	4.70127	6.43804	C13_peak_15	Distal Intergenic	1	145154624	145178774	24151	1	512069	NM_001046108	140602	ENSBTAG00000017010	FAM207A	family with sequence similarity 207 member A
chr1	145305684	145305887	204	205	145305870	16	16.7667	9.5871	11.7069	C13_peak_16	Distal Intergenic	1	145154624	145178774	24151	1	512069	NM_001046108	151060	ENSBTAG00000017010	FAM207A	family with sequence similarity 207 member A
chr1	145307989	145308292	304	305	145308251	18	22.7461	12.5269	17.3345	C13_peak_17	Distal Intergenic	1	145154624	145178774	24151	1	512069	NM_001046108	153365	ENSBTAG00000017010	FAM207A	family with sequence similarity 207 member A
chr1	145328507	145328696	190	191	145328647	19	17.7426	9.36013	12.6109	C13_peak_18	Distal Intergenic	1	145154624	145178774	24151	1	512069	NM_001046108	173883	ENSBTAG00000017010	FAM207A	family with sequence similarity 207 member A
chr1	145332678	145332901	224	225	145332758	40	23.418	6.99226	17.9324	C13_peak_19	Distal Intergenic	1	145154624	145178774	24151	1	512069	NM_001046108	178054	ENSBTAG00000017010	FAM207A	family with sequence similarity 207 member A
chr1	145335187	145335390	204	205	145335268	17	17.4463	9.74179	12.323	C13_peak_20	Distal Intergenic	1	145154624	145178774	24151	1	512069	NM_001046108	180563	ENSBTAG00000017010	FAM207A	family with sequence similarity 207 member A
chr1	145342816	145343095	280	281	145342898	22	23.2817	11.772	17.8039	C13_peak_21	Distal Intergenic	1	145154624	145178774	24151	1	512069	NM_001046108	188192	ENSBTAG00000017010	FAM207A	family with sequence similarity 207 member A
chr1	145347805	145348131	327	328	145347894	28	29.759	13.5421	23.9534	C13_peak_22	Distal Intergenic	1	145154624	145178774	24151	1	512069	NM_001046108	193181	ENSBTAG00000017010	FAM207A	family with sequence similarity 207 member A
chr1	145351457	145351799	343	344	145351642	36	48.6819	21.4888	42.0421	C13_peak_23	Distal Intergenic	1	145154624	145178774	24151	1	512069	NM_001046108	196833	ENSBTAG00000017010	FAM207A	family with sequence similarity 207 member A
chr1	145364073	145364395	323	324	145364185	29	14.5521	5.39001	9.61198	C13_peak_24	Distal Intergenic	1	145154624	145178774	24151	1	512069	NM_001046108	209449	ENSBTAG00000017010	FAM207A	family with sequence similarity 207 member A
chr1	145367071	145367524	454	455	145367148	25	26.4938	12.6831	20.8716	C13_peak_25	Distal Intergenic	1	145154624	145178774	24151	1	512069	NM_001046108	212447	ENSBTAG00000017010	FAM207A	family with sequence similarity 207 member A
chr1	145369326	145369736	411	412	145369407	20	20.1225	10.5	14.8446	C13_peak_26a	Distal Intergenic	1	145154624	145178774	24151	1	512069	NM_001046108	214702	ENSBTAG00000017010	FAM207A	family with sequence similarity 207 member A
chr1	145369326	145369736	411	412	145369698	11	8.86095	5.86318	4.37177	C13_peak_26b	Distal Intergenic	1	145154624	145178774	24151	1	512069	NM_001046108	214702	ENSBTAG00000017010	FAM207A	family with sequence similarity 207 member A
chr1	145385172	145385648	477	478	145385588	12	10.5053	6.69087	5.86879	C13_peak_27	Distal Intergenic	1	145597292	145610047	12756	2	404083	NM_205782	224399	ENSBTAG00000007818	POFUT2	protein O-fucosyltransferase 2
chr1	145387189	145387392	204	205	145387308	39	20.5318	6.12219	15.2398	C13_peak_28	Distal Intergenic	1	145597292	145610047	12756	2	404083	NM_205782	222655	ENSBTAG00000007818	POFUT2	protein O-fucosyltransferase 2
chr1	145397677	145398154	478	479	145397766	18	14.5425	7.71088	9.60258	C13_peak_29a	Distal Intergenic	1	145597292	145610047	12756	2	404083	NM_205782	211893	ENSBTAG00000007818	POFUT2	protein O-fucosyltransferase 2
chr1	145397677	145398154	478	479	145398122	15	16.4292	9.61089	11.3828	C13_peak_29b	Distal Intergenic	1	145597292	145610047	12756	2	404083	NM_205782	211893	ENSBTAG00000007818	POFUT2	protein O-fucosyltransferase 2
chr1	145401520	145401758	239	240	145401742	25	30.8644	15.259	25.0226	C13_peak_30	Distal Intergenic	1	145597292	145610047	12756	2	404083	NM_205782	208289	ENSBTAG00000007818	POFUT2	protein O-fucosyltransferase 2
chr1	145442561	145442815	255	256	145442789	32	34.3365	14.7075	28.3372	C13_peak_31	Distal Intergenic	1	145597292	145610047	12756	2	404083	NM_205782	167232	ENSBTAG00000007818	POFUT2	protein O-fucosyltransferase 2
chr1	145450418	145450621	204	205	145450503	22	21.7684	10.8624	16.4075	C13_peak_32	Distal Intergenic	1	145597292	145610047	12756	2	404083	NM_205782	159426	ENSBTAG00000007818	POFUT2	protein O-fucosyltransferase 2
chr1	153216242	153216534	293	294	153216338	9	10.9986	7.28748	6.33761	C13_peak_33	Distal Intergenic	1	153233567	153320510	86944	1	507414	NM_001100314	-17033	ENSBTAG00000020787	PIK3R4	phosphoinositide-3-kinase regulatory subunit 4
chr10	28473090	28473506	417	418	28473405	9	15.3135	8.8115	10.308	C13_peak_34	Intron (NM_001199064/540295, intron 1 of 9)	10	28459345	28509712	50368	1	540295	NM_001199064	13745	ENSBTAG00000006413	KATNBL1	katanin regulatory subunit B1 like 1
chr10	39689221	39689431	211	212	39689356	9	14.6627	8.64304	9.71962	C13_peak_35	Distal Intergenic	10	39735366	39736135	770	2	538748	NM_001205401	46704	ENSBTAG00000024582	RPL10L	ribosomal protein L10 like
chr10	39689643	39690139	497	498	39689721	15	24.0298	13.1484	18.516	C13_peak_36a	Distal Intergenic	10	39735366	39736135	770	2	538748	NM_001205401	45996	ENSBTAG00000024582	RPL10L	ribosomal protein L10 like
chr10	39689643	39690139	497	498	39690094	15	19.1034	11.06	13.9146	C13_peak_36b	Distal Intergenic	10	39735366	39736135	770	2	538748	NM_001205401	45996	ENSBTAG00000024582	RPL10L	ribosomal protein L10 like
chr10	59505083	59505441	359	360	59505154	5	8.1278	5.2869	3.67511	C13_peak_37	Distal Intergenic	10	59313775	59314272	498	1	790811	NM_001143743	191308	NA	BOLA	MHC class I antigen
chr11	27306598	27306788	191	192	27306701	19	27.3373	14.6731	21.6366	C13_peak_38	Distal Intergenic	11	27260022	27263699	3678	2	539492	NM_001205678	-42899	ENSBTAG00000004159	SIX2	SIX homeobox 2
chr11	27309072	27309335	264	265	27309179	11	18.7114	10.4569	13.5395	C13_peak_39	Distal Intergenic	11	27260022	27263699	3678	2	539492	NM_001205678	-45373	ENSBTAG00000004159	SIX2	SIX homeobox 2
chr11	70168283	70168477	195	196	70168392	9	12.7106	8.0119	7.91401	C13_peak_40	Distal Intergenic	11	69688036	69702229	14194	2	780856	NM_001079793	-466054	ENSBTAG00000023744	YPEL5	yippee like 5
chr11	74042512	74042701	190	191	74042647	9	11.6005	7.56094	6.86593	C13_peak_41	Intron (NM_001206502/359716, intron 3 of 19)	11	73977000	73977079	80	1	100313397	NR_030823	65512	ENSBTAG00000038848	MIR1301	microRNA 1301
chr11	79833380	79833590	211	212	79833432	5	8.1278	5.2869	3.67511	C13_peak_42	Distal Intergenic	11	79487139	79494239	7101	1	539430	NM_001076916	346241	ENSBTAG00000008113	OSR1	odd-skipped related transciption factor 1
chr11	80491393	80491602	210	211	80491500	7	10.2997	6.67493	5.67052	C13_peak_43	Distal Intergenic	11	80261889	80266803	4915	1	505949	NM_001075233	229504	ENSBTAG00000023928	RDH14	retinol dehydrogenase 14 (all-trans/9-cis/11-cis)
chr11	80502956	80503164	209	210	80503065	6	9.844	6.16805	5.23703	C13_peak_44	Distal Intergenic	11	80261889	80266803	4915	1	505949	NM_001075233	241067	ENSBTAG00000023928	RDH14	retinol dehydrogenase 14 (all-trans/9-cis/11-cis)
chr11	80517546	80517741	196	197	80517631	20	23.6385	12.5749	18.1457	C13_peak_45	Distal Intergenic	11	80261889	80266803	4915	1	505949	NM_001075233	255657	ENSBTAG00000023928	RDH14	retinol dehydrogenase 14 (all-trans/9-cis/11-cis)
chr11	83565425	83565636	212	213	83565513	4	6.25392	4.3481	2.18436	C13_peak_46	Distal Intergenic	11	83655860	83659066	3207	2	539071	NM_001034659	93430	ENSBTAG00000004948	FAM84A	family with sequence similarity 84 member A
chr11	85352235	85352437	203	204	85352346	4	5.41506	4.08721	1.49996	C13_peak_47	Distal Intergenic	11	85205522	85233638	28117	2	352960	NM_178317	-118597	ENSBTAG00000016045	TRIB2	tribbles pseudokinase 2
chr11	98146038	98146227	190	191	98146125	9	14.2303	8.52006	9.30725	C13_peak_48	Distal Intergenic	11	98161639	98170670	9032	1	282867	NM_201528	-15412	ENSBTAG00000006957	SLC2A8	solute carrier family 2 member 8
chr11	98152396	98152589	194	195	98152532	4	6.47818	4.40575	2.22468	C13_peak_49	Distal Intergenic	11	98161639	98170670	9032	1	282867	NM_201528	-9050	ENSBTAG00000006957	SLC2A8	solute carrier family 2 member 8
chr11	99118007	99118199	193	194	99118087	8	13.4429	7.93035	8.55374	C13_peak_50	Distal Intergenic	11	99131533	99179458	47926	1	540108	NM_001114156	-13334	ENSBTAG00000015327	SPTAN1	spectrin alpha, non-erythrocytic 1
chr11	107285144	107285465	322	323	107285314	74	28.9694	4.92014	23.2087	C13_peak_51	Distal Intergenic	11	107260745	107261718	974	1	282255	NM_181867	24399	ENSBTAG00000019015	IFITM3	interferon induced transmembrane protein 3 (1-8U)
chr11	107300830	107301021	192	193	107300877	8	5.2152	4.02722	1.32622	C13_peak_52	Distal Intergenic	11	107260745	107261718	974	1	282255	NM_181867	40085	ENSBTAG00000019015	IFITM3	interferon induced transmembrane protein 3 (1-8U)
chr12	28623325	28623551	227	228	28623412	5	7.14433	5.00619	2.84228	C13_peak_53	Intron (NM_001046574/616069, intron 1 of 4)	12	28612076	28634686	22611	1	616069	NM_001046574	11249	ENSBTAG00000000993	N4BP2L1	NEDD4 binding protein 2 like 1
chr12	33156978	33157206	229	230	33157070	4	5.1952	4.00595	1.30664	C13_peak_54	3' UTR	12	33156437	33186087	29651	2	540674	NM_001193013	28881	ENSBTAG00000014619	WASF3	WAS protein family member 3
chr12	34349540	34350055	516	517	34349615	13	22.3159	12.1151	16.9267	C13_peak_55a	Distal Intergenic	12	34177959	34197924	19966	1	540589	NM_001192750	171581	ENSBTAG00000003116	MTMR6	myotubularin related protein 6
chr12	34349540	34350055	516	517	34349990	8	11.1043	7.21071	6.43618	C13_peak_55b	Distal Intergenic	12	34177959	34197924	19966	1	540589	NM_001192750	171581	ENSBTAG00000003116	MTMR6	myotubularin related protein 6
chr12	79834783	79835393	611	612	79834900	22	34.637	17.7227	28.6207	C13_peak_56	Intron (NM_001193099/616045, intron 51 of 52)	12	79691579	79870108	178530	2	616045	NM_001193099	34715	ENSBTAG00000010395	DOCK9	dedicator of cytokinesis 9
chr12	84200585	84200787	203	204	84200633	4	6.14372	4.318	2.09944	C13_peak_57	Distal Intergenic	12	83099334	83115415	16082	1	513822	NM_001014922	1101251	ENSBTAG00000001344	METTL21E	RIKEN cDNA 4832428D23-like
chr13	10754635	10755089	455	456	10754805	17	23.6851	13.1175	18.1874	C13_peak_58a	Distal Intergenic	13	10760673	10763288	2616	1	613456	NM_001037484	-5584	ENSBTAG00000000516	OTOR	otoraplin
chr13	10754635	10755089	455	456	10755057	24	44.2681	21.3001	37.8214	C13_peak_58b	Distal Intergenic	13	10760673	10763288	2616	1	613456	NM_001037484	-5584	ENSBTAG00000000516	OTOR	otoraplin
chr13	16325282	16325653	372	373	16325355	7	11.618	7.0492	6.86593	C13_peak_59	Intron (NM_001102516/534787, intron 5 of 13)	13	16278275	16404468	126194	1	534787	NM_001102516	47007	ENSBTAG00000013004	ITIH5	inter-alpha-trypsin inhibitor heavy chain family member 5
chr13	48077003	48077439	437	438	48077145	12	14.8372	9.14305	9.88521	C13_peak_60	Distal Intergenic	13	47908389	47915709	7321	2	282431	NM_174640	-161294	ENSBTAG00000015872	PROKR2	prokineticin receptor 2
chr13	48081935	48082126	192	193	48082009	22	42.4798	20.2665	36.0927	C13_peak_61	Distal Intergenic	13	47908389	47915709	7321	2	282431	NM_174640	-166226	ENSBTAG00000015872	PROKR2	prokineticin receptor 2
chr13	49014856	49015047	192	193	49014943	6	6.66111	5.01063	2.39487	C13_peak_62	Distal Intergenic	13	48617012	48665879	48868	2	524427	NM_001206179	-348977	ENSBTAG00000020465	FERMT1	fermitin family member 1
chr13	49021021	49021220	200	201	49021101	9	14.89	8.70408	9.93141	C13_peak_63	Distal Intergenic	13	48617012	48665879	48868	2	524427	NM_001206179	-355142	ENSBTAG00000020465	FERMT1	fermitin family member 1
chr13	57392845	57393033	189	190	57392936	4	6.47818	4.40575	2.22468	C13_peak_64	Distal Intergenic	13	57207491	57217578	10088	2	515071	NM_001102019	-175267	NA	PHACTR3	phosphatase and actin regulator 3
chr13	83070326	83070831	506	507	83070404	12	11.4158	7.24613	6.72696	C13_peak_65	Distal Intergenic	13	82651610	82804448	152839	1	530813	NM_001075939	418716	NA	DOK5	docking protein 5
chr14	443421	443728	308	309	443527	32	11.4841	3.96623	6.79241	C13_peak_66	Distal Intergenic	14	1487366	1489409	2044	1	513585	NM_001046153	-1043638	ENSBTAG00000000879	C14H8orf33	chromosome 14 open reading frame, human C8orf33
chr14	491888	492102	215	216	491990	29	18.6079	7.14106	13.4392	C13_peak_67	Distal Intergenic	14	1487366	1489409	2044	1	513585	NM_001046153	-995264	ENSBTAG00000000879	C14H8orf33	chromosome 14 open reading frame, human C8orf33
chr14	583488	583913	426	427	583564	29	14.3134	5.29557	9.38873	C13_peak_68a	Distal Intergenic	14	1487366	1489409	2044	1	513585	NM_001046153	-903453	ENSBTAG00000000879	C14H8orf33	chromosome 14 open reading frame, human C8orf33
chr14	583488	583913	426	427	583819	28	20.5474	8.33345	15.2551	C13_peak_68b	Distal Intergenic	14	1487366	1489409	2044	1	513585	NM_001046153	-903453	ENSBTAG00000000879	C14H8orf33	chromosome 14 open reading frame, human C8orf33
chr14	635313	635584	272	273	635363	9	5.29244	3.93934	1.39875	C13_peak_69	Distal Intergenic	14	1487366	1489409	2044	1	513585	NM_001046153	-851782	ENSBTAG00000000879	C14H8orf33	chromosome 14 open reading frame, human C8orf33
chr14	660729	661036	308	309	660925	12	9.8572	6.28925	5.24973	C13_peak_70	Distal Intergenic	14	1487366	1489409	2044	1	513585	NM_001046153	-826330	ENSBTAG00000000879	C14H8orf33	chromosome 14 open reading frame, human C8orf33
chr14	2189427	2189854	428	429	2189703	26	20.2962	8.7537	15.0109	C13_peak_71	Distal Intergenic	14	2164999	2177242	12244	1	512824	NM_001046133	24428	ENSBTAG00000037493	PUF60	poly(U) binding splicing factor 60
chr14	33405054	33405310	257	258	33405235	50	16.1309	3.89771	11.097	C13_peak_72	Intron (NM_173997/281022, intron 32 of 38)	14	33343882	33480410	136529	2	281022	NM_173997	75100	ENSBTAG00000014691	ARFGEF1	ADP ribosylation factor guanine nucleotide exchange factor 1
chr14	33405583	33405812	230	231	33405692	40	19.7065	5.70949	14.4508	C13_peak_73	Intron (NM_173997/281022, intron 32 of 38)	14	33343882	33480410	136529	2	281022	NM_173997	74598	ENSBTAG00000014691	ARFGEF1	ADP ribosylation factor guanine nucleotide exchange factor 1
chr14	40547154	40547452	299	300	40547304	5	8.1278	5.2869	3.67511	C13_peak_74	Distal Intergenic	14	40420996	40471465	50470	1	536186	NM_001101165	126158	ENSBTAG00000004411	CRISPLD1	cysteine rich secretory protein LCCL domain containing 1
chr14	43042247	43042764	518	519	43042387	8	9.09795	6.3298	4.59337	C13_peak_75	Distal Intergenic	14	42315038	42330314	15277	2	512677	NM_001100348	-711933	ENSBTAG00000003885	PEX2	peroxisomal biogenesis factor 2
chr14	43043596	43043792	197	198	43043676	9	9.40357	6.46865	4.88523	C13_peak_76	Distal Intergenic	14	42315038	42330314	15277	2	512677	NM_001100348	-713282	ENSBTAG00000003885	PEX2	peroxisomal biogenesis factor 2
chr14	43044333	43044808	476	477	43044472	14	7.48539	4.46778	3.1556	C13_peak_77	Distal Intergenic	14	42315038	42330314	15277	2	512677	NM_001100348	-714019	ENSBTAG00000003885	PEX2	peroxisomal biogenesis factor 2
chr15	30885748	30885977	230	231	30885959	13	23.1758	12.3361	17.7065	C13_peak_78	Distal Intergenic	15	30743500	30811461	67962	2	533492	NM_001206022	-74287	ENSBTAG00000015939	PVRL1	poliovirus receptor-related 1 (herpesvirus entry mediator C)
chr15	47654275	47654509	235	236	47654332	4	6.3633	4.37681	2.22468	C13_peak_79	Distal Intergenic	15	47420310	47454587	34278	1	508334	NM_001102491	233965	NA	FAM160A2	family with sequence similarity 160 member A2
chr15	59003850	59004075	226	227	59004036	4	5.1952	4.00595	1.30664	C13_peak_80	Promoter (<=1kb)	15	58994222	59004197	9976	2	510125	NM_001075431	122	ENSBTAG00000001460	LIN7C	lin-7 homolog C, crumbs cell polarity complex component
chr15	59094352	59094541	190	191	59094439	4	5.99168	4.27449	1.97283	C13_peak_81	Distal Intergenic	15	58994222	59004197	9976	2	510125	NM_001075431	-90155	ENSBTAG00000001460	LIN7C	lin-7 homolog C, crumbs cell polarity complex component
chr15	71059956	71060571	616	617	71060091	20	31.2969	16.3513	25.4383	C13_peak_82a	Distal Intergenic	15	72466675	72475916	9242	1	534309	NM_001076019	-1406104	ENSBTAG00000037580	MSANTD3	Myb/SANT DNA binding domain containing 3
chr15	71059956	71060571	616	617	71060501	8	8.0686	5.7828	3.67511	C13_peak_82b	Distal Intergenic	15	72466675	72475916	9242	1	534309	NM_001076019	-1406104	ENSBTAG00000037580	MSANTD3	Myb/SANT DNA binding domain containing 3
chr15	71063577	71063947	371	372	71063933	10	13.8482	8.61559	8.94582	C13_peak_83	Distal Intergenic	15	72466675	72475916	9242	1	534309	NM_001076019	-1402728	ENSBTAG00000037580	MSANTD3	Myb/SANT DNA binding domain containing 3
chr15	82601612	82601936	325	326	82601705	5	7.48308	5.11204	3.15338	C13_peak_84	Distal Intergenic	15	82373578	82375216	1639	1	613525	NM_001164092	228034	NA	SELENOH	selenoprotein H
chr16	10675849	10676043	195	196	10676020	12	19.8449	11.1047	14.5833	C13_peak_85	Distal Intergenic	16	9511460	9514186	2727	2	613499	NM_001078034	-1161663	ENSBTAG00000018361	R3HDM2	R3H domain containing 2
chr16	13667855	13668327	473	474	13667942	18	6.32311	3.36862	2.22468	C13_peak_86	Distal Intergenic	16	13744181	13774629	30449	2	613624	NM_001192971	106302	ENSBTAG00000013064	RGS18	regulator of G-protein signaling 18
chr16	13804670	13804925	256	257	13804816	19	21.5415	11.6305	16.19	C13_peak_87	Distal Intergenic	16	13744181	13774629	30449	2	613624	NM_001192971	-30041	ENSBTAG00000013064	RGS18	regulator of G-protein signaling 18
chr16	19162182	19162432	251	252	19162260	28	56.2347	25.5534	49.3429	C13_peak_88	Distal Intergenic	16	19500370	19572455	72086	1	505221	NM_001191424	-337938	ENSBTAG00000006186	KCTD3	potassium channel tetramerization domain containing 3
chr16	32721138	32721337	200	201	32721277	4	6.47818	4.40575	2.22468	C13_peak_89	Distal Intergenic	16	32961371	33072297	110927	2	615715	NM_001101247	350960	ENSBTAG00000024555	EFCAB2	EF-hand calcium binding domain 2
chr16	38683201	38683427	227	228	38683249	8	5.19876	4.01657	1.30998	C13_peak_90	Distal Intergenic	16	38568049	38586028	17980	1	521303	NM_001192536	115152	ENSBTAG00000021298	METTL11B	methyltransferase like 11B
chr16	58661224	58661415	192	193	58661354	5	7.47221	5.10879	3.15052	C13_peak_91	Intron (NM_001103256/519896, intron 5 of 19)	16	58600656	58838844	238189	2	519896	NM_001103256	177429	ENSBTAG00000031385	RFWD2	ring finger and WD repeat domain 2
chr16	66763192	66763383	192	193	66763307	8	12.8928	7.78825	8.08685	C13_peak_92	Distal Intergenic	16	66581062	66610926	29865	1	614118	NM_001076312	182130	ENSBTAG00000016369	TSEN15	tRNA splicing endonuclease subunit 15
chr17	9727601	9727796	196	197	9727760	8	13.4429	7.93035	8.55374	C13_peak_93	Distal Intergenic	17	9742222	10173557	431336	1	537614	NM_001191349	-14426	ENSBTAG00000027182	NR3C2	nuclear receptor subfamily 3 group C member 2
chr17	35645147	35645351	205	206	35645304	32	7.90871	2.94025	3.54404	C13_peak_94	Distal Intergenic	17	35618070	35622863	4794	1	280822	NM_180997	27077	ENSBTAG00000020883	IL2	interleukin 2
chr17	44423629	44423883	255	256	44423718	4	6.10619	4.30748	2.07198	C13_peak_95	Distal Intergenic	17	44377630	44394268	16639	2	530397	NM_001046313	-29361	ENSBTAG00000011062	TDO2	tryptophan 2,3-dioxygenase
chr18	12646555	12646755	201	202	12646746	7	11.618	7.0492	6.86593	C13_peak_96	Distal Intergenic	18	12422846	12425239	2394	1	507300	NM_001193072	223709	ENSBTAG00000012465	FOXC2	forkhead box C2
chr18	33454852	33455056	205	206	33454935	16	17.9396	10.2697	12.8006	C13_peak_97	Distal Intergenic	18	32798824	32888927	90104	2	785475	NM_001081624	-565925	ENSBTAG00000032092	CDH11	cadherin 11
chr19	35469531	35469728	198	199	35469659	5	8.1278	5.2869	3.67511	C13_peak_98	Distal Intergenic	19	35473576	35486422	12847	2	616992	NM_001206262	16694	ENSBTAG00000030820	NT5M	5',3'-nucleotidase, mitochondrial
chr19	61931127	61931547	421	422	61931261	7	11.618	7.0492	6.86593	C13_peak_99	Distal Intergenic	19	61708769	61814973	106205	2	286883	NM_001034045	-116154	ENSBTAG00000001609	MAP2K6	mitogen-activated protein kinase kinase 6
chr2	10084459	10084677	219	220	10084503	4	5.41506	4.08721	1.49996	C13_peak_100	Distal Intergenic	2	9849224	9870250	21027	2	535102	NM_001046394	-214209	ENSBTAG00000021762	ZC3H15	zinc finger CCCH-type containing 15
chr2	27698365	27698561	197	198	27698457	7	11.618	7.0492	6.86593	C13_peak_101	Intron (NM_001193132/616901, intron 9 of 9)	2	27407917	27758923	351007	2	616901	NM_001193132	60362	ENSBTAG00000044179	CERS6	ceramide synthase 6
chr2	41871901	41872094	194	195	41872019	5	6.12457	4.62331	2.08273	C13_peak_102	Intron (NM_001076886/532545, intron 4 of 12)	2	41361137	41491255	130119	2	526088	NM_001192624	-380646	ENSBTAG00000006159	KCNJ3	potassium voltage-gated channel subfamily J member 3
chr2	100163890	100164090	201	202	100163983	12	13.9496	8.68817	9.04138	C13_peak_103	Distal Intergenic	2	98758036	98898492	140457	1	510506	NM_001192258	1405854	ENSBTAG00000016662	CPS1	carbamoyl-phosphate synthase 1
chr2	100164677	100165191	515	516	100164840	12	13.9496	8.68817	9.04138	C13_peak_104	Distal Intergenic	2	98758036	98898492	140457	1	510506	NM_001192258	1406641	ENSBTAG00000016662	CPS1	carbamoyl-phosphate synthase 1
chr20	38725195	38725390	196	197	38725274	4	5.66188	4.17183	1.712	C13_peak_105	Distal Intergenic	20	39073246	39137480	64235	1	281422	NM_001039726	-347856	ENSBTAG00000025035	PRLR	prolactin receptor
chr21	19878020	19878456	437	438	19878113	7	11.618	7.0492	6.86593	C13_peak_106	Intron (NM_001035078/509816, intron 3 of 5)	21	19867700	19898711	31012	1	509816	NM_001035078	10320	ENSBTAG00000019831	MRPS11	mitochondrial ribosomal protein S11
chr21	56325731	56326149	419	420	56326035	6	9.844	6.16805	5.23703	C13_peak_107	Intron (NM_001206201/615161, intron 13 of 13)	21	56048403	56400900	352498	2	615161	NM_001206201	74751	ENSBTAG00000017216	FRMD5	FERM domain containing 5
chr21	56332080	56332315	236	237	56332305	11	19.175	10.5738	13.9441	C13_peak_108	Intron (NM_001206201/615161, intron 13 of 13)	21	56048403	56400900	352498	2	615161	NM_001206201	68585	ENSBTAG00000017216	FRMD5	FERM domain containing 5
chr22	2874915	2875278	364	365	2875086	4	6.47818	4.40575	2.22468	C13_peak_109	Distal Intergenic	22	2766407	2807380	40974	2	767932	NM_001077005	-67535	ENSBTAG00000004117	AZI2	5-azacytidine induced 2
chr22	36289773	36289978	206	207	36289874	4	6.26869	4.35204	2.18436	C13_peak_110	Distal Intergenic	22	36876904	37038527	161624	1	537051	NM_001206573	-586926	ENSBTAG00000003165	ADAMTS9	ADAM metallopeptidase with thrombospondin type 1 motif 9
chr22	37927640	37927828	189	190	37927735	4	5.93389	4.25733	1.9323	C13_peak_111	Intron (NM_001046506/613433, intron 2 of 4)	22	37867702	37884070	16369	2	768326	NM_001078138	-43570	ENSBTAG00000013026	SNTN	sentan, cilia apical structure protein
chr22	37932579	37932770	192	193	37932720	7	11.618	7.0492	6.86593	C13_peak_112	Intron (NM_001046506/613433, intron 2 of 4)	22	37867702	37884070	16369	2	768326	NM_001078138	-48509	ENSBTAG00000013026	SNTN	sentan, cilia apical structure protein
chr22	42402755	42403106	352	353	42402953	18	23.0708	12.6981	17.6447	C13_peak_113	Distal Intergenic	22	43354328	43359047	4720	1	538515	NM_001083488	-951222	ENSBTAG00000046763	FAM107A	family with sequence similarity 107 member A
chr22	42419896	42420088	193	194	42419977	10	17.2254	9.69266	12.1106	C13_peak_114	Distal Intergenic	22	43354328	43359047	4720	1	538515	NM_001083488	-934240	ENSBTAG00000046763	FAM107A	family with sequence similarity 107 member A
chr22	42428067	42428359	293	294	42428261	8	12.1633	7.575	7.39098	C13_peak_115	Distal Intergenic	22	43354328	43359047	4720	1	538515	NM_001083488	-925969	ENSBTAG00000046763	FAM107A	family with sequence similarity 107 member A
chr22	42436185	42436577	393	394	42436270	12	16.1079	9.73968	11.0744	C13_peak_116	Distal Intergenic	22	43354328	43359047	4720	1	538515	NM_001083488	-917751	ENSBTAG00000046763	FAM107A	family with sequence similarity 107 member A
chr22	45492660	45493202	543	544	45493089	11	13.6534	8.58965	8.75676	C13_peak_117	Intron (NM_001102195/537173, intron 7 of 9)	22	45094510	45555747	461238	1	537173	NM_001102195	398150	ENSBTAG00000010029	ERC2	ELKS/RAB6-interacting/CAST family member 2
chr22	53155508	53155713	206	207	53155643	7	11.618	7.0492	6.86593	C13_peak_118	Distal Intergenic	22	53110763	53147115	36353	1	617519	NM_001076466	44745	ENSBTAG00000011311	CCDC12	coiled-coil domain containing 12
chr22	53649378	53649613	236	237	53649539	13	23.1758	12.3361	17.7065	C13_peak_119	Distal Intergenic	22	53613211	53614323	1113	2	539002	NM_001194959	-35055	ENSBTAG00000013586	CCR2	C-C motif chemokine receptor 2
chr22	53672741	53672973	233	234	53672942	7	11.618	7.0492	6.86593	C13_peak_120	Distal Intergenic	22	53613211	53614323	1113	2	539002	NM_001194959	-58418	ENSBTAG00000013586	CCR2	C-C motif chemokine receptor 2
chr22	53684089	53684305	217	218	53684212	7	11.618	7.0492	6.86593	C13_peak_121	Distal Intergenic	22	53613211	53614323	1113	2	539002	NM_001194959	-69766	ENSBTAG00000013586	CCR2	C-C motif chemokine receptor 2
chr22	56459081	56459269	189	190	56459184	4	6.47818	4.40575	2.22468	C13_peak_122	Intron (NM_001079774/514330, intron 4 of 7)	22	56434755	56487000	52246	2	514330	NM_001079774	27731	ENSBTAG00000003328	TAMM41	TAM41 mitochondrial translocator assembly and maintenance homolog
chr24	8670235	8670485	251	252	8670331	18	27.9118	14.9259	22.1901	C13_peak_123	Distal Intergenic	24	8748241	8785476	37236	1	615687	NM_001102289	-77756	ENSBTAG00000007567	TMX3	thioredoxin related transmembrane protein 3
chr24	9174241	9174433	193	194	9174316	4	5.41506	4.08721	1.49996	C13_peak_124	Distal Intergenic	24	8748241	8785476	37236	1	615687	NM_001102289	426000	ENSBTAG00000007567	TMX3	thioredoxin related transmembrane protein 3
chr24	48491977	48492367	391	392	48492077	8	13.1335	7.85233	8.31433	C13_peak_125a	Distal Intergenic	24	47971045	48022060	51016	2	516010	NM_001046218	-469917	ENSBTAG00000039916	SMAD2	SMAD family member 2
chr24	48491977	48492367	391	392	48492263	8	13.0475	7.82978	8.236	C13_peak_125b	Distal Intergenic	24	47971045	48022060	51016	2	516010	NM_001046218	-469917	ENSBTAG00000039916	SMAD2	SMAD family member 2
chr25	4827191	4827482	292	293	4827354	13	18.9456	10.998	13.7607	C13_peak_126	Distal Intergenic	25	5417264	6686802	1269539	1	521304	NM_001075818	-589782	ENSBTAG00000007210	RBFOX1	RNA binding protein, fox-1 homolog 1
chr25	18896447	18896788	342	343	18896554	6	9.844	6.16805	5.23703	C13_peak_127	Distal Intergenic	25	18826142	18835490	9349	1	508417	NM_001205637	70305	ENSBTAG00000018559	LYRM1	LYR motif containing 1
chr25	18901639	18901841	203	204	18901771	6	9.844	6.16805	5.23703	C13_peak_128	Distal Intergenic	25	18826142	18835490	9349	1	508417	NM_001205637	75497	ENSBTAG00000018559	LYRM1	LYR motif containing 1
chr25	18903126	18903612	487	488	18903413	6	9.844	6.16805	5.23703	C13_peak_129	Distal Intergenic	25	18826142	18835490	9349	1	508417	NM_001205637	76984	ENSBTAG00000018559	LYRM1	LYR motif containing 1
chr25	18915167	18915376	210	211	18915257	9	15.3135	8.8115	10.308	C13_peak_130	Distal Intergenic	25	18826142	18835490	9349	1	508417	NM_001205637	89025	ENSBTAG00000018559	LYRM1	LYR motif containing 1
chr25	18928976	18929180	205	206	18929170	8	13.4429	7.93035	8.55374	C13_peak_131	Distal Intergenic	25	18826142	18835490	9349	1	508417	NM_001205637	102834	ENSBTAG00000018559	LYRM1	LYR motif containing 1
chr25	18935358	18935851	494	495	18935441	8	12.4694	7.66805	7.68382	C13_peak_132	Distal Intergenic	25	18826142	18835490	9349	1	508417	NM_001205637	109216	ENSBTAG00000018559	LYRM1	LYR motif containing 1
chr25	19044476	19044676	201	202	19044656	9	11.2884	7.42169	6.6063	C13_peak_133	Distal Intergenic	25	19141197	19142589	1393	1	538444	NM_001038564	-96521	ENSBTAG00000020959	SET	SET nuclear proto-oncogene
chr25	30306632	30307087	456	457	30306938	8	13.4429	7.93035	8.55374	C13_peak_134	Distal Intergenic	25	29391800	29824281	432482	2	505622	NM_001192067	-482351	ENSBTAG00000008718	WBSCR17	Williams-Beuren syndrome chromosome region 17
chr25	30332369	30332809	441	442	30332678	9	15.3135	8.8115	10.308	C13_peak_135	Distal Intergenic	25	29391800	29824281	432482	2	505622	NM_001192067	-508088	ENSBTAG00000008718	WBSCR17	Williams-Beuren syndrome chromosome region 17
chr25	36121446	36121658	213	214	36121561	12	14.5245	8.98622	9.58492	C13_peak_136	Distal Intergenic	25	36057472	36065405	7934	1	514996	NM_001193255	63974	ENSBTAG00000000342	PLOD3	procollagen-lysine,2-oxoglutarate 5-dioxygenase 3
chr25	36122903	36123221	319	320	36123109	16	23.2976	12.9655	17.8185	C13_peak_137	Distal Intergenic	25	36180838	36185662	4825	2	768053	NM_001077110	62441	ENSBTAG00000014468	AP1S1	adaptor related protein complex 1 sigma 1 subunit
chr26	17970845	17971178	334	335	17970934	16	9.32002	5.13946	4.80502	C13_peak_138	Distal Intergenic	26	17712946	17774060	61115	2	614147	NM_001193217	-196785	ENSBTAG00000016298	TM9SF3	transmembrane 9 superfamily member 3
chr26	23355131	23355406	276	277	23355213	51	113.207	45.8198	103.781	C13_peak_139	Intron (NM_001098083/535067, intron 2 of 10)	26	23535846	23549572	13727	1	782444	NM_001191476	-180440	ENSBTAG00000021071	TRIM8	tripartite motif containing 8
chr26	31790757	31790991	235	236	31790844	4	5.41506	4.08721	1.49996	C13_peak_140	Intron (NM_001101943/511417, intron 1 of 8)	26	31762792	31849701	86910	1	511417	NM_001101943	27965	ENSBTAG00000007709	SHOC2	SHOC2, leucine rich repeat scaffold protein
chr26	40478653	40479013	361	362	40478945	9	15.3135	8.8115	10.308	C13_peak_141	Distal Intergenic	26	40346540	40380689	34150	1	508557	NM_001192959	132113	ENSBTAG00000007441	SEC23IP	SEC23 interacting protein
chr26	46909539	46909750	212	213	46909622	11	19.175	10.5738	13.9441	C13_peak_142	Distal Intergenic	26	47184667	47184731	65	2	100313465	NR_031168	274981	NA	MIR2285C	microRNA 2285c
chr26	47090472	47090677	206	207	47090656	7	11.618	7.0492	6.86593	C13_peak_143	Distal Intergenic	26	47184667	47184731	65	2	100313465	NR_031168	94054	NA	MIR2285C	microRNA 2285c
chr27	629172	629364	193	194	629354	11	19.175	10.5738	13.9441	C13_peak_144	Distal Intergenic	27	312538	376195	63658	1	524077	NM_001038140	316634	ENSBTAG00000009387	MYOM2	myomesin 2
chr27	6697128	6697388	261	262	6697227	7	11.618	7.0492	6.86593	C13_peak_145	Intron (NM_001075744/516722, intron 2 of 6)	27	6674973	6683937	8965	2	497023	NM_001011677	-13191	ENSBTAG00000014141	SPATA4	spermatogenesis associated 4
chr27	7205620	7205982	363	364	7205689	6	9.844	6.16805	5.23703	C13_peak_146	Distal Intergenic	27	6999517	7084944	85428	2	282122	NM_174488	-120676	ENSBTAG00000014737	VEGFC	vascular endothelial growth factor C
chr27	25153277	25153488	212	213	25153354	14	21.7557	12.185	16.3951	C13_peak_147	Distal Intergenic	27	25391016	25416076	25061	2	515461	NM_001076856	262588	ENSBTAG00000013579	SARAF	store-operated calcium entry associated regulatory factor
chr27	26327083	26327284	202	203	26327224	11	19.175	10.5738	13.9441	C13_peak_148	Intron (NM_001143857/505061, intron 17 of 33)	27	26263003	26449795	186793	1	505061	NM_001143857	64080	ENSBTAG00000021592	WRN	Werner syndrome RecQ like helicase
chr27	26337726	26337956	231	232	26337812	9	13.1826	8.18288	8.35979	C13_peak_149	Intron (NM_001143857/505061, intron 17 of 33)	27	26263003	26449795	186793	1	505061	NM_001143857	74723	ENSBTAG00000021592	WRN	Werner syndrome RecQ like helicase
chr27	26342113	26342349	237	238	26342209	10	15.4386	9.18906	10.4283	C13_peak_150	Intron (NM_001143857/505061, intron 17 of 33)	27	26263003	26449795	186793	1	505061	NM_001143857	79110	ENSBTAG00000021592	WRN	Werner syndrome RecQ like helicase
chr27	26359015	26359253	239	240	26359126	11	16.1943	9.67022	11.1585	C13_peak_151	Intron (NM_001143857/505061, intron 17 of 33)	27	26263003	26449795	186793	1	505061	NM_001143857	96012	ENSBTAG00000021592	WRN	Werner syndrome RecQ like helicase
chr27	26366311	26366529	219	220	26366404	17	23.1908	12.8845	17.72	C13_peak_152	Intron (NM_001143857/505061, intron 17 of 33)	27	26263003	26449795	186793	1	505061	NM_001143857	103308	ENSBTAG00000021592	WRN	Werner syndrome RecQ like helicase
chr27	26386866	26387063	198	199	26386979	11	17.4241	10.088	12.302	C13_peak_153	Intron (NM_001143857/505061, intron 17 of 33)	27	26263003	26449795	186793	1	505061	NM_001143857	123863	ENSBTAG00000021592	WRN	Werner syndrome RecQ like helicase
chr27	28460603	28460884	282	283	28460872	6	8.69321	5.84056	4.21083	C13_peak_154	Intron (NM_001101920/510037, intron 5 of 5)	27	28415994	28427209	11216	2	535350	NM_001099069	-33394	ENSBTAG00000015463	TTI2	TELO2 interacting protein 2
chr27	28537683	28537881	199	200	28537810	11	12.6734	8.09543	7.87979	C13_peak_155	Intron (NM_001101920/510037, intron 5 of 5)	27	28415994	28427209	11216	2	535350	NM_001099069	-110474	ENSBTAG00000015463	TTI2	TELO2 interacting protein 2
chr27	28578782	28578971	190	191	28578870	6	7.28222	5.30061	2.97069	C13_peak_156	Intron (NM_001101920/510037, intron 5 of 5)	27	28415994	28427209	11216	2	535350	NM_001099069	-151573	ENSBTAG00000015463	TTI2	TELO2 interacting protein 2
chr27	28590602	28590898	297	298	28590721	8	13.1709	7.86203	8.34863	C13_peak_157	Intron (NM_001101920/510037, intron 5 of 5)	27	28415994	28427209	11216	2	535350	NM_001099069	-163393	ENSBTAG00000015463	TTI2	TELO2 interacting protein 2
chr27	28611740	28611943	204	205	28611924	11	10.7002	6.98848	6.05795	C13_peak_158	Intron (NM_001101920/510037, intron 5 of 5)	27	28415994	28427209	11216	2	535350	NM_001099069	-184531	ENSBTAG00000015463	TTI2	TELO2 interacting protein 2
chr27	28642916	28643165	250	251	28642998	6	6.66111	5.01063	2.39487	C13_peak_159	Intron (NM_001101920/510037, intron 5 of 5)	27	28415994	28427209	11216	2	535350	NM_001099069	-215707	ENSBTAG00000015463	TTI2	TELO2 interacting protein 2
chr27	28663564	28663907	344	345	28663647	15	24.3975	13.2718	18.8684	C13_peak_160	Intron (NM_001101920/510037, intron 5 of 5)	27	28415994	28427209	11216	2	535350	NM_001099069	-236355	ENSBTAG00000015463	TTI2	TELO2 interacting protein 2
chr27	28679046	28679442	397	398	28679163	12	12.5282	7.9019	7.74019	C13_peak_161	Intron (NM_001101920/510037, intron 5 of 5)	27	28415994	28427209	11216	2	535350	NM_001099069	-251837	ENSBTAG00000015463	TTI2	TELO2 interacting protein 2
chr27	28731360	28731550	191	192	28731448	12	8.31687	5.32954	3.85678	C13_peak_162	Intron (NM_001101920/510037, intron 5 of 5)	27	28449633	28947295	497663	2	510037	NM_001101920	215745	ENSBTAG00000016411	RNF122	ring finger protein 122
chr27	28779786	28780010	225	226	28779976	11	8.3447	5.53946	3.88177	C13_peak_163	Intron (NM_001101920/510037, intron 5 of 5)	27	28449633	28947295	497663	2	510037	NM_001101920	167285	ENSBTAG00000016411	RNF122	ring finger protein 122
chr27	28783400	28783590	191	192	28783481	9	12.7619	8.03106	7.96139	C13_peak_164	Intron (NM_001101920/510037, intron 5 of 5)	27	28449633	28947295	497663	2	510037	NM_001101920	163705	ENSBTAG00000016411	RNF122	ring finger protein 122
chr27	28833243	28833439	197	198	28833330	6	9.844	6.16805	5.23703	C13_peak_165	Intron (NM_001101920/510037, intron 5 of 5)	27	28449633	28947295	497663	2	510037	NM_001101920	113856	ENSBTAG00000016411	RNF122	ring finger protein 122
chr27	28937398	28937617	220	221	28937476	15	27.2966	14.0984	21.5963	C13_peak_166	Intron (NM_001101920/510037, intron 5 of 5)	27	28449633	28947295	497663	2	510037	NM_001101920	9678	ENSBTAG00000016411	RNF122	ring finger protein 122
chr27	30565830	30566233	404	405	30565911	21	36.3826	18.2917	30.3076	C13_peak_167a	Intron (NM_001192518/520004, intron 1 of 16)	27	30421577	31075903	654327	1	520004	NM_001192518	144253	ENSBTAG00000010241	UNC5D	unc-5 netrin receptor D
chr27	30565830	30566233	404	405	30566139	12	13.6842	8.54643	8.78532	C13_peak_167b	Intron (NM_001192518/520004, intron 1 of 16)	27	30421577	31075903	654327	1	520004	NM_001192518	144253	ENSBTAG00000010241	UNC5D	unc-5 netrin receptor D
chr27	37568449	37568637	189	190	37568505	4	6.47818	4.40575	2.22468	C13_peak_168	Distal Intergenic	27	37487662	37521134	33473	2	534094	NM_001099061	-47315	ENSBTAG00000025003	INTS10	integrator complex subunit 10
chr27	37601957	37602234	278	279	37602097	7	10.7541	6.81605	6.10439	C13_peak_169	Distal Intergenic	27	37487662	37521134	33473	2	534094	NM_001099061	-80823	ENSBTAG00000025003	INTS10	integrator complex subunit 10
chr27	37611780	37612027	248	249	37611976	13	23.1758	12.3361	17.7065	C13_peak_170	Distal Intergenic	27	37487662	37521134	33473	2	534094	NM_001099061	-90646	ENSBTAG00000025003	INTS10	integrator complex subunit 10
chr27	37639274	37639623	350	351	37639536	5	8.1278	5.2869	3.67511	C13_peak_171	Distal Intergenic	27	37487662	37521134	33473	2	534094	NM_001099061	-118140	ENSBTAG00000025003	INTS10	integrator complex subunit 10
chr27	43567622	43567860	239	240	43567744	13	22.5808	12.1857	17.1758	C13_peak_172	Distal Intergenic	27	42558021	42569249	11229	1	784326	NM_001191190	1009601	ENSBTAG00000047930	UBE2E2	ubiquitin-conjugating enzyme E2E 2
chr28	1894471	1894866	396	397	1894768	58	28.8568	6.19165	23.0979	C13_peak_173	Distal Intergenic	28	2167761	2177307	9547	2	781044	NM_001098147	282441	ENSBTAG00000018691	RHOU	ras homolog family member U
chr28	2642105	2642301	197	198	2642159	7	6.76167	5.08634	2.49261	C13_peak_174	Distal Intergenic	28	3039643	3076691	37049	2	533927	NM_001076006	434390	ENSBTAG00000047434	TSNAX	translin associated factor X
chr28	7069383	7069610	228	229	7069428	4	6.47818	4.40575	2.22468	C13_peak_175	Intron (NM_001192935/538365, intron 3 of 7)	28	7230219	7238729	8511	1	768072	NM_001206643	-160609	NA	COA6	cytochrome c oxidase assembly factor 6 homolog (S. cerevisiae)
chr28	26760372	26760619	248	249	26760420	4	6.24065	4.34453	2.17654	C13_peak_176	Distal Intergenic	28	26764785	26786028	21244	1	782397	NM_001191149	-4166	ENSBTAG00000019124	EIF4EBP2	eukaryotic translation initiation factor 4E binding protein 2
chr28	31998672	31998881	210	211	31998765	5	8.1278	5.2869	3.67511	C13_peak_177	Distal Intergenic	28	31170965	31173042	2078	2	514949	NM_001105368	-825630	ENSBTAG00000012977	COMTD1	catechol-O-methyltransferase domain containing 1
chr28	39353634	39354160	527	528	39353766	7	11.618	7.0492	6.86593	C13_peak_178	Distal Intergenic	28	39435546	39448964	13419	1	404143	NM_001034052	-81386	ENSBTAG00000032829	GHITM	growth hormone inducible transmembrane protein
chr28	40137781	40137970	190	191	40137869	5	7.4246	5.09448	3.10536	C13_peak_179	Distal Intergenic	28	39531571	39542180	10610	1	280911	NM_175775	606210	ENSBTAG00000015681	RGR	retinal G protein coupled receptor
chr28	40139653	40139873	221	222	40139770	8	12.3204	7.62341	7.54156	C13_peak_180	Distal Intergenic	28	39531571	39542180	10610	1	280911	NM_175775	608082	ENSBTAG00000015681	RGR	retinal G protein coupled receptor
chr28	40140649	40141032	384	385	40140779	25	20.7989	9.33024	15.4956	C13_peak_181	Distal Intergenic	28	39531571	39542180	10610	1	280911	NM_175775	609078	ENSBTAG00000015681	RGR	retinal G protein coupled receptor
chr28	43081001	43081199	199	200	43081103	5	7.87555	5.22245	3.51294	C13_peak_182	Distal Intergenic	28	43160797	43196195	35399	1	539941	NM_001192974	-79598	ENSBTAG00000007876	MAPK8	mitogen-activated protein kinase 8
chr29	195972	196171	200	201	196065	16	13.7477	7.75869	8.84767	C13_peak_183	Distal Intergenic	29	590732	644582	53851	2	528169	NM_001245925	448411	ENSBTAG00000012010	PANX1	pannexin 1
chr29	19400878	19401083	206	207	19400959	9	15.3135	8.8115	10.308	C13_peak_184	Distal Intergenic	29	18684328	18780241	95914	1	533729	NM_001076898	716550	ENSBTAG00000010191	PAK1	p21 (RAC1) activated kinase 1
chr29	19406585	19407153	569	570	19406843	6	8.01309	5.60053	3.64069	C13_peak_185	Distal Intergenic	29	18684328	18780241	95914	1	533729	NM_001076898	722257	ENSBTAG00000010191	PAK1	p21 (RAC1) activated kinase 1
chr29	19408268	19408697	430	431	19408631	14	11.9878	7.17074	7.21983	C13_peak_186	Distal Intergenic	29	18684328	18780241	95914	1	533729	NM_001076898	723940	ENSBTAG00000010191	PAK1	p21 (RAC1) activated kinase 1
chr29	19409470	19409781	312	313	19409563	6	8.7077	5.84528	4.22455	C13_peak_187	Distal Intergenic	29	18684328	18780241	95914	1	533729	NM_001076898	725142	ENSBTAG00000010191	PAK1	p21 (RAC1) activated kinase 1
chr29	19416072	19416498	427	428	19416416	11	9.62547	6.33808	5.09205	C13_peak_188	Distal Intergenic	29	18684328	18780241	95914	1	533729	NM_001076898	731744	ENSBTAG00000010191	PAK1	p21 (RAC1) activated kinase 1
chr29	30263890	30264092	203	204	30264062	40	34.7316	11.947	28.7108	C13_peak_189	Intron (NM_001078085/618028, intron 13 of 14)	29	30073042	30112565	39524	1	404163	NM_205806	190848	ENSBTAG00000016506	ST3GAL4	ST3 beta-galactoside alpha-2,3-sialyltransferase 4
chr29	30275397	30275627	231	232	30275469	18	21.3037	11.7387	15.9633	C13_peak_190	Intron (NM_001078085/618028, intron 13 of 14)	29	30073042	30112565	39524	1	404163	NM_205806	202355	ENSBTAG00000016506	ST3GAL4	ST3 beta-galactoside alpha-2,3-sialyltransferase 4
chr29	30281375	30281894	520	521	30281466	39	17.278	5.06431	12.1606	C13_peak_191a	Intron (NM_001078085/618028, intron 13 of 14)	29	30073042	30112565	39524	1	404163	NM_205806	208333	ENSBTAG00000016506	ST3GAL4	ST3 beta-galactoside alpha-2,3-sialyltransferase 4
chr29	30281375	30281894	520	521	30281877	22	8.50633	3.87331	4.0359	C13_peak_191b	Intron (NM_001078085/618028, intron 13 of 14)	29	30073042	30112565	39524	1	404163	NM_205806	208333	ENSBTAG00000016506	ST3GAL4	ST3 beta-galactoside alpha-2,3-sialyltransferase 4
chr29	30289474	30289672	199	200	30289549	23	27.5774	13.9885	21.8702	C13_peak_192	Intron (NM_001078085/618028, intron 13 of 14)	29	30073042	30112565	39524	1	404163	NM_205806	216432	ENSBTAG00000016506	ST3GAL4	ST3 beta-galactoside alpha-2,3-sialyltransferase 4
chr29	30303534	30303781	248	249	30303614	27	32.2358	15.3815	26.3154	C13_peak_193	Intron (NM_001078085/618028, intron 13 of 14)	29	30073042	30112565	39524	1	404163	NM_205806	230492	ENSBTAG00000016506	ST3GAL4	ST3 beta-galactoside alpha-2,3-sialyltransferase 4
chr29	30323435	30323859	425	426	30323558	19	19.2281	10.2588	13.9916	C13_peak_194a	Intron (NM_001078085/618028, intron 13 of 14)	29	30073042	30112565	39524	1	404163	NM_205806	250393	ENSBTAG00000016506	ST3GAL4	ST3 beta-galactoside alpha-2,3-sialyltransferase 4
chr29	30323435	30323859	425	426	30323753	20	17.9177	9.16891	12.779	C13_peak_194b	Intron (NM_001078085/618028, intron 13 of 14)	29	30073042	30112565	39524	1	404163	NM_205806	250393	ENSBTAG00000016506	ST3GAL4	ST3 beta-galactoside alpha-2,3-sialyltransferase 4
chr29	30330433	30330721	289	290	30330580	13	12.2434	7.54998	7.46978	C13_peak_195	Intron (NM_001078085/618028, intron 13 of 14)	29	30073042	30112565	39524	1	404163	NM_205806	257391	ENSBTAG00000016506	ST3GAL4	ST3 beta-galactoside alpha-2,3-sialyltransferase 4
chr29	30348467	30348678	212	213	30348548	20	23.9042	12.726	18.3992	C13_peak_196	Intron (NM_001078085/618028, intron 13 of 14)	29	30073042	30112565	39524	1	404163	NM_205806	275425	ENSBTAG00000016506	ST3GAL4	ST3 beta-galactoside alpha-2,3-sialyltransferase 4
chr29	30351997	30352243	247	248	30352122	46	63.8396	25.8401	56.7105	C13_peak_197	Intron (NM_001078085/618028, intron 13 of 14)	29	30073042	30112565	39524	1	404163	NM_205806	278955	ENSBTAG00000016506	ST3GAL4	ST3 beta-galactoside alpha-2,3-sialyltransferase 4
chr29	30385238	30385489	252	253	30385390	8	11.4798	7.34758	6.78846	C13_peak_198	Intron (NM_001078085/618028, intron 13 of 14)	29	30073042	30112565	39524	1	404163	NM_205806	312196	ENSBTAG00000016506	ST3GAL4	ST3 beta-galactoside alpha-2,3-sialyltransferase 4
chr29	30968247	30968757	511	512	30968406	16	21.2162	12.015	15.8808	C13_peak_199	Distal Intergenic	29	30128060	30886851	758792	2	618028	NM_001078085	-81396	ENSBTAG00000006804	KIRREL3	kin of IRRE like 3 (Drosophila)
chr29	31046705	31046927	223	224	31046850	11	19.175	10.5738	13.9441	C13_peak_200	Distal Intergenic	29	30128060	30886851	758792	2	618028	NM_001078085	-159854	ENSBTAG00000006804	KIRREL3	kin of IRRE like 3 (Drosophila)
chr3	1019146	1019455	310	311	1019225	10	17.2254	9.69266	12.1106	C13_peak_201	Distal Intergenic	3	930875	1012734	81860	2	539387	NM_001076158	-6412	ENSBTAG00000002823	MPZL1	myelin protein zero like 1
chr3	1025417	1025900	484	485	1025857	6	9.844	6.16805	5.23703	C13_peak_202	Distal Intergenic	3	930875	1012734	81860	2	539387	NM_001076158	-12683	ENSBTAG00000002823	MPZL1	myelin protein zero like 1
chr3	1030687	1030879	193	194	1030761	11	19.175	10.5738	13.9441	C13_peak_203	Distal Intergenic	3	930875	1012734	81860	2	539387	NM_001076158	-17953	ENSBTAG00000002823	MPZL1	myelin protein zero like 1
chr3	1037596	1037938	343	344	1037661	5	8.1278	5.2869	3.67511	C13_peak_204	Distal Intergenic	3	930875	1012734	81860	2	539387	NM_001076158	-24862	ENSBTAG00000002823	MPZL1	myelin protein zero like 1
chr3	13918340	13918537	198	199	13918477	10	14.0681	8.70236	9.15522	C13_peak_205	Distal Intergenic	3	13973123	13985542	12420	2	511219	NM_001105357	67005	ENSBTAG00000012348	LRRC71	leucine rich repeat containing 71
chr3	13921379	13921597	219	220	13921508	6	9.844	6.16805	5.23703	C13_peak_206	Distal Intergenic	3	13973123	13985542	12420	2	511219	NM_001105357	63945	ENSBTAG00000012348	LRRC71	leucine rich repeat containing 71
chr3	13925363	13925723	361	362	13925446	11	19.175	10.5738	13.9441	C13_peak_207	Distal Intergenic	3	13973123	13985542	12420	2	511219	NM_001105357	59819	ENSBTAG00000012348	LRRC71	leucine rich repeat containing 71
chr3	32651671	32651896	226	227	32651871	17	30.7562	15.6674	24.9261	C13_peak_208	Distal Intergenic	3	32598406	32637230	38825	2	505040	NM_001034232	-14441	ENSBTAG00000006466	CD53	CD53 molecule
chr3	78863053	78863604	552	553	78863144	14	20.1454	11.5649	14.8655	C13_peak_209a	Distal Intergenic	3	78849545	78852524	2980	1	613480	NM_001206131	13508	NA	INSL5	insulin like 5
chr3	78863053	78863604	552	553	78863510	12	13.6842	8.54643	8.78532	C13_peak_209b	Distal Intergenic	3	78849545	78852524	2980	1	613480	NM_001206131	13508	NA	INSL5	insulin like 5
chr3	82724641	82724845	205	206	82724738	8	13.4429	7.93035	8.55374	C13_peak_210	Distal Intergenic	3	82486867	82545184	58318	2	510138	NM_001075432	-179457	ENSBTAG00000030706	ALG6	ALG6, alpha-1,3-glucosyltransferase
chr3	82780161	82780425	265	266	82780280	6	7.26421	5.29266	2.95409	C13_peak_211	Distal Intergenic	3	82486867	82545184	58318	2	510138	NM_001075432	-234977	ENSBTAG00000030706	ALG6	ALG6, alpha-1,3-glucosyltransferase
chr3	91886193	91886417	225	226	91886286	17	16.8513	9.38412	11.7882	C13_peak_212	Distal Intergenic	3	91901853	91911965	10113	2	615670	NM_001193084	25548	ENSBTAG00000013241	BSND	barttin CLCNK type accessory beta subunit
chr4	11299041	11299583	543	544	11299133	15	27.2966	14.0984	21.5963	C13_peak_213a	Distal Intergenic	4	11162347	11176872	14526	2	616526	NM_001099157	-122169	ENSBTAG00000003424	BET1	Bet1 golgi vesicular membrane trafficking protein
chr4	11299041	11299583	543	544	11299359	11	19.175	10.5738	13.9441	C13_peak_213b	Distal Intergenic	4	11162347	11176872	14526	2	616526	NM_001099157	-122169	ENSBTAG00000003424	BET1	Bet1 golgi vesicular membrane trafficking protein
chr4	11308096	11308294	199	200	11308240	8	13.4429	7.93035	8.55374	C13_peak_214	Distal Intergenic	4	11162347	11176872	14526	2	616526	NM_001099157	-131224	ENSBTAG00000003424	BET1	Bet1 golgi vesicular membrane trafficking protein
chr4	12626613	12626823	211	212	12626713	15	16.8916	9.87435	11.8263	C13_peak_215	Intron (NM_001192864/535831, intron 1 of 4)	4	12597838	12699701	101864	1	535831	NM_001192864	28775	ENSBTAG00000018185	ASB4	ankyrin repeat and SOCS box containing 4
chr4	27749445	27749655	211	212	27749532	8	13.4429	7.93035	8.55374	C13_peak_216	Distal Intergenic	4	27853326	27855320	1995	2	782170	NM_001191145	105665	ENSBTAG00000046922	TWIST1	twist family bHLH transcription factor 1
chr4	28985545	28985850	306	307	28985753	4	6.47818	4.40575	2.22468	C13_peak_217	Distal Intergenic	4	29124581	29216280	91700	1	536286	NM_001192875	-138731	ENSBTAG00000003709	ITGB8	integrin subunit beta 8
chr4	28986799	28987058	260	261	28986938	12	17.235	10.2124	12.1191	C13_peak_218	Distal Intergenic	4	29124581	29216280	91700	1	536286	NM_001192875	-137523	ENSBTAG00000003709	ITGB8	integrin subunit beta 8
chr4	28991278	28991511	234	235	28991481	17	31.5228	15.8607	25.6342	C13_peak_219	Distal Intergenic	4	29124581	29216280	91700	1	536286	NM_001192875	-133070	ENSBTAG00000003709	ITGB8	integrin subunit beta 8
chr4	28993778	28994033	256	257	28993885	4	6.47818	4.40575	2.22468	C13_peak_220	Distal Intergenic	4	29124581	29216280	91700	1	536286	NM_001192875	-130548	ENSBTAG00000003709	ITGB8	integrin subunit beta 8
chr4	30633553	30633794	242	243	30633648	8	13.3246	7.90108	8.49748	C13_peak_221	Distal Intergenic	4	30796235	30839424	43190	2	514631	NM_001104977	205630	ENSBTAG00000004976	CDCA7L	cell division cycle associated 7 like
chr4	30638601	30638888	288	289	30638796	37	33.6657	12.4199	27.6986	C13_peak_222	Distal Intergenic	4	30796235	30839424	43190	2	514631	NM_001104977	200536	ENSBTAG00000004976	CDCA7L	cell division cycle associated 7 like
chr4	33567754	33567961	208	209	33567921	9	15.3135	8.8115	10.308	C13_peak_223	Intron (NM_001046238/518313, intron 1 of 21)	4	33518953	33763022	244070	1	518313	NM_001046238	48801	ENSBTAG00000004023	KIAA1324L	KIAA1324 like
chr4	35243465	35243674	210	211	35243588	9	13.1584	8.17441	8.3364	C13_peak_224	Distal Intergenic	4	35563538	35789896	226359	1	536417	NM_001206096	-319864	ENSBTAG00000024394	SEMA3D	semaphorin 3D
chr4	35245059	35245335	277	278	35245149	9	15.3135	8.8115	10.308	C13_peak_225	Distal Intergenic	4	35563538	35789896	226359	1	536417	NM_001206096	-318203	ENSBTAG00000024394	SEMA3D	semaphorin 3D
chr4	35246998	35247223	226	227	35247085	6	9.844	6.16805	5.23703	C13_peak_226	Distal Intergenic	4	35563538	35789896	226359	1	536417	NM_001206096	-316315	ENSBTAG00000024394	SEMA3D	semaphorin 3D
chr4	35259824	35260028	205	206	35259912	11	19.175	10.5738	13.9441	C13_peak_227	Distal Intergenic	4	35563538	35789896	226359	1	536417	NM_001206096	-303510	ENSBTAG00000024394	SEMA3D	semaphorin 3D
chr4	35725465	35725655	191	192	35725515	4	5.9429	4.26003	1.9323	C13_peak_228	Intron (NM_001206096/536417, intron 8 of 18)	4	35563538	35789896	226359	1	536417	NM_001206096	161927	ENSBTAG00000024394	SEMA3D	semaphorin 3D
chr4	41477530	41477868	339	340	41477626	7	10.7541	6.81605	6.10439	C13_peak_229	Distal Intergenic	4	41160158	41266152	105995	2	281790	NM_174324	-211378	ENSBTAG00000002714	GNAI1	G protein subunit alpha i1
chr4	41485354	41485721	368	369	41485415	6	9.844	6.16805	5.23703	C13_peak_230	Distal Intergenic	4	41160158	41266152	105995	2	281790	NM_174324	-219202	ENSBTAG00000002714	GNAI1	G protein subunit alpha i1
chr4	46197031	46197220	190	191	46197138	8	13.4429	7.93035	8.55374	C13_peak_231	Intron (NM_001104984/520147, intron 1 of 2)	4	46474531	46565717	91187	1	539121	NM_001082451	-277311	ENSBTAG00000009207	KMT2E	lysine methyltransferase 2E
chr4	46198177	46198370	194	195	46198267	6	7.74795	5.49686	3.40017	C13_peak_232	Intron (NM_001104984/520147, intron 1 of 2)	4	46474531	46565717	91187	1	539121	NM_001082451	-276161	ENSBTAG00000009207	KMT2E	lysine methyltransferase 2E
chr4	50881852	50882058	207	208	50881957	5	7.81798	5.20704	3.46397	C13_peak_233	Distal Intergenic	4	50778374	50799331	20958	1	100335800	NM_001281911	103478	ENSBTAG00000036154	TARP	TCR gamma alternate reading frame protein
chr4	51994312	51994669	358	359	51994531	14	12.7233	7.62287	7.92597	C13_peak_234	Intron (NM_001012999/280855, intron 20 of 21)	4	51912651	52042198	129548	2	280855	NM_001012999	47529	ENSBTAG00000006161	MET	MET proto-oncogene, receptor tyrosine kinase
chr4	57399658	57399888	231	232	57399747	12	17.8301	10.4404	12.6949	C13_peak_235	Distal Intergenic	4	56459731	56517537	57807	1	541075	NM_001078031	939927	ENSBTAG00000021967	TMEM168	transmembrane protein 168
chr4	57416225	57416604	380	381	57416454	4	5.71777	4.19005	1.76076	C13_peak_236	Distal Intergenic	4	56459731	56517537	57807	1	541075	NM_001078031	956494	ENSBTAG00000021967	TMEM168	transmembrane protein 168
chr4	64027403	64027754	352	353	64027688	12	16.7538	10.0172	11.6968	C13_peak_237	Intron (NM_001192853/535387, intron 18 of 21)	4	63649808	64105542	455735	2	535387	NM_001192853	77788	ENSBTAG00000006528	BBS9	Bardet-Biedl syndrome 9
chr4	66534988	66535217	230	231	66535073	10	17.2254	9.69266	12.1106	C13_peak_238	Distal Intergenic	4	66362577	66453938	91362	2	615645	NM_001105443	-81050	ENSBTAG00000000260	ZNRF2	zinc and ring finger 2
chr4	66536172	66536601	430	431	66536479	7	8.9292	6.16441	4.4343	C13_peak_239	Distal Intergenic	4	66362577	66453938	91362	2	615645	NM_001105443	-82234	ENSBTAG00000000260	ZNRF2	zinc and ring finger 2
chr4	66543732	66543987	256	257	66543943	9	15.3135	8.8115	10.308	C13_peak_240	Distal Intergenic	4	66362577	66453938	91362	2	615645	NM_001105443	-89794	ENSBTAG00000000260	ZNRF2	zinc and ring finger 2
chr4	66548499	66548691	193	194	66548593	8	10.411	6.93496	5.77721	C13_peak_241	Distal Intergenic	4	66362577	66453938	91362	2	615645	NM_001105443	-94561	ENSBTAG00000000260	ZNRF2	zinc and ring finger 2
chr4	81711776	81712005	230	231	81711875	24	26.7883	13.2043	21.1402	C13_peak_242	Intron (NM_001205431/511147, intron 7 of 13)	4	81642481	81644523	2043	1	509064	NM_001075389	69295	ENSBTAG00000018715	MPLKIP	M-phase specific PLK1 interacting protein
chr4	95732673	95732869	197	198	95732785	4	5.66188	4.17183	1.712	C13_peak_243	Distal Intergenic	4	95807761	96016758	208998	1	508844	NM_001097999	-74892	ENSBTAG00000010437	MKLN1	muskelin 1
chr4	103660612	103660894	283	284	103660846	25	46.6097	22.2005	40.0519	C13_peak_244	Intron (NM_001193208/540792, intron 6 of 17)	4	103715432	103719743	4312	1	767923	NM_001076997	-54538	NA	FMC1	formation of mitochondrial complex V assembly factor 1 homolog
chr4	103662193	103662478	286	287	103662369	13	20.1456	11.4442	14.8655	C13_peak_245	Intron (NM_001193208/540792, intron 6 of 17)	4	103715432	103719743	4312	1	767923	NM_001076997	-52954	NA	FMC1	formation of mitochondrial complex V assembly factor 1 homolog
chr4	103662862	103663213	352	353	103663104	9	9.59585	6.57418	5.06461	C13_peak_246	Intron (NM_001193208/540792, intron 6 of 17)	4	103715432	103719743	4312	1	767923	NM_001076997	-52219	NA	FMC1	formation of mitochondrial complex V assembly factor 1 homolog
chr4	104861499	104861719	221	222	104861588	5	8.11072	5.28269	3.67511	C13_peak_247	Distal Intergenic	4	104850911	104856529	5619	1	327713	NM_175828	10588	ENSBTAG00000021759	NDUFB2	NADH:ubiquinone oxidoreductase subunit B2
chr4	120820788	120821184	397	398	120821160	16	28.2413	14.6812	22.5145	C13_peak_248	Distal Intergenic	4	120427002	120496083	69082	2	790124	NM_001206781	-324705	ENSBTAG00000037649	VIPR2	vasoactive intestinal peptide receptor 2
chr5	23871665	23871861	197	198	23871709	4	6.17553	4.32681	2.12363	C13_peak_249	Distal Intergenic	5	24072282	24224562	152281	1	518168	NM_001192481	-200421	ENSBTAG00000011245	PLXNC1	plexin C1
chr5	103556439	103556646	208	209	103556597	6	7.0483	5.19518	2.75727	C13_peak_250	Distal Intergenic	5	103530556	103547919	17364	2	514832	NM_001046183	-8520	ENSBTAG00000010490	PEX5	peroxisomal biogenesis factor 5
chr5	104802185	104802431	247	248	104802371	7	6.77367	5.09317	2.50305	C13_peak_251	Distal Intergenic	5	104603432	104727429	123998	1	280958	NM_001205308	198753	ENSBTAG00000012265	VWF	von Willebrand factor
chr5	114135326	114135540	215	216	114135524	22	35.4779	18.0611	29.426	C13_peak_252	Distal Intergenic	5	114009261	114024523	15263	2	515773	NM_001103250	-110803	ENSBTAG00000016516	CYB5R3	cytochrome b5 reductase 3
chr5	114151911	114152113	203	204	114152025	13	13.6466	8.38329	8.75066	C13_peak_253	Distal Intergenic	5	114009261	114024523	15263	2	515773	NM_001103250	-127388	ENSBTAG00000016516	CYB5R3	cytochrome b5 reductase 3
chr5	114199111	114199325	215	216	114199213	23	21.6732	10.4787	16.3159	C13_peak_254	Distal Intergenic	5	114291724	114341661	49938	2	532778	NM_001075974	142336	ENSBTAG00000001057	ARFGAP3	ADP ribosylation factor GTPase activating protein 3
chr5	114212394	114212657	264	265	114212536	4	6.47818	4.40575	2.22468	C13_peak_255	Distal Intergenic	5	114291724	114341661	49938	2	532778	NM_001075974	129004	ENSBTAG00000001057	ARFGAP3	ADP ribosylation factor GTPase activating protein 3
chr6	1616175	1616382	208	209	1616268	4	6.47818	4.40575	2.22468	C13_peak_256	Distal Intergenic	6	1947847	2082068	134222	1	617247	NM_001193149	-331465	ENSBTAG00000044082	2018-03-01	membrane associated ring-CH-type finger 1
chr6	5906987	5907250	264	265	5907071	10	5.92105	4.18795	1.9323	C13_peak_257	Distal Intergenic	6	6013172	6020466	7295	1	337870	NM_001191513	-105922	ENSBTAG00000035319	MAD2L1	MAD2 mitotic arrest deficient-like 1 (yeast)
chr6	6998784	6999041	258	259	6999018	8	12.4694	7.66805	7.68382	C13_peak_258	Intron (NM_174417/281972, intron 13 of 20)	6	7105047	7108888	3842	2	515768	NM_001025332	109847	ENSBTAG00000017045	FABP2	fatty acid binding protein 2, intestinal
chr6	7005287	7005826	540	541	7005674	13	23.1758	12.3361	17.7065	C13_peak_259	Intron (NM_174417/281972, intron 13 of 20)	6	7105047	7108888	3842	2	515768	NM_001025332	103062	ENSBTAG00000017045	FABP2	fatty acid binding protein 2, intestinal
chr6	8909240	8910032	793	794	8909385	35	33.4599	13.0349	27.4973	C13_peak_260	Distal Intergenic	6	8124491	8251738	127248	2	524136	NM_001077961	-657502	ENSBTAG00000007316	NDST3	N-deacetylase/N-sulfotransferase (heparan glucosaminyl) 3
chr6	17986434	17986630	197	198	17986519	6	9.844	6.16805	5.23703	C13_peak_261	Distal Intergenic	6	17827884	17831767	3884	2	505603	NM_001206221	-154667	ENSBTAG00000014226	RPL34	ribosomal protein L34
chr6	18004292	18004494	203	204	18004379	11	14.7058	9.07312	9.7603	C13_peak_262	Distal Intergenic	6	17827884	17831767	3884	2	505603	NM_001206221	-172525	ENSBTAG00000014226	RPL34	ribosomal protein L34
chr6	19790259	19790455	197	198	19790344	13	18.4266	10.7877	13.2632	C13_peak_263	Distal Intergenic	6	20111144	20138597	27454	2	505126	NM_001035018	348142	ENSBTAG00000004230	AIMP1	aminoacyl tRNA synthetase complex interacting multifunctional protein 1
chr6	19800385	19800885	501	502	19800531	7	8.90576	6.15452	4.41357	C13_peak_264	Distal Intergenic	6	20111144	20138597	27454	2	505126	NM_001035018	337712	ENSBTAG00000004230	AIMP1	aminoacyl tRNA synthetase complex interacting multifunctional protein 1
chr6	26334104	26334315	212	213	26334181	15	26.5031	13.8968	20.8779	C13_peak_265	Distal Intergenic	6	26376148	26433473	57326	2	280868	NM_001101834	99158	ENSBTAG00000011944	MTTP	microsomal triglyceride transfer protein
chr6	27291391	27291619	229	230	27291546	4	6.47818	4.40575	2.22468	C13_peak_266	Distal Intergenic	6	27333479	27512869	179391	1	538668	NM_001076119	-41860	ENSBTAG00000012343	TSPAN5	tetraspanin 5
chr6	27309014	27309248	235	236	27309220	4	6.47818	4.40575	2.22468	C13_peak_267	Distal Intergenic	6	27333479	27512869	179391	1	538668	NM_001076119	-24231	ENSBTAG00000012343	TSPAN5	tetraspanin 5
chr6	45735680	45735892	213	214	45735791	19	31.4995	16.3488	25.6337	C13_peak_268	Distal Intergenic	6	45629615	45683587	53973	2	512327	NM_001098018	-52093	ENSBTAG00000008896	DHX15	DEAH-box helicase 15
chr6	45755191	45755481	291	292	45755275	4	5.9429	4.26003	1.9323	C13_peak_269	Distal Intergenic	6	45629615	45683587	53973	2	512327	NM_001098018	-71604	ENSBTAG00000008896	DHX15	DEAH-box helicase 15
chr6	52110808	52110999	192	193	52110912	4	5.71777	4.19005	1.76076	C13_peak_270	Distal Intergenic	6	51536863	52009280	472418	1	514537	NM_001192975	573945	ENSBTAG00000000061	PCDH7	protocadherin 7
chr6	56204498	56204700	203	204	56204606	7	11.0279	6.89476	6.36581	C13_peak_271	Distal Intergenic	6	58486550	58565111	78562	1	511424	NM_001104973	-2281850	ENSBTAG00000006643	C6H4orf19	chromosome 6 open reading frame, human C4orf19
chr6	56557789	56558156	368	369	56557882	10	17.2254	9.69266	12.1106	C13_peak_272	Distal Intergenic	6	58486550	58565111	78562	1	511424	NM_001104973	-1928394	ENSBTAG00000006643	C6H4orf19	chromosome 6 open reading frame, human C4orf19
chr6	56558812	56559235	424	425	56559054	11	19.175	10.5738	13.9441	C13_peak_273	Distal Intergenic	6	58486550	58565111	78562	1	511424	NM_001104973	-1927315	ENSBTAG00000006643	C6H4orf19	chromosome 6 open reading frame, human C4orf19
chr6	77986439	77986645	207	208	77986529	8	12.9162	7.79461	8.10948	C13_peak_274	Distal Intergenic	6	78734711	79313831	579121	1	282651	NM_181033	-748066	ENSBTAG00000013918	ADGRL3	adhesion G protein-coupled receptor L3
chr6	88825083	88825492	410	411	88825396	10	11.7141	7.64701	6.95981	C13_peak_275	Distal Intergenic	6	88695939	88739180	43242	2	530076	NM_001035380	-85903	ENSBTAG00000013718	GC	GC, vitamin D binding protein
chr6	89202156	89202704	549	550	89202531	24	20.5175	9.47777	15.2257	C13_peak_276	Intron (NM_001192797/534082, intron 17 of 21)	6	89162542	89460195	297654	2	534082	NM_001192797	257491	ENSBTAG00000006507	ADAMTS3	ADAM metallopeptidase with thrombospondin type 1 motif 3
chr6	89203147	89203647	501	502	89203228	13	7.70639	4.76917	3.36072	C13_peak_277a	Intron (NM_001192797/534082, intron 17 of 21)	6	89162542	89460195	297654	2	534082	NM_001192797	256548	ENSBTAG00000006507	ADAMTS3	ADAM metallopeptidase with thrombospondin type 1 motif 3
chr6	89203147	89203647	501	502	89203512	12	7.51808	4.83743	3.18515	C13_peak_277b	Intron (NM_001192797/534082, intron 17 of 21)	6	89162542	89460195	297654	2	534082	NM_001192797	256548	ENSBTAG00000006507	ADAMTS3	ADAM metallopeptidase with thrombospondin type 1 motif 3
chr6	89207682	89207913	232	233	89207767	8	8.61975	6.08318	4.14432	C13_peak_278	Intron (NM_001192797/534082, intron 17 of 21)	6	89162542	89460195	297654	2	534082	NM_001192797	252282	ENSBTAG00000006507	ADAMTS3	ADAM metallopeptidase with thrombospondin type 1 motif 3
chr6	89215471	89215702	232	233	89215626	13	18.2006	10.6928	13.0514	C13_peak_279	Intron (NM_001192797/534082, intron 17 of 21)	6	89162542	89460195	297654	2	534082	NM_001192797	244493	ENSBTAG00000006507	ADAMTS3	ADAM metallopeptidase with thrombospondin type 1 motif 3
chr6	89218332	89218912	581	582	89218412	15	27.1791	14.0697	21.5184	C13_peak_280a	Intron (NM_001192797/534082, intron 17 of 21)	6	89162542	89460195	297654	2	534082	NM_001192797	241283	ENSBTAG00000006507	ADAMTS3	ADAM metallopeptidase with thrombospondin type 1 motif 3
chr6	89218332	89218912	581	582	89218884	14	24.9369	13.1467	19.3812	C13_peak_280b	Intron (NM_001192797/534082, intron 17 of 21)	6	89162542	89460195	297654	2	534082	NM_001192797	241283	ENSBTAG00000006507	ADAMTS3	ADAM metallopeptidase with thrombospondin type 1 motif 3
chr6	114728101	114728315	215	216	114728235	13	19.5151	11.2166	14.2678	C13_peak_281	Distal Intergenic	6	115276058	115404039	127982	1	540131	NM_001076201	-547743	ENSBTAG00000010343	C1QTNF7	C1q and tumor necrosis factor related protein 7
chr6	114729366	114729696	331	332	114729436	7	9.71698	6.47387	5.17924	C13_peak_282	Distal Intergenic	6	115276058	115404039	127982	1	540131	NM_001076201	-546362	ENSBTAG00000010343	C1QTNF7	C1q and tumor necrosis factor related protein 7
chr6	114730773	114731014	242	243	114730875	16	29.3973	14.9796	23.6035	C13_peak_283	Distal Intergenic	6	115276058	115404039	127982	1	540131	NM_001076201	-545044	ENSBTAG00000010343	C1QTNF7	C1q and tumor necrosis factor related protein 7
chr7	12110297	12110494	198	199	12110464	12	21.1593	11.455	15.8266	C13_peak_284	Distal Intergenic	7	12325362	12329752	4391	1	338065	NM_176660	-214868	ENSBTAG00000012634	NDUFB7	NADH:ubiquinone oxidoreductase subunit B7
chr7	12134529	12134749	221	222	12134613	8	13.4429	7.93035	8.55374	C13_peak_285	Distal Intergenic	7	12325362	12329752	4391	1	338065	NM_176660	-190613	ENSBTAG00000012634	NDUFB7	NADH:ubiquinone oxidoreductase subunit B7
chr7	12141510	12141733	224	225	12141642	4	6.47818	4.40575	2.22468	C13_peak_286	Distal Intergenic	7	12325362	12329752	4391	1	338065	NM_176660	-183629	ENSBTAG00000012634	NDUFB7	NADH:ubiquinone oxidoreductase subunit B7
chr7	34812872	34813196	325	326	34813071	24	22.3833	10.5717	16.9921	C13_peak_287	Distal Intergenic	7	35662599	35763607	101009	2	493643	NM_001007809	950411	ENSBTAG00000006978	HSD17B4	hydroxysteroid 17-beta dehydrogenase 4
chr7	51856482	51856721	240	241	51856587	4	6.47818	4.40575	2.22468	C13_peak_288	Intron (NM_001035366/526848, intron 11 of 17)	7	51803639	51806667	3029	2	520949	NM_001099377	-49815	ENSBTAG00000014192	LRRTM2	leucine rich repeat transmembrane neuronal 2
chr7	56589884	56590100	217	218	56589969	20	20.9052	10.9707	15.5976	C13_peak_289	Distal Intergenic	7	56231970	56350496	118527	2	281946	NM_001206634	-239388	ENSBTAG00000019472	NR3C1	nuclear receptor subfamily 3 group C member 1
chr7	56591147	56591411	265	266	56591212	16	14.779	8.38927	9.8308	C13_peak_290	Distal Intergenic	7	56231970	56350496	118527	2	281946	NM_001206634	-240651	ENSBTAG00000019472	NR3C1	nuclear receptor subfamily 3 group C member 1
chr7	56618635	56618836	202	203	56618716	36	44.0744	18.8031	37.6385	C13_peak_291	Distal Intergenic	7	56231970	56350496	118527	2	281946	NM_001206634	-268139	ENSBTAG00000019472	NR3C1	nuclear receptor subfamily 3 group C member 1
chr7	56620251	56620705	455	456	56620490	8	8.86991	6.21387	4.38023	C13_peak_292	Distal Intergenic	7	56231970	56350496	118527	2	281946	NM_001206634	-269755	ENSBTAG00000019472	NR3C1	nuclear receptor subfamily 3 group C member 1
chr7	56621796	56622010	215	216	56621991	18	21.6072	11.9081	16.2534	C13_peak_293	Distal Intergenic	7	56231970	56350496	118527	2	281946	NM_001206634	-271300	ENSBTAG00000019472	NR3C1	nuclear receptor subfamily 3 group C member 1
chr7	71963322	71963548	227	228	71963400	14	25.2222	13.2173	19.6339	C13_peak_294	Distal Intergenic	7	71421945	71479026	57082	2	538540	NM_001105417	-484296	ENSBTAG00000016199	CLINT1	clathrin interactor 1
chr7	85353003	85353205	203	204	85353054	4	5.76969	4.20667	1.80565	C13_peak_295	Intron (NM_001081615/613590, intron 3 of 7)	7	85267807	85556934	289128	1	613590	NM_001081615	85196	ENSBTAG00000024275	XRCC4	X-ray repair cross complementing 4
chr7	105819116	105819307	192	193	105819202	4	5.66188	4.17183	1.712	C13_peak_296	Distal Intergenic	7	105030976	105045004	14029	2	617720	NM_001046608	-774112	ENSBTAG00000027728	NUDT12	nudix hydrolase 12
chr7	105856690	105857099	410	411	105856814	11	12.0533	7.76238	7.2843	C13_peak_297	Distal Intergenic	7	105030976	105045004	14029	2	617720	NM_001046608	-811686	ENSBTAG00000027728	NUDT12	nudix hydrolase 12
chr7	105875678	105875900	223	224	105875777	8	11.2244	7.25542	6.55008	C13_peak_298	Distal Intergenic	7	105030976	105045004	14029	2	617720	NM_001046608	-830674	ENSBTAG00000027728	NUDT12	nudix hydrolase 12
chr7	105902464	105902911	448	449	105902835	18	29.1882	15.4048	23.4156	C13_peak_299	Distal Intergenic	7	105030976	105045004	14029	2	617720	NM_001046608	-857460	ENSBTAG00000027728	NUDT12	nudix hydrolase 12
chr7	105905767	105906202	436	437	105906088	7	9.53275	6.40544	5.00971	C13_peak_300	Distal Intergenic	7	105030976	105045004	14029	2	617720	NM_001046608	-860763	ENSBTAG00000027728	NUDT12	nudix hydrolase 12
chr8	11963975	11964219	245	246	11964066	4	6.47818	4.40575	2.22468	C13_peak_301	Distal Intergenic	8	11480116	11543046	62931	2	512995	NM_001075591	-420929	ENSBTAG00000000555	ACO1	aconitase 1
chr8	35872173	35872361	189	190	35872253	5	7.12667	5.0004	2.83173	C13_peak_302	Distal Intergenic	8	37291840	37292779	940	2	767934	NM_001077007	1420418	ENSBTAG00000015963	TMEM261	transmembrane protein 261
chr8	36103707	36104041	335	336	36103788	4	5.34429	4.06167	1.44744	C13_peak_303	Distal Intergenic	8	37291840	37292779	940	2	767934	NM_001077007	1188738	ENSBTAG00000015963	TMEM261	transmembrane protein 261
chr8	36112865	36113097	233	234	36112953	8	10.4812	6.96425	5.84511	C13_peak_304	Distal Intergenic	8	37291840	37292779	940	2	767934	NM_001077007	1179682	ENSBTAG00000015963	TMEM261	transmembrane protein 261
chr8	36113690	36113890	201	202	36113776	4	6.47818	4.40575	2.22468	C13_peak_305	Distal Intergenic	8	37291840	37292779	940	2	767934	NM_001077007	1178889	ENSBTAG00000015963	TMEM261	transmembrane protein 261
chr8	36128057	36128253	197	198	36128146	7	11.5129	7.02318	6.8182	C13_peak_306	Distal Intergenic	8	37291840	37292779	940	2	767934	NM_001077007	1164526	ENSBTAG00000015963	TMEM261	transmembrane protein 261
chr8	36134175	36134406	232	233	36134229	4	6.42747	4.39313	2.22468	C13_peak_307	Distal Intergenic	8	37291840	37292779	940	2	767934	NM_001077007	1158373	ENSBTAG00000015963	TMEM261	transmembrane protein 261
chr8	36138619	36138860	242	243	36138703	9	10.9986	7.28748	6.33761	C13_peak_308	Distal Intergenic	8	37291840	37292779	940	2	767934	NM_001077007	1153919	ENSBTAG00000015963	TMEM261	transmembrane protein 261
chr8	36146956	36147343	388	389	36147084	9	14.3291	8.54898	9.4018	C13_peak_309	Distal Intergenic	8	37291840	37292779	940	2	767934	NM_001077007	1145436	ENSBTAG00000015963	TMEM261	transmembrane protein 261
chr8	44634146	44634559	414	415	44634229	10	10.6662	7.0915	6.02487	C13_peak_310a	Distal Intergenic	8	44682699	44892129	209431	1	785045	NM_001102335	-48140	ENSBTAG00000033190	PGM5	phosphoglucomutase 5
chr8	44634146	44634559	414	415	44634483	13	13.4356	8.26054	8.55374	C13_peak_310b	Distal Intergenic	8	44682699	44892129	209431	1	785045	NM_001102335	-48140	ENSBTAG00000033190	PGM5	phosphoglucomutase 5
chr8	46913508	46913793	286	287	46913755	21	38.4154	18.9068	32.2324	C13_peak_311	Distal Intergenic	8	46883356	46907760	24405	2	539139	NM_001193214	-5748	ENSBTAG00000016229	KLF9	Kruppel like factor 9
chr8	46914205	46914408	204	205	46914301	21	23.4434	12.1801	17.9575	C13_peak_312	Distal Intergenic	8	46883356	46907760	24405	2	539139	NM_001193214	-6445	ENSBTAG00000016229	KLF9	Kruppel like factor 9
chr8	56719872	56720308	437	438	56720231	6	9.844	6.16805	5.23703	C13_peak_313	Distal Intergenic	8	55837381	55992437	155057	1	508893	NM_001081583	882491	ENSBTAG00000003532	TLE4	transducin like enhancer of split 4
chr8	56763410	56763731	322	323	56763496	5	8.1278	5.2869	3.67511	C13_peak_314	Distal Intergenic	8	55837381	55992437	155057	1	508893	NM_001081583	926029	ENSBTAG00000003532	TLE4	transducin like enhancer of split 4
chr8	56766835	56767083	249	250	56766973	8	13.4429	7.93035	8.55374	C13_peak_315	Distal Intergenic	8	55837381	55992437	155057	1	508893	NM_001081583	929454	ENSBTAG00000003532	TLE4	transducin like enhancer of split 4
chr8	56784905	56785333	429	430	56785283	5	8.1278	5.2869	3.67511	C13_peak_316	Distal Intergenic	8	55837381	55992437	155057	1	508893	NM_001081583	947524	ENSBTAG00000003532	TLE4	transducin like enhancer of split 4
chr8	56794788	56794976	189	190	56794957	7	11.618	7.0492	6.86593	C13_peak_317	Distal Intergenic	8	55837381	55992437	155057	1	508893	NM_001081583	957407	ENSBTAG00000003532	TLE4	transducin like enhancer of split 4
chr8	56853365	56853577	213	214	56853500	32	41.9576	19.1903	35.6328	C13_peak_318	Distal Intergenic	8	55837381	55992437	155057	1	508893	NM_001081583	1015984	ENSBTAG00000003532	TLE4	transducin like enhancer of split 4
chr8	61275503	61275831	329	330	61275685	10	12.8846	8.20648	8.07918	C13_peak_319	Distal Intergenic	8	61157469	61230549	73081	1	520088	NM_001111260	118034	ENSBTAG00000021686	MELK	maternal embryonic leucine zipper kinase
chr8	61281099	61281328	230	231	61281180	17	19.9201	11.1795	14.6545	C13_peak_320	Distal Intergenic	8	61157469	61230549	73081	1	520088	NM_001111260	123630	ENSBTAG00000021686	MELK	maternal embryonic leucine zipper kinase
chr8	61283442	61283821	380	381	61283594	36	37.632	15.0159	31.5026	C13_peak_321	Distal Intergenic	8	61157469	61230549	73081	1	520088	NM_001111260	125973	ENSBTAG00000021686	MELK	maternal embryonic leucine zipper kinase
chr8	64876891	64877084	194	195	64876956	4	6.24065	4.34453	2.17654	C13_peak_322	Distal Intergenic	8	64998031	65000257	2227	2	539818	NM_001102521	123173	ENSBTAG00000019143	LOC539818	ribophorin I-like
chr8	74600584	74600787	204	205	74600745	14	16.8982	10.0331	11.8326	C13_peak_323	Distal Intergenic	8	74374393	74374459	67	2	100313446	NR_030918	-226125	NA	MIR2404-2	microRNA 2404-2
chr8	74609597	74609789	193	194	74609684	6	9.844	6.16805	5.23703	C13_peak_324	Distal Intergenic	8	74834628	74913332	78705	1	508045	NM_001191533	-224839	ENSBTAG00000018317	PPP2R2A	protein phosphatase 2 regulatory subunit Balpha
chr8	74640648	74641147	500	501	74640736	9	12.3064	7.85572	7.52853	C13_peak_325a	Distal Intergenic	8	74834628	74913332	78705	1	508045	NM_001191533	-193481	ENSBTAG00000018317	PPP2R2A	protein phosphatase 2 regulatory subunit Balpha
chr8	74640648	74641147	500	501	74641028	20	32.0603	16.6508	26.159	C13_peak_325b	Distal Intergenic	8	74834628	74913332	78705	1	508045	NM_001191533	-193481	ENSBTAG00000018317	PPP2R2A	protein phosphatase 2 regulatory subunit Balpha
chr8	74717916	74718223	308	309	74717982	5	6.97614	4.94983	2.68943	C13_peak_326	Distal Intergenic	8	74834628	74913332	78705	1	508045	NM_001191533	-116405	ENSBTAG00000018317	PPP2R2A	protein phosphatase 2 regulatory subunit Balpha
chr8	77359997	77360240	244	245	77360180	5	8.1278	5.2869	3.67511	C13_peak_327	Promoter (1-2kb)	8	77361675	77368156	6482	1	508932	NM_001034339	-1435	ENSBTAG00000014907	IL11RA	interleukin 11 receptor subunit alpha
chr8	83240562	83240903	342	343	83240692	13	11.2678	6.95249	6.59054	C13_peak_328	Intron (NM_174316/281762, intron 14 of 21)	8	83242822	83253558	10737	2	281554	NM_001244608	12655	ENSBTAG00000031517	TSPY	testis specific protein, Y-linked 1
chr8	89376997	89377199	203	204	89377075	16	19.577	11.1761	14.3249	C13_peak_329	Distal Intergenic	8	90017446	90018996	1551	2	504939	NM_001045901	641797	ENSBTAG00000003033	GADD45G	growth arrest and DNA damage inducible gamma
chr8	89377561	89377825	265	266	89377714	11	13.6534	8.58965	8.75676	C13_peak_330	Distal Intergenic	8	90017446	90018996	1551	2	504939	NM_001045901	641171	ENSBTAG00000003033	GADD45G	growth arrest and DNA damage inducible gamma
chr8	110660565	110660797	233	234	110660728	5	8.1278	5.2869	3.67511	C13_peak_331	Distal Intergenic	8	110409332	110605777	196446	2	538990	NM_001015669	-54788	ENSBTAG00000015936	BRINP1	BMP/retinoic acid inducible neural specific 1
chr8	110715645	110716154	510	511	110715728	6	9.844	6.16805	5.23703	C13_peak_332	Distal Intergenic	8	110409332	110605777	196446	2	538990	NM_001015669	-109868	ENSBTAG00000015936	BRINP1	BMP/retinoic acid inducible neural specific 1
chr8	110734321	110734513	193	194	110734454	5	8.10186	5.2805	3.67511	C13_peak_333	Distal Intergenic	8	110409332	110605777	196446	2	538990	NM_001015669	-128544	ENSBTAG00000015936	BRINP1	BMP/retinoic acid inducible neural specific 1
chr9	7760731	7760976	246	247	7760831	10	11.8922	7.73643	7.13095	C13_peak_334	Distal Intergenic	9	7692862	7693373	512	2	281685	NM_174270	-67358	ENSBTAG00000008059	CHRM3	cholinergic receptor muscarinic 3
chr9	7793690	7793922	233	234	7793833	7	11.2801	6.96326	6.59959	C13_peak_335	Distal Intergenic	9	7692862	7693373	512	2	281685	NM_174270	-100317	ENSBTAG00000008059	CHRM3	cholinergic receptor muscarinic 3
chr9	44687543	44688085	543	544	44687979	27	17.8325	7.21934	12.6971	C13_peak_336	Distal Intergenic	9	44355220	44377512	22293	2	538384	NM_001192936	-310031	ENSBTAG00000000816	PRDM1	PR/SET domain 1
chr9	45062924	45063139	216	217	45063002	6	9.844	6.16805	5.23703	C13_peak_337	Distal Intergenic	9	45169675	45301786	132112	1	286818	NM_174772	-106536	ENSBTAG00000016281	PREP	prolyl endopeptidase
chr9	48828718	48828911	194	195	48828811	5	6.86096	4.90973	2.57991	C13_peak_338	Intron (NM_001193063/615226, intron 10 of 15)	9	48474665	49218775	744111	2	615226	NM_001193063	389864	ENSBTAG00000033153	GRIK2	glutamate ionotropic receptor kainate type subunit 2
chr9	50081890	50082080	191	192	50082019	5	6.84662	4.90465	2.56722	C13_peak_339	Intron (NM_001206118/538416, intron 37 of 41)	9	50160697	50228919	68223	1	537223	NM_001192972	-78617	ENSBTAG00000002294	SIM1	single-minded family bHLH transcription factor 1
chr9	53620531	53620762	232	233	53620663	25	10.6307	4.37853	5.99123	C13_peak_340	Distal Intergenic	9	53673441	53682099	8659	1	615440	NM_001083516	-52679	ENSBTAG00000003174	NDUFAF4	NADH:ubiquinone oxidoreductase complex assembly factor 4
chr9	65873048	65873343	296	297	65873201	23	5.26311	2.61189	1.37047	C13_peak_341	Distal Intergenic	9	66115462	66211054	95593	1	512152	NM_001206593	-242119	ENSBTAG00000003384	CEP162	centrosomal protein 162
chr9	65873743	65873953	211	212	65873831	32	11.408	3.94271	6.71986	C13_peak_342	Distal Intergenic	9	66115462	66211054	95593	1	512152	NM_001206593	-241509	ENSBTAG00000003384	CEP162	centrosomal protein 162
chrX	18977274	18977464	191	192	18977360	5	8.1278	5.2869	3.67511	C13_peak_352	Intron (NM_001078043/614260, intron 6 of 6)	30	18910529	18918493	7965	1	512036	NM_001205714	66745	ENSBTAG00000018090	ZNF449	zinc finger protein 449
chrX	18981612	18981855	244	245	18981659	4	5.9429	4.26003	1.9323	C13_peak_353	Intron (NM_001078043/614260, intron 6 of 6)	30	18910529	18918493	7965	1	512036	NM_001205714	71083	ENSBTAG00000018090	ZNF449	zinc finger protein 449
chrX	19146626	19146914	289	290	19146701	6	9.844	6.16805	5.23703	C13_peak_354	Distal Intergenic	30	18812295	19100123	287829	2	614260	NM_001078043	-46503	ENSBTAG00000022837	ZNF75D	zinc finger protein 75D
chrX	19174407	19174596	190	191	19174535	7	11.618	7.0492	6.86593	C13_peak_355	Distal Intergenic	30	18812295	19100123	287829	2	614260	NM_001078043	-74284	ENSBTAG00000022837	ZNF75D	zinc finger protein 75D
chrX	30972329	30972619	291	292	30972471	26	44.4839	21.6321	38.0294	C13_peak_356	Distal Intergenic	30	30989740	31029260	39521	1	613334	NM_001102262	-17121	ENSBTAG00000034045	FMR1NB	fragile X mental retardation 1 neighbor
chrX	30973320	30973872	553	554	30973427	14	18.706	10.9312	13.5345	C13_peak_357	Distal Intergenic	30	30989740	31029260	39521	1	613334	NM_001102262	-15868	ENSBTAG00000034045	FMR1NB	fragile X mental retardation 1 neighbor
chrX	30975386	30975635	250	251	30975532	10	17.2254	9.69266	12.1106	C13_peak_358	Distal Intergenic	30	30989740	31029260	39521	1	613334	NM_001102262	-14105	ENSBTAG00000034045	FMR1NB	fragile X mental retardation 1 neighbor
chrX	91193469	91193725	257	258	91193545	8	5.48633	4.20273	1.56747	C13_peak_359	Intron (NM_174191/281510, intron 1 of 8)	30	91180879	91191313	10435	1	540421	NM_001014964	12590	ENSBTAG00000005039	ARAF	A-Raf proto-oncogene, serine/threonine kinase
chrX	92604822	92605011	190	191	92604926	4	5.61774	4.1572	1.68796	C13_peak_360	Distal Intergenic	30	92587042	92591234	4193	1	505725	NM_001081580	17780	ENSBTAG00000037728	PAGE4	PAGE family member 4
chrX	134396217	134396409	193	194	134396376	5	8.1278	5.2869	3.67511	C13_peak_361	Distal Intergenic	30	134606820	134643886	37067	2	532784	NM_001192739	247477	ENSBTAG00000007092	GRPR	gastrin releasing peptide receptor
chrX	135831733	135831931	199	200	135831872	7	9.90005	6.53953	5.2884	C13_peak_362	Intron (NM_001101896/508293, intron 7 of 14)	30	135804046	135892336	88291	2	508293	NM_001101896	60405	ENSBTAG00000018292	MOSPD2	motile sperm domain containing 2
