# Supplementary material for: Dysregulation of the Acrosome Formation Network by 8-oxoguanine (8-oxoG) in Infertile Sperm: A Case Report with Advanced Techniques
Source: Int J Mol Sci. 2021 May 30;22(11):5857. doi: 10.3390/ijms22115857 (PMC8199233; doi:10.3390/ijms22115857)
Supplement: Supplementary file 1 [file ijms-22-05857-s001.zip › Suppl Table_02_C14 OG-seq.xlsx]

## Sheet: Supp_02
Supplementary Table 2. Annotation of 8-oxoG loci in C14 sperm DNA
chr	start	end	width	length	abs_summit	pileup	(-)log10(pvalue)	fold_enrichment	(-)log10(qvalue)	MACS_peakID	annotation	geneChr	geneStart	geneEnd	geneLength	geneStrand	geneId	transcriptId	distanceToTSS	ENSEMBL	SYMBOL	GENENAME
chr1	5239718	5239918	201	202	5239896	16	16.5789	9.47573	11.8542	C14_peak_1	Distal Intergenic	1	5035870	5037861	1992	1	538761	NM_001098096	203848	ENSBTAG00000039820	CLDN8	claudin 8
chr1	5262234	5262482	249	250	5262437	28	28.98	13.0785	23.9084	C14_peak_2	Distal Intergenic	1	5447785	5915577	467793	1	533760	NM_001102514	-185303	NA	GRIK1	glutamate ionotropic receptor kainate type subunit 1
chr1	5279667	5279867	201	202	5279757	14	12.3746	7.40891	7.85057	C14_peak_3	Distal Intergenic	1	5447785	5915577	467793	1	533760	NM_001102514	-167918	NA	GRIK1	glutamate ionotropic receptor kainate type subunit 1
chr1	7572668	7572866	199	200	7572781	6	6.46699	4.91344	2.41313	C14_peak_4	Distal Intergenic	1	6630181	6643906	13726	2	615200	NM_001083513	-928762	ENSBTAG00000001412	N6AMT1	N-6 adenine-specific DNA methyltransferase 1 (putative)
chr1	19745812	19746056	245	246	19746042	6	6.9531	5.15096	2.78874	C14_peak_5	Distal Intergenic	1	19881347	19881431	85	2	100170920	NR_030791	135375	ENSBTAG00000029827	MIR125B-2	microRNA 125b-2
chr1	23467258	23467455	198	199	23467351	7	6.50987	4.94118	2.45058	C14_peak_6	Distal Intergenic	1	22455495	22474290	18796	2	539474	NM_001040567	-992968	ENSBTAG00000034347	RBM11	RNA binding motif protein 11
chr1	29319388	29319612	225	226	29319501	53	40.2426	10.6758	34.8666	C14_peak_7	Distal Intergenic	1	28659456	28972472	313017	2	615745	NM_001122729	-346916	NA	GBE1	1,4-alpha-glucan branching enzyme 1
chr1	45144773	45144983	211	212	45144927	10	6.03627	4.26026	2.03908	C14_peak_8	Distal Intergenic	1	45065846	45078998	13153	1	511959	NM_001101948	78927	ENSBTAG00000004538	ZNF596	zinc finger protein 596
chr1	57222141	57223010	870	871	57222225	27	9.90114	3.89405	5.51357	C14_peak_9a	Distal Intergenic	1	57227953	57268917	40965	1	522055	NM_001205892	-4943	ENSBTAG00000015065	TMPRSS7	transmembrane protease, serine 7
chr1	57222141	57223010	870	871	57222526	67	57.1379	13.5892	51.4364	C14_peak_9b	Distal Intergenic	1	57227953	57268917	40965	1	522055	NM_001205892	-4943	ENSBTAG00000015065	TMPRSS7	transmembrane protease, serine 7
chr1	57223253	57223463	211	212	57223439	53	12.9718	3.14613	8.41379	C14_peak_10	Distal Intergenic	1	57227953	57268917	40965	1	522055	NM_001205892	-4490	ENSBTAG00000015065	TMPRSS7	transmembrane protease, serine 7
chr1	57449285	57449538	254	255	57449498	30	36.8938	17.0108	31.6256	C14_peak_11	Distal Intergenic	1	57326875	57340896	14022	2	784939	NM_001191208	-108389	ENSBTAG00000016556	GCSAM	germinal center associated signaling and motility
chr1	57460967	57461194	228	229	57461152	29	41.2526	19.7845	35.8549	C14_peak_12	Distal Intergenic	1	57568530	57591078	22549	1	534910	NM_001034620	-107336	ENSBTAG00000033319	CD200	CD200 molecule
chr1	57466162	57466395	234	235	57466366	28	37.4682	18.0347	32.1889	C14_peak_13	Distal Intergenic	1	57568530	57591078	22549	1	534910	NM_001034620	-102135	ENSBTAG00000033319	CD200	CD200 molecule
chr1	59726859	59727079	221	222	59726904	5	5.31659	4.2472	1.59473	C14_peak_14	Distal Intergenic	1	59398273	59398366	94	2	100313385	NR_031331	-328493	ENSBTAG00000036373	MIR568	microRNA 568
chr1	74782596	74782826	231	232	74782710	7	7.63113	5.55751	3.41403	C14_peak_15	Intron (NM_001314065/540539, intron 2 of 5)	1	74773889	74793638	19750	2	540539	NM_001314065	10812	ENSBTAG00000035844	HRASLS	HRAS like suppressor
chr1	75178282	75178524	243	244	75178503	12	15.7232	9.56607	11.035	C14_peak_16	Intron (NM_001205856/519376, intron 1 of 1)	1	75101223	75222153	120931	1	519376	NM_001205856	77059	ENSBTAG00000005430	MB21D2	Mab-21 domain containing 2
chr1	79956982	79957266	285	286	79957213	5	5.66018	4.41511	1.70514	C14_peak_17	Distal Intergenic	1	80188691	80203462	14772	1	539020	NM_001206450	-231425	ENSBTAG00000001511	BCL6	B-cell CLL/lymphoma 6
chr1	84804674	84804868	195	196	84804840	11	14.1634	8.83022	9.54636	C14_peak_18	Distal Intergenic	1	84656319	84689039	32721	1	539869	NM_001102233	148355	ENSBTAG00000012797	DCUN1D1	defective in cullin neddylation 1 domain containing 1
chr1	114406700	114406918	219	220	114406795	6	6.42166	4.8903	2.37202	C14_peak_19	Intron (NM_001205989/531741, intron 11 of 13)	1	114292213	114431455	139243	2	531741	NM_001205989	24537	ENSBTAG00000013439	ARHGEF26	Rho guanine nucleotide exchange factor 26
chr1	123562570	123562782	213	214	123562746	7	7.39675	5.43534	3.19577	C14_peak_20	Distal Intergenic	1	123322467	123444003	121537	1	533642	NM_001101149	240103	ENSBTAG00000007331	PLOD2	procollagen-lysine,2-oxoglutarate 5-dioxygenase 2
chr1	124954017	124954230	214	215	124954161	14	6.37488	3.85715	2.33284	C14_peak_21	Distal Intergenic	1	125862998	125885655	22658	2	509304	NM_001205651	931425	ENSBTAG00000007933	C1H3orf58	chromosome 1 open reading frame, human C3orf58
chr1	144078696	144078905	210	211	144078850	12	9.73659	6.21416	5.35613	C14_peak_22	Distal Intergenic	1	144067290	144071071	3782	2	517889	NM_001114509	-7625	ENSBTAG00000021276	TFF3	trefoil factor 3
chr1	144087161	144087358	198	199	144087347	14	9.28988	5.51971	4.94174	C14_peak_23	Distal Intergenic	1	144067290	144071071	3782	2	517889	NM_001114509	-16090	ENSBTAG00000021276	TFF3	trefoil factor 3
chr1	144101563	144101757	195	196	144101713	14	16.2343	9.67715	11.5239	C14_peak_24	Distal Intergenic	1	144067290	144071071	3782	2	517889	NM_001114509	-30492	ENSBTAG00000021276	TFF3	trefoil factor 3
chr1	144115051	144115246	196	197	144115227	21	21.7254	11.1561	16.8331	C14_peak_25	Distal Intergenic	1	144067290	144071071	3782	2	517889	NM_001114509	-43980	ENSBTAG00000021276	TFF3	trefoil factor 3
chr1	145293925	145294224	300	301	145294184	105	146.905	39.5554	140.078	C14_peak_26	Distal Intergenic	1	145154624	145178774	24151	1	512069	NM_001046108	139301	ENSBTAG00000017010	FAM207A	family with sequence similarity 207 member A
chr1	145295239	145295474	236	237	145295339	51	14.2182	3.45936	9.59927	C14_peak_27	Distal Intergenic	1	145154624	145178774	24151	1	512069	NM_001046108	140615	ENSBTAG00000017010	FAM207A	family with sequence similarity 207 member A
chr1	145305644	145305887	244	245	145305865	35	20.8406	6.89696	15.9741	C14_peak_28	Distal Intergenic	1	145154624	145178774	24151	1	512069	NM_001046108	151020	ENSBTAG00000017010	FAM207A	family with sequence similarity 207 member A
chr1	145307989	145308292	304	305	145308225	45	41.6495	13.7211	36.2354	C14_peak_29	Distal Intergenic	1	145154624	145178774	24151	1	512069	NM_001046108	153365	ENSBTAG00000017010	FAM207A	family with sequence similarity 207 member A
chr1	145310874	145311094	221	222	145310956	60	41.1841	9.48112	35.7877	C14_peak_30	Distal Intergenic	1	145154624	145178774	24151	1	512069	NM_001046108	156250	ENSBTAG00000017010	FAM207A	family with sequence similarity 207 member A
chr1	145328496	145328696	201	202	145328683	46	30.0669	8.33686	24.9694	C14_peak_31	Distal Intergenic	1	145154624	145178774	24151	1	512069	NM_001046108	173872	ENSBTAG00000017010	FAM207A	family with sequence similarity 207 member A
chr1	145332678	145332901	224	225	145332763	96	43.7095	5.96197	38.2459	C14_peak_32	Distal Intergenic	1	145154624	145178774	24151	1	512069	NM_001046108	178054	ENSBTAG00000017010	FAM207A	family with sequence similarity 207 member A
chr1	145335187	145335393	207	208	145335278	28	17.083	6.64792	12.337	C14_peak_33	Distal Intergenic	1	145154624	145178774	24151	1	512069	NM_001046108	180563	ENSBTAG00000017010	FAM207A	family with sequence similarity 207 member A
chr1	145342618	145343485	868	869	145342696	18	9.36513	4.80717	5.01318	C14_peak_34a	Distal Intergenic	1	145154624	145178774	24151	1	512069	NM_001046108	187994	ENSBTAG00000017010	FAM207A	family with sequence similarity 207 member A
chr1	145342618	145343485	868	869	145342899	43	35.063	11.1667	29.8383	C14_peak_34b	Distal Intergenic	1	145154624	145178774	24151	1	512069	NM_001046108	187994	ENSBTAG00000017010	FAM207A	family with sequence similarity 207 member A
chr1	145342618	145343485	868	869	145343173	16	6.0184	3.4343	2.02356	C14_peak_34c	Distal Intergenic	1	145154624	145178774	24151	1	512069	NM_001046108	187994	ENSBTAG00000017010	FAM207A	family with sequence similarity 207 member A
chr1	145344995	145345218	224	225	145345192	49	41.5422	12.3349	36.1318	C14_peak_35	Distal Intergenic	1	145154624	145178774	24151	1	512069	NM_001046108	190371	ENSBTAG00000017010	FAM207A	family with sequence similarity 207 member A
chr1	145347803	145348131	329	330	145347961	82	89.7041	22.3166	83.267	C14_peak_36	Distal Intergenic	1	145154624	145178774	24151	1	512069	NM_001046108	193179	ENSBTAG00000017010	FAM207A	family with sequence similarity 207 member A
chr1	145350331	145350561	231	232	145350417	50	46.6375	14.4127	41.1127	C14_peak_37	Distal Intergenic	1	145154624	145178774	24151	1	512069	NM_001046108	195707	ENSBTAG00000017010	FAM207A	family with sequence similarity 207 member A
chr1	145351459	145351818	360	361	145351639	64	68.0235	19.514	62.0397	C14_peak_38	Distal Intergenic	1	145154624	145178774	24151	1	512069	NM_001046108	196835	ENSBTAG00000017010	FAM207A	family with sequence similarity 207 member A
chr1	145364073	145364486	414	415	145364196	49	11.6333	3.04741	7.14633	C14_peak_39	Distal Intergenic	1	145154624	145178774	24151	1	512069	NM_001046108	209449	ENSBTAG00000017010	FAM207A	family with sequence similarity 207 member A
chr1	145366165	145366870	706	707	145366275	36	24.2257	8.10845	19.2657	C14_peak_40a	Distal Intergenic	1	145154624	145178774	24151	1	512069	NM_001046108	211541	ENSBTAG00000017010	FAM207A	family with sequence similarity 207 member A
chr1	145366165	145366870	706	707	145366451	18	8.03522	4.15031	3.78722	C14_peak_40b	Distal Intergenic	1	145154624	145178774	24151	1	512069	NM_001046108	211541	ENSBTAG00000017010	FAM207A	family with sequence similarity 207 member A
chr1	145366165	145366870	706	707	145366785	26	13.7628	5.53437	9.17169	C14_peak_40c	Distal Intergenic	1	145154624	145178774	24151	1	512069	NM_001046108	211541	ENSBTAG00000017010	FAM207A	family with sequence similarity 207 member A
chr1	145367071	145367507	437	438	145367156	63	51.8545	12.6332	46.2394	C14_peak_41	Distal Intergenic	1	145154624	145178774	24151	1	512069	NM_001046108	212447	ENSBTAG00000017010	FAM207A	family with sequence similarity 207 member A
chr1	145369326	145369524	199	200	145369410	35	21.4859	7.15955	16.6033	C14_peak_42	Distal Intergenic	1	145154624	145178774	24151	1	512069	NM_001046108	214702	ENSBTAG00000017010	FAM207A	family with sequence similarity 207 member A
chr1	145379130	145379402	273	274	145379275	24	14.1626	6.08048	9.54636	C14_peak_43	Distal Intergenic	1	145154624	145178774	24151	1	512069	NM_001046108	224506	ENSBTAG00000017010	FAM207A	family with sequence similarity 207 member A
chr1	145385172	145385651	480	481	145385256	18	10.002	5.13655	5.60965	C14_peak_44a	Distal Intergenic	1	145597292	145610047	12756	2	404083	NM_205782	224396	ENSBTAG00000007818	POFUT2	protein O-fucosyltransferase 2
chr1	145385172	145385651	480	481	145385612	15	6.84301	3.96695	2.73156	C14_peak_44b	Distal Intergenic	1	145597292	145610047	12756	2	404083	NM_205782	224396	ENSBTAG00000007818	POFUT2	protein O-fucosyltransferase 2
chr1	145387144	145387393	250	251	145387320	92	62.3585	10.0498	56.5339	C14_peak_45	Distal Intergenic	1	145597292	145610047	12756	2	404083	NM_205782	222654	ENSBTAG00000007818	POFUT2	protein O-fucosyltransferase 2
chr1	145390765	145390960	196	197	145390918	25	13.8677	5.75393	9.27158	C14_peak_46	Distal Intergenic	1	145597292	145610047	12756	2	404083	NM_205782	219087	ENSBTAG00000007818	POFUT2	protein O-fucosyltransferase 2
chr1	145393700	145393923	224	225	145393785	81	72.5725	15.47	66.4785	C14_peak_47	Distal Intergenic	1	145597292	145610047	12756	2	404083	NM_205782	216124	ENSBTAG00000007818	POFUT2	protein O-fucosyltransferase 2
chr1	145397010	145397277	268	269	145397101	59	63.9848	19.6167	58.1175	C14_peak_48	Distal Intergenic	1	145597292	145610047	12756	2	404083	NM_205782	212770	ENSBTAG00000007818	POFUT2	protein O-fucosyltransferase 2
chr1	145397637	145398153	517	518	145397761	47	30.9223	8.45483	25.8018	C14_peak_49a	Distal Intergenic	1	145597292	145610047	12756	2	404083	NM_205782	211894	ENSBTAG00000007818	POFUT2	protein O-fucosyltransferase 2
chr1	145397637	145398153	517	518	145398133	38	32.1452	11.2925	26.9875	C14_peak_49b	Distal Intergenic	1	145597292	145610047	12756	2	404083	NM_205782	211894	ENSBTAG00000007818	POFUT2	protein O-fucosyltransferase 2
chr1	145401516	145401760	245	246	145401713	63	66.3772	19.1132	60.4463	C14_peak_50	Distal Intergenic	1	145597292	145610047	12756	2	404083	NM_205782	208287	ENSBTAG00000007818	POFUT2	protein O-fucosyltransferase 2
chr1	145404920	145405114	195	196	145405096	23	12.6023	5.52563	8.0691	C14_peak_51	Distal Intergenic	1	145597292	145610047	12756	2	404083	NM_205782	204933	ENSBTAG00000007818	POFUT2	protein O-fucosyltransferase 2
chr1	145408399	145408660	262	263	145408539	30	21.2291	8.15769	16.3523	C14_peak_52	Distal Intergenic	1	145597292	145610047	12756	2	404083	NM_205782	201387	ENSBTAG00000007818	POFUT2	protein O-fucosyltransferase 2
chr1	145412814	145413013	200	201	145412893	34	21.5956	7.40753	16.7083	C14_peak_53	Distal Intergenic	1	145597292	145610047	12756	2	404083	NM_205782	197034	ENSBTAG00000007818	POFUT2	protein O-fucosyltransferase 2
chr1	145431835	145432037	203	204	145431917	66	32.4803	6.23582	27.3122	C14_peak_54	Distal Intergenic	1	145597292	145610047	12756	2	404083	NM_205782	178010	ENSBTAG00000007818	POFUT2	protein O-fucosyltransferase 2
chr1	145442589	145442815	227	228	145442797	56	41.8339	10.5654	36.4139	C14_peak_55	Distal Intergenic	1	145597292	145610047	12756	2	404083	NM_205782	167232	ENSBTAG00000007818	POFUT2	protein O-fucosyltransferase 2
chr1	145447506	145447700	195	196	145447590	46	27.2453	7.33064	22.2235	C14_peak_56	Distal Intergenic	1	145597292	145610047	12756	2	404083	NM_205782	162347	ENSBTAG00000007818	POFUT2	protein O-fucosyltransferase 2
chr1	145450418	145450629	212	213	145450503	64	38.602	8.02002	33.2868	C14_peak_57	Distal Intergenic	1	145597292	145610047	12756	2	404083	NM_205782	159418	ENSBTAG00000007818	POFUT2	protein O-fucosyltransferase 2
chr1	150395444	150395642	199	200	150395628	5	5.04567	4.10659	1.41648	C14_peak_58	Distal Intergenic	1	150360988	150386586	25599	1	511654	NM_001098014	34456	ENSBTAG00000011880	CHAF1B	chromatin assembly factor 1 subunit B
chr1	153228647	153228857	211	212	153228812	17	17.0482	9.50281	12.3034	C14_peak_59	Distal Intergenic	1	153233567	153320510	86944	1	507414	NM_001100314	-4710	ENSBTAG00000020787	PIK3R4	phosphoinositide-3-kinase regulatory subunit 4
chr1	154660449	154660676	228	229	154660535	14	17.4408	10.3141	12.6808	C14_peak_60	Distal Intergenic	1	154440391	154575201	134811	2	529062	NM_001205960	-85248	ENSBTAG00000024815	ANKRD28	ankyrin repeat domain 28
chr10	2014823	2015074	252	253	2014870	5	4.94031	4.05	1.32141	C14_peak_61	Distal Intergenic	10	2161055	2193665	32611	1	100125763	NM_001105045	-145981	ENSBTAG00000011338	NREP	neuronal regeneration related protein
chr10	5126365	5126731	367	368	5126457	20	12.4627	6.04111	7.93476	C14_peak_62	Intron (NM_001046300/529231, intron 2 of 4)	10	5122852	5135400	12549	1	529231	NM_001046300	3513	NA	THOC3	THO complex 3
chr10	28473090	28473505	416	417	28473212	19	11.5317	5.75344	7.05089	C14_peak_63	Intron (NM_001199064/540295, intron 1 of 9)	10	28459345	28509712	50368	1	540295	NM_001199064	13745	ENSBTAG00000006413	KATNBL1	katanin regulatory subunit B1 like 1
chr10	36531911	36532133	223	224	36532006	6	6.77636	5.06687	2.67349	C14_peak_64	Distal Intergenic	10	36522870	36525428	2559	2	538143	NM_001076099	-6483	ENSBTAG00000016291	RHOV	ras homolog family member V
chr10	39689642	39690123	482	483	39689729	52	59.0624	20.1425	53.3096	C14_peak_65	Distal Intergenic	10	39735366	39736135	770	2	538748	NM_001205401	46012	ENSBTAG00000024582	RPL10L	ribosomal protein L10 like
chr10	50069139	50069352	214	215	50069235	5	5.66018	4.41511	1.70514	C14_peak_66	Distal Intergenic	10	49860062	49904536	44475	1	282689	NM_174716	209077	ENSBTAG00000009615	ANXA2	annexin A2
chr10	59505137	59505442	306	307	59505399	9	8.33948	5.85557	4.05292	C14_peak_67	Distal Intergenic	10	59313775	59314272	498	1	790811	NM_001143743	191362	NA	BOLA	MHC class I antigen
chr10	82779398	82779599	202	203	82779557	5	4.9894	4.0765	1.36381	C14_peak_68	Intron (NM_001206852/538340, intron 10 of 11)	10	82728773	82806769	77997	2	538340	NM_001206852	27170	ENSBTAG00000005700	MAP3K9	mitogen-activated protein kinase kinase kinase 9
chr11	1246004	1246202	199	200	1246095	5	5.58946	4.38151	1.70514	C14_peak_69	Distal Intergenic	11	1156936	1199790	42855	2	507390	NM_001075310	-46214	ENSBTAG00000024105	BCL2L11	BCL2 like 11
chr11	16968160	16968376	217	218	16968231	5	5.66018	4.41511	1.70514	C14_peak_70	Distal Intergenic	11	16157514	16173332	15819	2	530070	NM_001083455	-794828	ENSBTAG00000008548	FAM98A	family with sequence similarity 98 member A
chr11	26798786	26799059	274	275	26798868	25	12.9075	5.32497	8.35204	C14_peak_71	Intron (NM_001105641/786620, intron 3 of 10)	11	26602908	27032984	430077	1	786620	NM_001105641	195878	ENSBTAG00000032519	CAMKMT	calmodulin-lysine N-methyltransferase
chr11	27306559	27306778	220	221	27306742	41	41.7914	15.3335	36.3728	C14_peak_72	Distal Intergenic	11	27260022	27263699	3678	2	539492	NM_001205678	-42860	ENSBTAG00000004159	SIX2	SIX homeobox 2
chr11	27308947	27309360	414	415	27309143	22	25.9403	13.3414	20.9475	C14_peak_73	Distal Intergenic	11	27260022	27263699	3678	2	539492	NM_001205678	-45248	ENSBTAG00000004159	SIX2	SIX homeobox 2
chr11	50086881	50087084	204	205	50087073	12	15.7232	9.56607	11.035	C14_peak_74	Distal Intergenic	11	49933204	49934214	1011	2	282385	NM_174623	-152667	ENSBTAG00000005654	TMSB10	thymosin beta 10
chr11	50334147	50334344	198	199	50334318	6	6.10672	4.72501	2.09325	C14_peak_75	Distal Intergenic	11	50400445	50453412	52968	1	509983	NM_001035082	-66101	ENSBTAG00000006075	SUCLG1	succinate-CoA ligase alpha subunit
chr11	55319976	55320202	227	228	55320166	6	5.72672	4.51536	1.75755	C14_peak_76	Intron (NM_001102110/527492, intron 1 of 7)	11	55148151	55149940	1790	2	538452	NM_001080304	-170036	NA	LRRTM1	leucine rich repeat transmembrane neuronal 1
chr11	65326026	65326233	208	209	65326116	11	8.06187	5.36171	3.81034	C14_peak_77	Distal Intergenic	11	65813300	65826761	13462	1	282224	NM_001075128	-487067	ENSBTAG00000011727	ETAA1	Ewing tumor associated antigen 1
chr11	70169663	70169874	212	213	70169760	19	15.7886	8.18184	11.0977	C14_peak_78	Distal Intergenic	11	69688036	69702229	14194	2	780856	NM_001079793	-467434	ENSBTAG00000023744	YPEL5	yippee like 5
chr11	70170608	70170839	232	233	70170699	24	27.3516	13.5381	22.325	C14_peak_79	Distal Intergenic	11	69688036	69702229	14194	2	780856	NM_001079793	-468379	ENSBTAG00000023744	YPEL5	yippee like 5
chr11	70175800	70176091	292	293	70175959	9	9.37085	6.45052	5.01784	C14_peak_80	Distal Intergenic	11	69688036	69702229	14194	2	780856	NM_001079793	-473571	ENSBTAG00000023744	YPEL5	yippee like 5
chr11	74261586	74261796	211	212	74261785	26	31.959	15.5643	26.8055	C14_peak_81	Distal Intergenic	11	74319476	74357422	37947	1	540033	NM_001098109	-57680	ENSBTAG00000018239	DNAJC27	DnaJ heat shock protein family (Hsp40) member C27
chr11	74284320	74284958	639	640	74284432	12	13.2594	8.31455	8.68906	C14_peak_82a	Distal Intergenic	11	74319476	74357422	37947	1	540033	NM_001098109	-34518	ENSBTAG00000018239	DNAJC27	DnaJ heat shock protein family (Hsp40) member C27
chr11	74284320	74284958	639	640	74284856	12	10.3948	6.62265	5.97851	C14_peak_82b	Distal Intergenic	11	74319476	74357422	37947	1	540033	NM_001098109	-34518	ENSBTAG00000018239	DNAJC27	DnaJ heat shock protein family (Hsp40) member C27
chr11	80517545	80517786	242	243	80517635	41	24.2894	7.13851	19.328	C14_peak_83	Distal Intergenic	11	80261889	80266803	4915	1	505949	NM_001075233	255656	ENSBTAG00000023928	RDH14	retinol dehydrogenase 14 (all-trans/9-cis/11-cis)
chr11	99118007	99118244	238	239	99118093	29	30.5257	13.6206	25.4139	C14_peak_84	Distal Intergenic	11	99131533	99179458	47926	1	540108	NM_001114156	-13289	ENSBTAG00000015327	SPTAN1	spectrin alpha, non-erythrocytic 1
chr11	107292025	107292220	196	197	107292127	182	47.3852	3.62701	41.8482	C14_peak_85	Distal Intergenic	11	107260745	107261718	974	1	282255	NM_181867	31280	ENSBTAG00000019015	IFITM3	interferon induced transmembrane protein 3 (1-8U)
chr12	34349539	34350043	505	506	34349622	54	74.2289	27.9094	68.083	C14_peak_86a	Distal Intergenic	12	34177959	34197924	19966	1	540589	NM_001192750	171580	ENSBTAG00000003116	MTMR6	myotubularin related protein 6
chr12	34349539	34350043	505	506	34349955	20	14.5277	7.17723	9.8951	C14_peak_86b	Distal Intergenic	12	34177959	34197924	19966	1	540589	NM_001192750	171580	ENSBTAG00000003116	MTMR6	myotubularin related protein 6
chr12	39231983	39232177	195	196	39232073	16	10.9909	6.09679	6.54218	C14_peak_87	Distal Intergenic	12	36529631	36579771	50141	1	506696	NM_001075277	2702352	ENSBTAG00000003934	PSPC1	paraspeckle component 1
chr12	39477311	39477773	463	464	39477653	16	11.0744	6.14591	6.62226	C14_peak_88	Distal Intergenic	12	36529631	36579771	50141	1	506696	NM_001075277	2947680	ENSBTAG00000003934	PSPC1	paraspeckle component 1
chr12	78951190	78951551	362	363	78951236	6	5.39457	4.32354	1.64753	C14_peak_89	Distal Intergenic	12	79000723	79022946	22224	1	508273	NM_001037817	-49172	ENSBTAG00000039374	IPO5	importin 5
chr12	79834756	79835393	638	639	79834893	73	59.504	12.8785	53.7441	C14_peak_90	Intron (NM_001193099/616045, intron 51 of 52)	12	79691579	79870108	178530	2	616045	NM_001193099	34715	ENSBTAG00000010395	DOCK9	dedicator of cytokinesis 9
chr12	79836210	79836419	210	211	79836304	11	7.34057	4.9091	3.14415	C14_peak_91	Intron (NM_001193099/616045, intron 51 of 52)	12	79691579	79870108	178530	2	616045	NM_001193099	33689	ENSBTAG00000010395	DOCK9	dedicator of cytokinesis 9
chr13	2736822	2737024	203	204	2736954	15	5.81261	3.4442	1.83758	C14_peak_92	Distal Intergenic	13	2474406	2590597	116192	2	513432	NM_001206594	-146225	ENSBTAG00000017679	PAK5	p21 (RAC1) activated kinase 5
chr13	4988370	4988632	263	264	4988415	5	5.66018	4.41511	1.70514	C14_peak_93	Distal Intergenic	13	5424637	5425326	690	2	280931	NM_001014385	436694	ENSBTAG00000047779	SRY	sex determining region Y
chr13	10754651	10755089	439	440	10754991	74	72.5614	17.7188	66.468	C14_peak_94	Distal Intergenic	13	10760673	10763288	2616	1	613456	NM_001037484	-5584	ENSBTAG00000000516	OTOR	otoraplin
chr13	16325287	16325792	506	507	16325361	16	12.4273	6.95456	7.90086	C14_peak_95a	Intron (NM_001102516/534787, intron 5 of 13)	13	16278275	16404468	126194	1	534787	NM_001102516	47012	ENSBTAG00000013004	ITIH5	inter-alpha-trypsin inhibitor heavy chain family member 5
chr13	16325287	16325792	506	507	16325573	32	32.2771	13.5	27.1136	C14_peak_95b	Intron (NM_001102516/534787, intron 5 of 13)	13	16278275	16404468	126194	1	534787	NM_001102516	47012	ENSBTAG00000013004	ITIH5	inter-alpha-trypsin inhibitor heavy chain family member 5
chr13	30267745	30267956	212	213	30267939	6	6.33321	4.84467	2.29677	C14_peak_96	Distal Intergenic	13	30067776	30123390	55615	2	534850	NM_001102180	-144355	ENSBTAG00000008787	FAM171A1	family with sequence similarity 171 member A1
chr13	48076988	48077662	675	676	48077114	24	25.2819	12.3047	20.3025	C14_peak_97a	Distal Intergenic	13	47908389	47915709	7321	2	282431	NM_174640	-161279	ENSBTAG00000015872	PROKR2	prokineticin receptor 2
chr13	48076988	48077662	675	676	48077361	15	12.2605	7.09921	7.74351	C14_peak_97b	Distal Intergenic	13	47908389	47915709	7321	2	282431	NM_174640	-161279	ENSBTAG00000015872	PROKR2	prokineticin receptor 2
chr13	48076988	48077662	675	676	48077558	13	7.73278	4.78482	3.50657	C14_peak_97c	Distal Intergenic	13	47908389	47915709	7321	2	282431	NM_174640	-161279	ENSBTAG00000015872	PROKR2	prokineticin receptor 2
chr13	48081791	48082180	390	391	48082019	72	133.886	51.6742	127.153	C14_peak_98	Distal Intergenic	13	47908389	47915709	7321	2	282431	NM_174640	-166082	ENSBTAG00000015872	PROKR2	prokineticin receptor 2
chr13	49020791	49021216	426	427	49021106	16	15.7431	8.97488	11.0535	C14_peak_99	Distal Intergenic	13	48617012	48665879	48868	2	524427	NM_001206179	-354912	ENSBTAG00000020465	FERMT1	fermitin family member 1
chr13	50357688	50357916	229	230	50357815	6	6.9531	5.15096	2.78874	C14_peak_100	Distal Intergenic	13	49550050	49561304	11255	1	615037	NM_001099141	807638	ENSBTAG00000005111	BMP2	bone morphogenetic protein 2
chr13	61871967	61872177	211	212	61872068	7	8.28175	5.87673	4.01223	C14_peak_101	Intron (NM_001098898/507226, intron 11 of 16)	13	61900820	61915382	14563	1	533378	NM_001083719	-28643	ENSBTAG00000014930	MYLK2	myosin light chain kinase 2
chr13	63821049	63821370	322	323	63821193	34	32.5001	12.8697	27.3311	C14_peak_102	Intron (NM_001128506/616164, intron 1 of 4)	13	63817040	63849783	32744	1	616164	NM_001128506	4009	ENSBTAG00000013387	CHMP4B	charged multivesicular body protein 4B
chr13	83062242	83062449	208	209	83062357	28	21.5583	8.86046	16.6738	C14_peak_103	Distal Intergenic	13	82651610	82804448	152839	1	530813	NM_001075939	410632	NA	DOK5	docking protein 5
chr13	83069594	83069931	338	339	83069794	21	11.5155	5.36137	7.03607	C14_peak_104	Distal Intergenic	13	82651610	82804448	152839	1	530813	NM_001075939	417984	NA	DOK5	docking protein 5
chr13	83070326	83070831	506	507	83070409	36	28.3769	10.0283	23.3175	C14_peak_105a	Distal Intergenic	13	82651610	82804448	152839	1	530813	NM_001075939	418716	NA	DOK5	docking protein 5
chr13	83070326	83070831	506	507	83070766	24	16.1915	7.09477	11.4846	C14_peak_105b	Distal Intergenic	13	82651610	82804448	152839	1	530813	NM_001075939	418716	NA	DOK5	docking protein 5
chr13	83072847	83073212	366	367	83073113	19	10.9213	5.43105	6.47632	C14_peak_106	Distal Intergenic	13	82651610	82804448	152839	1	530813	NM_001075939	421237	NA	DOK5	docking protein 5
chr14	24417	24622	206	207	24527	17	9.54738	5.07763	5.18478	C14_peak_107	Distal Intergenic	14	1487366	1489409	2044	1	513585	NM_001046153	-1462744	ENSBTAG00000000879	C14H8orf33	chromosome 14 open reading frame, human C8orf33
chr14	392898	393105	208	209	392991	96	16.998	2.67324	12.2579	C14_peak_108	Distal Intergenic	14	1487366	1489409	2044	1	513585	NM_001046153	-1094261	ENSBTAG00000000879	C14H8orf33	chromosome 14 open reading frame, human C8orf33
chr14	395861	396162	302	303	396056	38	13.6052	4.09274	9.02026	C14_peak_109	Distal Intergenic	14	1487366	1489409	2044	1	513585	NM_001046153	-1091204	ENSBTAG00000000879	C14H8orf33	chromosome 14 open reading frame, human C8orf33
chr14	443419	443785	367	368	443509	84	11.2555	2.26524	6.78957	C14_peak_110	Distal Intergenic	14	1487366	1489409	2044	1	513585	NM_001046153	-1043581	ENSBTAG00000000879	C14H8orf33	chromosome 14 open reading frame, human C8orf33
chr14	583463	583967	505	506	583543	75	15.0856	2.8438	10.427	C14_peak_111a	Distal Intergenic	14	1487366	1489409	2044	1	513585	NM_001046153	-903399	ENSBTAG00000000879	C14H8orf33	chromosome 14 open reading frame, human C8orf33
chr14	583463	583967	505	506	583814	128	74.7111	8.41446	68.5527	C14_peak_111b	Distal Intergenic	14	1487366	1489409	2044	1	513585	NM_001046153	-903399	ENSBTAG00000000879	C14H8orf33	chromosome 14 open reading frame, human C8orf33
chr14	584427	584719	293	294	584566	32	12.3069	4.22562	7.78788	C14_peak_112	Distal Intergenic	14	1487366	1489409	2044	1	513585	NM_001046153	-902647	ENSBTAG00000000879	C14H8orf33	chromosome 14 open reading frame, human C8orf33
chr14	1341516	1341806	291	292	1341683	15	18.5048	10.7525	13.7079	C14_peak_113	Distal Intergenic	14	1487366	1489409	2044	1	513585	NM_001046153	-145560	ENSBTAG00000000879	C14H8orf33	chromosome 14 open reading frame, human C8orf33
chr14	2189457	2189899	443	444	2189694	98	57.1055	8.15297	51.4044	C14_peak_114	Distal Intergenic	14	2164999	2177242	12244	1	512824	NM_001046133	24458	ENSBTAG00000037493	PUF60	poly(U) binding splicing factor 60
chr14	3126626	3126839	214	215	3126768	8	8.27756	5.89864	4.00833	C14_peak_115	Intron (NM_001082446/535306, intron 10 of 13)	14	3054763	3171547	116785	1	535306	NM_001082446	71863	ENSBTAG00000009974	TSNARE1	t-SNARE domain containing 1
chr14	18655638	18655852	215	216	18655758	5	4.9894	4.0765	1.36381	C14_peak_116	Distal Intergenic	14	18368120	18389396	21277	2	515040	NM_001206406	-266242	ENSBTAG00000026309	ZHX2	zinc fingers and homeoboxes 2
chr14	33405579	33405799	221	222	33405673	174	32.1991	2.83785	27.0402	C14_peak_117	Intron (NM_173997/281022, intron 32 of 38)	14	33343882	33480410	136529	2	281022	NM_173997	74611	ENSBTAG00000014691	ARFGEF1	ADP ribosylation factor guanine nucleotide exchange factor 1
chr14	33840407	33840910	504	505	33840499	11	13.8907	8.70304	9.29218	C14_peak_118a	Distal Intergenic	14	34040796	34340573	299778	1	520704	NM_001192526	-199886	ENSBTAG00000022169	PREX2	phosphatidylinositol-3,4,5-trisphosphate dependent Rac exchange factor 2
chr14	33840407	33840910	504	505	33840845	21	30.3495	15.8934	25.2446	C14_peak_118b	Distal Intergenic	14	34040796	34340573	299778	1	520704	NM_001192526	-199886	ENSBTAG00000022169	PREX2	phosphatidylinositol-3,4,5-trisphosphate dependent Rac exchange factor 2
chr14	34324618	34324819	202	203	34324701	7	6.04209	4.66237	2.04461	C14_peak_119	Intron (NM_001192526/520704, intron 38 of 39)	14	34427579	34830956	403378	1	615152	NM_001199131	-102760	ENSBTAG00000022588	C14H8orf34	chromosome 14 open reading frame, human C8orf34
chr14	40547023	40547453	431	432	40547260	13	11.1677	6.89064	6.70715	C14_peak_120	Distal Intergenic	14	40420996	40471465	50470	1	536186	NM_001101165	126027	ENSBTAG00000004411	CRISPLD1	cysteine rich secretory protein LCCL domain containing 1
chr14	43042294	43042822	529	530	43042390	20	8.86621	4.26775	4.54628	C14_peak_121a	Distal Intergenic	14	42315038	42330314	15277	2	512677	NM_001100348	-711980	ENSBTAG00000003885	PEX2	peroxisomal biogenesis factor 2
chr14	43042294	43042822	529	530	43042718	33	14.4569	4.82976	9.82873	C14_peak_121b	Distal Intergenic	14	42315038	42330314	15277	2	512677	NM_001100348	-711980	ENSBTAG00000003885	PEX2	peroxisomal biogenesis factor 2
chr14	43043550	43043817	268	269	43043667	51	36.3105	9.62589	31.0596	C14_peak_122	Distal Intergenic	14	42315038	42330314	15277	2	512677	NM_001100348	-713236	ENSBTAG00000003885	PEX2	peroxisomal biogenesis factor 2
chr14	51954391	51954626	236	237	51954596	30	47.8593	22.8114	42.3058	C14_peak_123	Distal Intergenic	14	52949756	52950968	1213	1	100125936	NM_001105499	-995130	ENSBTAG00000039068	CSMD3	CUB and Sushi multiple domains 3
chr14	55246255	55246467	213	214	55246351	7	7.33026	5.40001	3.13514	C14_peak_124	Distal Intergenic	14	56652421	56658519	6099	1	505732	NM_001166560	-1405954	ENSBTAG00000008512	KCNV1	potassium voltage-gated channel modifier subfamily V member 1
chr14	61713263	61713467	205	206	61713347	6	6.9531	5.15096	2.78874	C14_peak_125	Distal Intergenic	14	62215198	62305653	90456	1	519993	NM_001192981	-501731	ENSBTAG00000011516	LRP12	LDL receptor related protein 12
chr15	26600004	26600414	411	412	26600100	11	7.09457	4.75549	2.91969	C14_peak_126	Distal Intergenic	15	26101329	26451530	350202	2	529873	NM_001038558	-148474	ENSBTAG00000000977	CADM1	cell adhesion molecule 1
chr15	30885741	30885991	251	252	30885895	28	43.69	21.1982	38.2275	C14_peak_127	Distal Intergenic	15	30743500	30811461	67962	2	533492	NM_001206022	-74280	ENSBTAG00000015939	PVRL1	poliovirus receptor-related 1 (herpesvirus entry mediator C)
chr15	63933534	63933778	245	246	63933752	6	6.92347	5.13705	2.78874	C14_peak_128	Distal Intergenic	15	64095495	64112929	17435	1	515543	NM_001035312	-161717	ENSBTAG00000005338	EIF3M	eukaryotic translation initiation factor 3 subunit M
chr15	71059945	71060572	628	629	71060079	55	67.2309	23.3132	61.2753	C14_peak_129a	Distal Intergenic	15	72466675	72475916	9242	1	534309	NM_001076019	-1406103	ENSBTAG00000037580	MSANTD3	Myb/SANT DNA binding domain containing 3
chr15	71059945	71060572	628	629	71060554	22	10.9546	4.92827	6.50822	C14_peak_129b	Distal Intergenic	15	72466675	72475916	9242	1	534309	NM_001076019	-1406103	ENSBTAG00000037580	MSANTD3	Myb/SANT DNA binding domain containing 3
chr15	71060786	71061095	310	311	71060891	29	9.31359	3.53052	4.96401	C14_peak_130	Distal Intergenic	15	72466675	72475916	9242	1	534309	NM_001076019	-1405580	ENSBTAG00000037580	MSANTD3	Myb/SANT DNA binding domain containing 3
chr15	71063376	71063946	571	572	71063627	30	9.93421	3.64821	5.54486	C14_peak_131	Distal Intergenic	15	72466675	72475916	9242	1	534309	NM_001076019	-1402729	ENSBTAG00000037580	MSANTD3	Myb/SANT DNA binding domain containing 3
chr16	10675265	10675487	223	224	10675379	18	9.86495	5.06489	5.47926	C14_peak_132	Distal Intergenic	16	9511460	9514186	2727	2	613499	NM_001078034	-1161079	ENSBTAG00000018361	R3HDM2	R3H domain containing 2
chr16	10675814	10676045	232	233	10676032	39	61.5565	27.3773	55.7437	C14_peak_133	Distal Intergenic	16	9511460	9514186	2727	2	613499	NM_001078034	-1161628	ENSBTAG00000018361	R3HDM2	R3H domain containing 2
chr16	13804660	13804906	247	248	13804790	47	21.6479	5.47167	16.7585	C14_peak_134	Distal Intergenic	16	13744181	13774629	30449	2	613624	NM_001192971	-30031	ENSBTAG00000013064	RGS18	regulator of G-protein signaling 18
chr16	13805227	13805432	206	207	13805319	15	8.38551	4.80151	4.09662	C14_peak_135	Distal Intergenic	16	13744181	13774629	30449	2	613624	NM_001192971	-30598	ENSBTAG00000013064	RGS18	regulator of G-protein signaling 18
chr16	18932578	18933102	525	526	18932666	20	23.4062	12.442	18.4679	C14_peak_136	Distal Intergenic	16	19500370	19572455	72086	1	505221	NM_001191424	-567268	ENSBTAG00000006186	KCTD3	potassium channel tetramerization domain containing 3
chr16	19159748	19160109	362	363	19159901	30	46.004	21.9438	40.4909	C14_peak_137	Distal Intergenic	16	19500370	19572455	72086	1	505221	NM_001191424	-340261	ENSBTAG00000006186	KCTD3	potassium channel tetramerization domain containing 3
chr16	19161489	19162446	958	959	19161590	10	12.6383	8.09437	8.09682	C14_peak_138a	Distal Intergenic	16	19500370	19572455	72086	1	505221	NM_001191424	-337924	ENSBTAG00000006186	KCTD3	potassium channel tetramerization domain containing 3
chr16	19161489	19162446	958	959	19161976	11	14.1634	8.83022	9.54636	C14_peak_138b	Distal Intergenic	16	19500370	19572455	72086	1	505221	NM_001191424	-337924	ENSBTAG00000006186	KCTD3	potassium channel tetramerization domain containing 3
chr16	19161489	19162446	958	959	19162265	88	175.972	65.4908	168.834	C14_peak_138c	Distal Intergenic	16	19500370	19572455	72086	1	505221	NM_001191424	-337924	ENSBTAG00000006186	KCTD3	potassium channel tetramerization domain containing 3
chr16	41747970	41748191	222	223	41748024	7	6.17016	4.73982	2.14898	C14_peak_139	Distal Intergenic	16	41689563	41709076	19514	2	539800	NM_001205715	-38894	ENSBTAG00000002894	TNFSF4	tumor necrosis factor superfamily member 4
chr16	62657676	62657877	202	203	62657731	5	5.66018	4.41511	1.70514	C14_peak_140	Distal Intergenic	16	62533723	62545570	11848	1	782528	NM_001080344	123953	ENSBTAG00000035226	TOR1AIP1	torsin 1A interacting protein 1
chr16	62819594	62819791	198	199	62819742	7	7.33026	5.40001	3.13514	C14_peak_141	Intron (NM_001102074/522986, intron 2 of 12)	16	62804447	62845819	41373	1	522986	NM_001102074	15147	ENSBTAG00000014191	QSOX1	quiescin sulfhydryl oxidase 1
chr16	69553733	69553966	234	235	69553908	11	9.26202	6.11322	4.91591	C14_peak_142	Intron (NM_001075864/525072, intron 8 of 17)	16	69443238	69620712	177475	1	525072	NM_001075864	110495	ENSBTAG00000013298	PLA2G4A	phospholipase A2, group IVA (cytosolic, calcium-dependent)
chr16	72111947	72112161	215	216	72112108	5	5.536	4.35578	1.70514	C14_peak_143	Distal Intergenic	16	72241105	72445379	204275	2	533192	NM_001193022	333218	ENSBTAG00000001181	RPS6KC1	ribosomal protein S6 kinase C1
chr16	77966438	77966648	211	212	77966533	6	6.54938	4.95506	2.4746	C14_peak_144	Intron (NM_001206506/534849, intron 21 of 27)	16	77923518	77988157	64640	2	534849	NM_001206506	21509	ENSBTAG00000007860	ASPM	abnormal spindle microtubule assembly
chr17	4441113	4441355	243	244	4441211	25	19.6419	8.682	14.8114	C14_peak_145	Distal Intergenic	17	4308228	4436083	127856	2	538617	NM_001083735	-5030	ENSBTAG00000008816	TRIM2	tripartite motif containing 2
chr17	9727421	9727797	377	378	9727670	26	38.5877	19.1124	33.2727	C14_peak_146	Distal Intergenic	17	9742222	10173557	431336	1	537614	NM_001191349	-14425	ENSBTAG00000027182	NR3C2	nuclear receptor subfamily 3 group C member 2
chr17	9728042	9728257	216	217	9728133	12	15.7232	9.56607	11.035	C14_peak_147	Distal Intergenic	17	9742222	10173557	431336	1	537614	NM_001191349	-13965	ENSBTAG00000027182	NR3C2	nuclear receptor subfamily 3 group C member 2
chr17	18808596	18808804	209	210	18808795	7	8.30336	5.88682	4.01971	C14_peak_148	Intron (NM_001191138/613439, intron 1 of 9)	17	18785461	18885245	99785	1	613439	NM_001191138	23135	ENSBTAG00000020594	ELF2	E74 like ETS transcription factor 2
chr17	37885447	37885757	311	312	37885632	6	6.9531	5.15096	2.78874	C14_peak_149	Intron (NM_001206863/782831, intron 9 of 14)	17	37149472	38027600	878129	1	782831	NM_001206863	735975	NA	FSTL5	follistatin like 5
chr17	52498382	52498686	305	306	52498590	7	6.89272	5.16042	2.77408	C14_peak_150	Distal Intergenic	17	52974078	53027510	53433	2	505842	NM_001163929	528824	ENSBTAG00000005678	AACS	acetoacetyl-CoA synthetase
chr17	69004440	69004650	211	212	69004543	7	8.13578	5.80771	3.87613	C14_peak_151	Distal Intergenic	17	68524673	68530931	6259	1	282204	NM_174525	479767	ENSBTAG00000019282	CRYBA4	crystallin beta A4
chr17	73110571	73110784	214	215	73110677	9	9.92372	6.75001	5.53499	C14_peak_152	Intron (NM_001319884/100297192, intron 4 of 5)	17	73020122	73021815	1694	2	518200	NM_001192483	-88756	ENSBTAG00000046083	ZNF280A	zinc finger protein 280A
chr18	33454460	33455035	576	577	33454594	16	13.7908	7.78506	9.19801	C14_peak_153a	Distal Intergenic	18	32798824	32888927	90104	2	785475	NM_001081624	-565533	ENSBTAG00000032092	CDH11	cadherin 11
chr18	33454460	33455035	576	577	33454934	34	16.3545	5.36202	11.6385	C14_peak_153b	Distal Intergenic	18	32798824	32888927	90104	2	785475	NM_001081624	-565533	ENSBTAG00000032092	CDH11	cadherin 11
chr18	33456110	33456361	252	253	33456220	13	10.1935	6.28702	5.78693	C14_peak_154	Distal Intergenic	18	32798824	32888927	90104	2	785475	NM_001081624	-567183	ENSBTAG00000032092	CDH11	cadherin 11
chr18	33459999	33460235	237	238	33460124	12	8.80855	5.63533	4.49262	C14_peak_155	Distal Intergenic	18	32798824	32888927	90104	2	785475	NM_001081624	-571072	ENSBTAG00000032092	CDH11	cadherin 11
chr18	56825936	56826138	203	204	56826032	5	5.536	4.35578	1.70514	C14_peak_156	Exon (NM_001110097/784290, exon 3 of 7)	18	56811421	56830015	18595	2	784290	NM_001110097	3877	ENSBTAG00000044113	IZUMO2	IZUMO family member 2
chr18	62059756	62059955	200	201	62059845	6	6.10672	4.72501	2.09325	C14_peak_157	Distal Intergenic	18	62028038	62047353	19316	1	282002	NM_001166502	31718	ENSBTAG00000013550	PRKCG	protein kinase C gamma
chr19	9366588	9366786	199	200	9366745	6	5.85588	4.58783	1.87608	C14_peak_158	Distal Intergenic	19	9378328	9393123	14796	2	101905689	NM_001031766	26337	ENSBTAG00000034963	MKS1	Meckel syndrome, type 1
chr19	10217866	10218072	207	208	10217938	6	6.70565	5.03249	2.61047	C14_peak_159	Intron (NM_001110182/617078, intron 8 of 24)	19	10165552	10317934	152383	2	617078	NM_001110182	99862	ENSBTAG00000021677	TRIM37	tripartite motif containing 37
chr19	61931170	61931628	459	460	61931320	14	14.0369	8.41787	9.43083	C14_peak_160	Distal Intergenic	19	61708769	61814973	106205	2	286883	NM_001034045	-116197	ENSBTAG00000001609	MAP2K6	mitogen-activated protein kinase kinase 6
chr19	62369221	62369428	208	209	62369308	7	6.89272	5.16042	2.77408	C14_peak_161	Promoter (<=1kb)	19	62368395	62401914	33520	1	513067	NM_001101967	826	ENSBTAG00000010637	ARSG	arylsulfatase G	TGAAGAAATCCATCCATCCATCCATCCACGCCTTCATCCATCCATCCTTT CATCTATCCATCCCTTCATCCATCCATCCATTCATCTATCCATCCATCCA TTGCTTCATCTATCCATCCATCCCTCCATCCATCCATCTGTCCATCTATC TATTAATCTATCCATCCATCCATCACTTCATCTGTCCATCCATCCATCCA TCCATCCA
chr2	64966747	64966979	233	234	64966912	7	7.33026	5.40001	3.13514	C14_peak_162	Distal Intergenic	2	65216983	65279810	62828	1	533675	NM_001046359	-250004	ENSBTAG00000005234	LYPD1	LY6/PLAUR domain containing 1
chr2	73825780	73825989	210	211	73825899	18	10.2318	5.2577	5.82441	C14_peak_163	Promoter (1-2kb)	2	73827107	73834529	7423	1	509943	NM_001075422	-1118	ENSBTAG00000006059	TSN	translin	AGAAAGTAGGCAGACTCTGGTTTTGGGGGTATATGCTCGAGAATTTCCAG GGGGACTCCTGAAGCTCGATCCCGCCTTTGCGTATGCCGAGCCTCCTTCC TCATGGCCTTTGTCATGGGCGGAGTTCCTCACGGGCTCCCAGCAGTGATA GAATTCCAGTGGAGCTATTCCAGATCCTGAAAGATGATGCTGTGGAAAGT GCTGCACTCA
chr2	73826344	73826605	262	263	73826580	23	11.4967	5.01771	7.01861	C14_peak_164	Promoter (<=1kb)	2	73827107	73834529	7423	1	509943	NM_001075422	-502	ENSBTAG00000006059	TSN	translin	GAAGTCCGCTTGCCTCTCGAGGTGTTCCCGGGGAGACAGGCCACTTGTCG AGCGGTATTTGGAACCTGGGGGTCTTTTCCCGACGATGCACGGGCGAGTC ACTGCCCCTTCGTGTTGACTTCATTCACAGGGTGGAGTTCGAAGAGGTGT CCGGGCATCGGGTTCTTATCAAGAGGGCACCGGGAAATCGGGGTCCTTCG GAACGTGGAACCACCCACGAGGCCACGTCTGGAATGTCGTCGTGAGACCG GCCTCATCCTGA
chr2	80661927	80662222	296	297	80662005	6	6.9531	5.15096	2.78874	C14_peak_165	Distal Intergenic	2	80641459	80650246	8788	1	613474	NM_001098124	20468	ENSBTAG00000018653	NABP1	nucleic acid binding protein 1
chr2	85910077	85910294	218	219	85910272	5	5.23103	4.20356	1.56251	C14_peak_166	Promoter (<=1kb)	2	85835325	85909951	74627	2	504677	NM_001205550	-126	ENSBTAG00000020416	PGAP1	post-GPI attachment to proteins 1	TAATCGCCTCCCTCTCTCTCTCCAGGTTAGCCCACCAGACGCCCACTCTC AGTCCTTCCCTCTCCTCGGCTCTAGGGCTCCCGCGCTCTCCCATGCCTCT CTCGTCCCCCCTTTACCGCTCTTCTTTCTCTCCAGCCGGCCTCTCATTGC CCTCCCCTTGCCTTTCCTCCTTTTCCTTTTCCTTGCGCCCTCACCTCACT CTCCAGCCCAGCCCACTC
chr2	100164755	100165198	444	445	100164841	20	15.4761	7.72181	10.8007	C14_peak_167a	Distal Intergenic	2	98758036	98898492	140457	1	510506	NM_001192258	1406719	ENSBTAG00000016662	CPS1	carbamoyl-phosphate synthase 1
chr2	100164755	100165198	444	445	100165102	30	36.8456	16.9826	31.5782	C14_peak_167b	Distal Intergenic	2	98758036	98898492	140457	1	510506	NM_001192258	1406719	ENSBTAG00000016662	CPS1	carbamoyl-phosphate synthase 1
chr2	104873778	104874028	251	252	104874017	5	5.60755	4.39015	1.70514	C14_peak_168	Intron (NM_001205491/527624, intron 3 of 3)	2	104975964	104987392	11429	1	615159	NM_001191546	-101936	ENSBTAG00000026788	SHOX	short stature homeobox
chr2	122017819	122018051	233	234	122018006	5	5.22332	4.19959	1.55562	C14_peak_169	Intron (NM_001035026/505545, intron 5 of 10)	2	122007089	122029844	22756	1	505545	NM_001253722	10730	ENSBTAG00000020655	BSDC1	BSD domain containing 1
chr2	133350904	133351102	199	200	133351015	14	9.5211	5.6587	5.15965	C14_peak_170	Distal Intergenic	2	133373263	133376607	3345	1	506243	NM_001192086	-22161	ENSBTAG00000004418	PLA2G2E	phospholipase A2 group IIE
chr20	2990509	2990703	195	196	2990597	13	15.5793	9.45001	10.8979	C14_peak_171	Distal Intergenic	20	2985699	2986539	841	2	287022	NM_174814	-3970	ENSBTAG00000000236	YWHAZ	tyrosine 3-monooxygenase/tryptophan 5-monooxygenase activation protein zeta
chr20	3224083	3224277	195	196	3224173	8	8.10916	5.80547	3.85242	C14_peak_172	Distal Intergenic	20	3159149	3159606	458	1	337888	NM_001037443	64934	ENSBTAG00000020733	RPS15A	ribosomal protein S15a
chr20	39860708	39860925	218	219	39860914	10	12.6383	8.09437	8.09682	C14_peak_173	Distal Intergenic	20	39913085	40304028	390944	1	525276	NM_001192609	-52160	ENSBTAG00000012558	ADAMTS12	ADAM metallopeptidase with thrombospondin type 1 motif 12
chr20	47882242	47882489	248	249	47882298	5	5.66018	4.41511	1.70514	C14_peak_174	Distal Intergenic	20	48874612	49060950	186339	1	541259	NM_001076266	-992123	ENSBTAG00000002845	CDH10	cadherin 10
chr20	50853645	50853855	211	212	50853735	7	8.15965	5.8191	3.89819	C14_peak_175	Distal Intergenic	20	51282707	51624351	341645	1	540672	NM_001206958	-428852	NA	CDH12	cadherin 12
chr21	2024623	2024946	324	325	2024658	13	5.89502	3.73203	1.91077	C14_peak_176	Distal Intergenic	21	2346809	2410193	63385	2	533136	NM_001098462	385247	ENSBTAG00000002487	UBE3A	ubiquitin protein ligase E3A
chr21	14174722	14174971	250	251	14174796	7	5.33753	4.22347	1.61101	C14_peak_177	Distal Intergenic	21	14390571	14420462	29892	2	535026	NM_001102181	245491	ENSBTAG00000017776	CHD2	chromodomain helicase DNA binding protein 2
chr21	19878085	19878428	344	345	19878181	24	10.5411	4.46654	6.1159	C14_peak_178	Intron (NM_001035078/509816, intron 3 of 5)	21	19867700	19898711	31012	1	509816	NM_001035078	10385	ENSBTAG00000019831	MRPS11	mitochondrial ribosomal protein S11
chr21	19887621	19888115	495	496	19887766	38	20.8995	6.40402	16.0318	C14_peak_179a	Intron (NM_001035078/509816, intron 3 of 5)	21	19867700	19898711	31012	1	509816	NM_001035078	19921	ENSBTAG00000019831	MRPS11	mitochondrial ribosomal protein S11
chr21	19887621	19888115	495	496	19887977	37	20.8146	6.53505	15.9483	C14_peak_179b	Intron (NM_001035078/509816, intron 3 of 5)	21	19867700	19898711	31012	1	509816	NM_001035078	19921	ENSBTAG00000019831	MRPS11	mitochondrial ribosomal protein S11
chr21	49027029	49027229	201	202	49027166	7	8.30336	5.88682	4.01971	C14_peak_180	Distal Intergenic	21	48843725	48845622	1898	2	509367	NM_001077890	-181407	ENSBTAG00000006130	CLEC14A	C-type lectin domain family 14 member A
chr21	56325811	56326047	237	238	56325917	14	6.1863	3.75669	2.16432	C14_peak_181	Intron (NM_001206201/615161, intron 13 of 13)	21	56048403	56400900	352498	2	615161	NM_001206201	74853	ENSBTAG00000017216	FRMD5	FERM domain containing 5
chr21	56331823	56332315	493	494	56331905	18	22.4033	12.3436	17.4917	C14_peak_182a	Intron (NM_001206201/615161, intron 13 of 13)	21	56048403	56400900	352498	2	615161	NM_001206201	68585	ENSBTAG00000017216	FRMD5	FERM domain containing 5
chr21	56331823	56332315	493	494	56332273	30	34.8281	15.7925	29.6064	C14_peak_182b	Intron (NM_001206201/615161, intron 13 of 13)	21	56048403	56400900	352498	2	615161	NM_001206201	68585	ENSBTAG00000017216	FRMD5	FERM domain containing 5
chr21	57557263	57557490	228	229	57557400	7	8.12391	5.80203	3.86579	C14_peak_183	Distal Intergenic	21	57596461	57783306	186846	1	615739	NM_001193088	-38971	ENSBTAG00000006620	SLC24A4	solute carrier family 24 member 4
chr22	2872396	2872645	250	251	2872515	14	10.5975	6.31404	6.16903	C14_peak_184	Distal Intergenic	22	2766407	2807380	40974	2	767932	NM_001077005	-65016	ENSBTAG00000004117	AZI2	5-azacytidine induced 2
chr22	15249915	15250142	228	229	15249962	5	4.92096	4.0395	1.32141	C14_peak_185	Promoter (<=1kb)	22	15245986	15250839	4854	2	523887	NM_001077959	697	ENSBTAG00000018601	LYZL4	lysozyme like 4	GAGAAAGGAAACGTGCAAGGTGAATGTGACGGTGTGAAGGTGAACGAGGG GGAAAGAGGTGTGAAAGGAGAGGCTCTCTGAGGCTAAGGGACTTCTCTGC CATTTCCAGTGAATCAGTGGCATGTCTGGACTGGACCAGGTCTCCCTGTG AGGACAAGAGACAAGGTCCCTGGAGTTTTGTTTGTAGAAAATCTGGGGTC AAGACAGGATAAAGGTTAAGGCCACAGC
chr22	15350870	15351073	204	205	15350974	14	11.5726	6.91465	7.08829	C14_peak_186	Distal Intergenic	22	15327002	15345250	18249	2	614905	NM_001046546	-5620	ENSBTAG00000006570	SEC22C	SEC22 homolog C, vesicle trafficking protein
chr22	42401884	42402105	222	223	42401995	22	13.015	5.9143	8.45483	C14_peak_187	Distal Intergenic	22	43354328	43359047	4720	1	538515	NM_001083488	-952223	ENSBTAG00000046763	FAM107A	family with sequence similarity 107 member A
chr22	42402575	42403186	612	613	42402965	55	55.1876	16.7734	49.5152	C14_peak_188	Distal Intergenic	22	43354328	43359047	4720	1	538515	NM_001083488	-951142	ENSBTAG00000046763	FAM107A	family with sequence similarity 107 member A
chr22	42403912	42404380	469	470	42403986	31	10.7683	3.82786	6.33153	C14_peak_189a	Distal Intergenic	22	43354328	43359047	4720	1	538515	NM_001083488	-949948	ENSBTAG00000046763	FAM107A	family with sequence similarity 107 member A
chr22	42403912	42404380	469	470	42404349	20	9.77634	4.68937	5.39416	C14_peak_189b	Distal Intergenic	22	43354328	43359047	4720	1	538515	NM_001083488	-949948	ENSBTAG00000046763	FAM107A	family with sequence similarity 107 member A
chr22	42410948	42411275	328	329	42411179	27	30.1393	14.1407	25.0379	C14_peak_190	Distal Intergenic	22	43354328	43359047	4720	1	538515	NM_001083488	-943053	ENSBTAG00000046763	FAM107A	family with sequence similarity 107 member A
chr22	42417197	42417582	386	387	42417514	13	9.89543	6.1023	5.5081	C14_peak_191	Distal Intergenic	22	43354328	43359047	4720	1	538515	NM_001083488	-936746	ENSBTAG00000046763	FAM107A	family with sequence similarity 107 member A
chr22	42419895	42420162	268	269	42419983	20	26.1864	13.9734	21.1868	C14_peak_192	Distal Intergenic	22	43354328	43359047	4720	1	538515	NM_001083488	-934166	ENSBTAG00000046763	FAM107A	family with sequence similarity 107 member A
chr22	42421342	42421611	270	271	42421428	28	39.9157	19.3486	34.5561	C14_peak_193	Distal Intergenic	22	43354328	43359047	4720	1	538515	NM_001083488	-932717	ENSBTAG00000046763	FAM107A	family with sequence similarity 107 member A
chr22	42428058	42428348	291	292	42428204	20	15.0872	7.497	10.4281	C14_peak_194	Distal Intergenic	22	43354328	43359047	4720	1	538515	NM_001083488	-925980	ENSBTAG00000046763	FAM107A	family with sequence similarity 107 member A
chr22	42436186	42436455	270	271	42436289	36	28.6413	10.1583	23.5765	C14_peak_195	Distal Intergenic	22	43354328	43359047	4720	1	538515	NM_001083488	-917873	ENSBTAG00000046763	FAM107A	family with sequence similarity 107 member A
chr22	42436983	42437206	224	225	42437074	23	14.3015	6.35396	9.67885	C14_peak_196	Distal Intergenic	22	43354328	43359047	4720	1	538515	NM_001083488	-917122	ENSBTAG00000046763	FAM107A	family with sequence similarity 107 member A
chr22	45491707	45491915	209	210	45491813	11	12.3449	7.92084	7.82206	C14_peak_197	Intron (NM_001102195/537173, intron 7 of 9)	22	45094510	45555747	461238	1	537173	NM_001102195	397197	ENSBTAG00000010029	ERC2	ELKS/RAB6-interacting/CAST family member 2
chr22	45492884	45493123	240	241	45493077	28	13.7936	5.23497	9.20058	C14_peak_198	Intron (NM_001102195/537173, intron 7 of 9)	22	45094510	45555747	461238	1	537173	NM_001102195	398374	ENSBTAG00000010029	ERC2	ELKS/RAB6-interacting/CAST family member 2
chr22	53155497	53155714	218	219	53155667	24	34.532	17.4818	29.3157	C14_peak_199	Distal Intergenic	22	53110763	53147115	36353	1	617519	NM_001076466	44734	ENSBTAG00000011311	CCDC12	coiled-coil domain containing 12
chr22	59713543	59713745	203	204	59713642	20	17.8085	9.10323	13.0359	C14_peak_200	Downstream (2-3kb)	22	59715774	59732131	16358	2	783414	NM_001191173	18386	ENSBTAG00000030915	ISY1	ISY1 splicing factor homolog (S. cerevisiae)
chr23	9207866	9208064	199	200	9207959	9	10.9396	7.25963	6.4941	C14_peak_201	Distal Intergenic	23	9237764	9263844	26081	1	516457	NM_001098994	-29700	ENSBTAG00000025622	DEF6	DEF6, guanine nucleotide exchange factor
chr23	15308738	15308951	214	215	15308907	5	4.92771	4.04317	1.32141	C14_peak_202	Distal Intergenic	23	15391990	15425378	33389	1	517805	NM_001205524	-83039	ENSBTAG00000014211	FOXP4	forkhead box P4
chr23	19224597	19224796	200	201	19224748	6	6.9531	5.15096	2.78874	C14_peak_203	Intron (NM_174276/281696, intron 5 of 5)	23	19167358	19333272	165915	2	281696	NM_174276	108476	ENSBTAG00000010244	CLIC5	chloride intracellular channel 5
chr23	19993234	19993468	235	236	19993446	56	67.5741	23.0065	61.5947	C14_peak_204	Distal Intergenic	23	19907158	19945051	37894	2	282311	NM_174578	-48183	ENSBTAG00000019315	PLA2G7	phospholipase A2 group VII
chr23	24977730	24977928	199	200	24977834	7	8.30336	5.88682	4.01971	C14_peak_205	Promoter (<=1kb)	23	24963227	24977291	14065	2	533917	NM_001015651	-439	ENSBTAG00000004288	GSTA4	glutathione S-transferase alpha 4	CTGGAGTCTTGGAAGCTTGACTACCCTACGTTCTCCTACAAATGGACCTT GAGAGCTTGTTTGGAGGTTCTAGCAGGGGAGCGCAGCTACTCGTATACCC TTGACCGAAGACCGGTCCTCCTCTAGCGGGGATGGTCGTCCTCTTCGACC GAGCGCGCAGCTTCGGGAGGGACGCACATGGAGCGGTGAGGGAGGAAGG
chr23	52468754	52468978	225	226	52468879	15	20.5863	11.7736	15.7272	C14_peak_206	Distal Intergenic	23	52050985	52063706	12722	2	506141	NM_001206162	-405048	ENSBTAG00000002929	IRF4	interferon regulatory factor 4
chr24	8670236	8670474	239	240	8670323	49	42.6759	12.8572	37.2344	C14_peak_207	Distal Intergenic	24	8748241	8785476	37236	1	615687	NM_001102289	-77767	ENSBTAG00000007567	TMX3	thioredoxin related transmembrane protein 3
chr24	28797361	28797580	220	221	28797441	7	8.30336	5.88682	4.01971	C14_peak_208	Distal Intergenic	24	28992666	29241119	248454	1	281062	NM_001166492	-195086	ENSBTAG00000021190	CDH2	cadherin 2, type 1, N-cadherin (neuronal)
chr24	32685740	32685936	197	198	32685794	5	5.58946	4.38151	1.70514	C14_peak_209	Distal Intergenic	24	32611656	32646496	34841	2	517248	NM_001102501	-39244	ENSBTAG00000003035	IMPACT	impact RWD domain protein
chr24	35875172	35875402	231	232	35875381	36	57.5349	26.191	51.8072	C14_peak_210	Distal Intergenic	24	35870001	35870884	884	1	512850	NM_001079506	5171	ENSBTAG00000012320	CETN1	centrin 1
chr24	48491962	48492332	371	372	48492079	22	20.5735	10.1444	15.7177	C14_peak_211a	Distal Intergenic	24	47971045	48022060	51016	2	516010	NM_001046218	-469902	ENSBTAG00000039916	SMAD2	SMAD family member 2
chr24	48491962	48492332	371	372	48492266	13	8.55943	5.28145	4.26021	C14_peak_211b	Distal Intergenic	24	47971045	48022060	51016	2	516010	NM_001046218	-469902	ENSBTAG00000039916	SMAD2	SMAD family member 2
chr24	56959111	56959476	366	367	56959465	19	15.6497	8.09888	10.9665	C14_peak_212	Distal Intergenic	24	57125861	57134072	8212	1	414349	NM_001001599	-166385	ENSBTAG00000007347	ST8SIA3	ST8 alpha-N-acetyl-neuraminide alpha-2,8-sialyltransferase 3
chr25	8398	8640	243	244	8529	8	8.87648	6.21726	4.55568	C14_peak_213	Distal Intergenic	25	110167	112894	2728	2	618296	NM_001046617	104254	ENSBTAG00000019803	POLR3K	RNA polymerase III subunit K
chr25	4827117	4827500	384	385	4827352	31	19.9516	7.32205	15.1123	C14_peak_214	Distal Intergenic	25	5417264	6686802	1269539	1	521304	NM_001075818	-589764	ENSBTAG00000007210	RBFOX1	RNA binding protein, fox-1 homolog 1
chr25	12924067	12924405	339	340	12924130	5	5.22332	4.19959	1.55562	C14_peak_215	Promoter (<=1kb)	25	12923482	12964785	41304	1	516371	NM_001205360	585	ENSBTAG00000021773	ERCC4	ERCC excision repair 4, endonuclease catalytic subunit	GAGGTCTCTGGAGAGGGTGGGAGGATTCTTGGAGGAGGATATGGGTGGGA ATAACGAGGCAGTCCTGAAGTTGGATATTAAGGGACTTGCTGGAGGCAGA GCAGTGAGGTCCCTAAAAGGGAACAATGATGGGGATGGAGGAGTCGCTGA GGGGAATGGGAACTTAGGAGACGCTGAGGCTGGGGAAAACTAAGCAGGGA AGAGGACGTCCTGGGGGTTCACCCAGGCTTTGGGACAAGGGGCATAAGGT CAGAAGGGAAGGGAGCTGGAAGCTGAGCATATTCCGAAAGGGTGCCTGGG TCAGGGAGAGTAAAGGACCCTGAGGAAAATAGGATACAC
chr25	18896432	18896927	496	497	18896712	17	19.8098	11.1177	14.9735	C14_peak_216	Distal Intergenic	25	18826142	18835490	9349	1	508417	NM_001205637	70290	ENSBTAG00000018559	LYRM1	LYR motif containing 1
chr25	18903167	18903578	412	413	18903337	42	19.5664	5.42282	14.739	C14_peak_217	Distal Intergenic	25	18826142	18835490	9349	1	508417	NM_001205637	77025	ENSBTAG00000018559	LYRM1	LYR motif containing 1
chr25	18928956	18929179	224	225	18929153	17	22.9984	12.7919	18.0691	C14_peak_218	Distal Intergenic	25	18826142	18835490	9349	1	508417	NM_001205637	102814	ENSBTAG00000018559	LYRM1	LYR motif containing 1
chr25	18931649	18931945	297	298	18931722	17	19.6338	11.0184	14.8038	C14_peak_219	Distal Intergenic	25	18826142	18835490	9349	1	508417	NM_001205637	105507	ENSBTAG00000018559	LYRM1	LYR motif containing 1
chr25	19025495	19025860	366	367	19025549	8	5.81746	4.41594	1.84192	C14_peak_220	Distal Intergenic	25	19141197	19142589	1393	1	538444	NM_001038564	-115337	ENSBTAG00000020959	SET	SET nuclear proto-oncogene
chr25	19027713	19027946	234	235	19027810	12	9.38139	5.9927	5.02701	C14_peak_221	Distal Intergenic	25	19141197	19142589	1393	1	538444	NM_001038564	-113251	ENSBTAG00000020959	SET	SET nuclear proto-oncogene
chr25	19033684	19033878	195	196	19033797	13	13.3173	8.19133	8.74446	C14_peak_222	Distal Intergenic	25	19141197	19142589	1393	1	538444	NM_001038564	-107319	ENSBTAG00000020959	SET	SET nuclear proto-oncogene
chr25	30292490	30292713	224	225	30292677	8	7.08417	5.20834	2.91001	C14_peak_223	Distal Intergenic	25	29391800	29824281	432482	2	505622	NM_001192067	-468209	ENSBTAG00000008718	WBSCR17	Williams-Beuren syndrome chromosome region 17
chr25	30296043	30296272	230	231	30296126	20	29.2009	15.4529	24.121	C14_peak_224	Distal Intergenic	25	29391800	29824281	432482	2	505622	NM_001192067	-471762	ENSBTAG00000008718	WBSCR17	Williams-Beuren syndrome chromosome region 17
chr25	30305147	30305387	241	242	30305240	8	6.94459	5.1235	2.78874	C14_peak_225	Distal Intergenic	25	29391800	29824281	432482	2	505622	NM_001192067	-480866	ENSBTAG00000008718	WBSCR17	Williams-Beuren syndrome chromosome region 17
chr25	30306673	30306984	312	313	30306797	19	8.58372	4.27311	4.28317	C14_peak_226	Distal Intergenic	25	29391800	29824281	432482	2	505622	NM_001192067	-482392	ENSBTAG00000008718	WBSCR17	Williams-Beuren syndrome chromosome region 17
chr25	30307800	30308000	201	202	30307887	15	14.4628	8.44694	9.8335	C14_peak_227	Distal Intergenic	25	29391800	29824281	432482	2	505622	NM_001192067	-483519	ENSBTAG00000008718	WBSCR17	Williams-Beuren syndrome chromosome region 17
chr25	30316502	30316708	207	208	30316557	10	5.53173	3.94498	1.70514	C14_peak_228	Distal Intergenic	25	29391800	29824281	432482	2	505622	NM_001192067	-492221	ENSBTAG00000008718	WBSCR17	Williams-Beuren syndrome chromosome region 17
chr25	30337623	30337834	212	213	30337726	16	15.2241	8.66039	10.5581	C14_peak_229	Distal Intergenic	25	29391800	29824281	432482	2	505622	NM_001192067	-513342	ENSBTAG00000008718	WBSCR17	Williams-Beuren syndrome chromosome region 17
chr25	30350359	30350640	282	283	30350518	34	24.1453	8.54654	19.1871	C14_peak_230	Distal Intergenic	25	29391800	29824281	432482	2	505622	NM_001192067	-526078	ENSBTAG00000008718	WBSCR17	Williams-Beuren syndrome chromosome region 17
chr25	30354449	30354824	376	377	30354515	11	10.2751	6.7343	5.86513	C14_peak_231	Distal Intergenic	25	29391800	29824281	432482	2	505622	NM_001192067	-530168	ENSBTAG00000008718	WBSCR17	Williams-Beuren syndrome chromosome region 17
chr25	36122913	36123214	302	303	36123054	29	17.7775	6.76016	13.0066	C14_peak_232	Distal Intergenic	25	36180838	36185662	4825	2	768053	NM_001077110	62448	ENSBTAG00000014468	AP1S1	adaptor related protein complex 1 sigma 1 subunit
chr26	5355654	5355873	220	221	5355854	6	6.08395	4.71275	2.0817	C14_peak_233	Intron (NM_001099699/508067, intron 1 of 2)	26	5255001	5438031	183031	1	508067	NM_001099699	100653	ENSBTAG00000045893	C7H19orf52	chromosome 7 open reading frame, human C19orf52
chr26	10085015	10085227	213	214	10085205	11	10.9058	7.10973	6.46166	C14_peak_234	Intron (NM_001206063/534778, intron 3 of 6)	26	9932077	10211164	279088	2	534778	NM_001206063	125937	NA	RNLS	renalase, FAD dependent amine oxidase
chr26	21482149	21482346	198	199	21482235	20	22.7434	12.0587	17.8211	C14_peak_235	Distal Intergenic	26	21630816	21670833	40018	1	541239	NM_001102259	-148470	ENSBTAG00000012077	SLF2	SMC5-SMC6 complex localization factor 2
chr26	23355132	23355515	384	385	23355222	149	324.555	108.049	315.809	C14_peak_236	Intron (NM_001098083/535067, intron 2 of 10)	26	23535846	23549572	13727	1	782444	NM_001191476	-180331	ENSBTAG00000021071	TRIM8	tripartite motif containing 8
chr26	40478653	40479013	361	362	40478914	25	24.7114	11.6171	19.7403	C14_peak_237	Distal Intergenic	26	40346540	40380689	34150	1	508557	NM_001192959	132113	ENSBTAG00000007441	SEC23IP	SEC23 interacting protein
chr26	46909539	46909790	252	253	46909629	26	40.2007	19.868	34.826	C14_peak_238	Distal Intergenic	26	47184667	47184731	65	2	100313465	NR_031168	274941	NA	MIR2285C	microRNA 2285c
chr26	47089953	47090161	209	210	47090099	10	12.6383	8.09437	8.09682	C14_peak_239	Distal Intergenic	26	47184667	47184731	65	2	100313465	NR_031168	94570	NA	MIR2285C	microRNA 2285c
chr26	47090474	47090677	204	205	47090629	19	27.4334	14.717	22.3966	C14_peak_240	Distal Intergenic	26	47184667	47184731	65	2	100313465	NR_031168	94054	NA	MIR2285C	microRNA 2285c
chr26	48742845	48743071	227	228	48742902	5	5.47515	4.32614	1.70369	C14_peak_241	Distal Intergenic	26	47801389	47843307	41919	1	505285	NM_001205531	941456	ENSBTAG00000002435	PTPRE	protein tyrosine phosphatase, receptor type E
chr27	629120	629365	246	247	629333	37	40.037	15.9956	34.6747	C14_peak_242	Distal Intergenic	27	312538	376195	63658	1	524077	NM_001038140	316582	ENSBTAG00000009387	MYOM2	myomesin 2
chr27	2142157	2142362	206	207	2142231	6	6.10672	4.72501	2.09325	C14_peak_243	Distal Intergenic	27	312538	376195	63658	1	524077	NM_001038140	1829619	ENSBTAG00000009387	MYOM2	myomesin 2
chr27	6698620	6698837	218	219	6698784	22	32.7955	16.9246	27.6128	C14_peak_244	Intron (NM_001075744/516722, intron 2 of 6)	27	6674973	6683937	8965	2	497023	NM_001011677	-14683	ENSBTAG00000014141	SPATA4	spermatogenesis associated 4
chr27	6699209	6699403	195	196	6699298	15	14.8021	8.65178	10.1563	C14_peak_245	Intron (NM_001075744/516722, intron 2 of 6)	27	6674973	6683937	8965	2	497023	NM_001011677	-15272	ENSBTAG00000014141	SPATA4	spermatogenesis associated 4
chr27	7205619	7205984	366	367	7205707	36	59.7534	27.2265	53.975	C14_peak_246	Distal Intergenic	27	6999517	7084944	85428	2	282122	NM_174488	-120675	ENSBTAG00000014737	VEGFC	vascular endothelial growth factor C
chr27	8092518	8092905	388	389	8092731	6	6.94514	5.14723	2.78874	C14_peak_247	Distal Intergenic	27	7670459	7681822	11364	2	511345	NM_001075511	-410696	ENSBTAG00000017085	AGA	aspartylglucosaminidase
chr27	23706386	23706750	365	366	23706611	50	39.6342	11.2063	34.2872	C14_peak_248	Distal Intergenic	27	24193122	24209947	16826	1	540728	NM_001038192	-486372	ENSBTAG00000009685	ERI1	exoribonuclease 1
chr27	23720356	23720565	210	211	23720531	27	21.1172	8.91096	16.2448	C14_peak_249	Distal Intergenic	27	24193122	24209947	16826	1	540728	NM_001038192	-472557	ENSBTAG00000009685	ERI1	exoribonuclease 1
chr27	25153277	25153519	243	244	25153364	31	24.7826	9.68135	19.8103	C14_peak_250	Distal Intergenic	27	25391016	25416076	25061	2	515461	NM_001076856	262557	ENSBTAG00000013579	SARAF	store-operated calcium entry associated regulatory factor
chr27	25157225	25157446	222	223	25157381	17	16.2851	9.0412	11.5716	C14_peak_251	Distal Intergenic	27	25391016	25416076	25061	2	515461	NM_001076856	258630	ENSBTAG00000013579	SARAF	store-operated calcium entry associated regulatory factor
chr27	26327064	26327278	215	216	26327250	25	29.1174	14.2435	24.0427	C14_peak_252	Intron (NM_001143857/505061, intron 17 of 33)	27	26263003	26449795	186793	1	505061	NM_001143857	64061	ENSBTAG00000021592	WRN	Werner syndrome RecQ like helicase
chr27	26329042	26329257	216	217	26329134	9	9.91377	6.74475	5.52576	C14_peak_253	Intron (NM_001143857/505061, intron 17 of 33)	27	26263003	26449795	186793	1	505061	NM_001143857	66039	ENSBTAG00000021592	WRN	Werner syndrome RecQ like helicase
chr27	26337616	26337925	310	311	26337786	28	26.5083	11.6228	21.5008	C14_peak_254	Intron (NM_001143857/505061, intron 17 of 33)	27	26263003	26449795	186793	1	505061	NM_001143857	74613	ENSBTAG00000021592	WRN	Werner syndrome RecQ like helicase
chr27	26341596	26341806	211	212	26341677	27	15.1399	5.96517	10.4774	C14_peak_255	Intron (NM_001143857/505061, intron 17 of 33)	27	26263003	26449795	186793	1	505061	NM_001143857	78593	ENSBTAG00000021592	WRN	Werner syndrome RecQ like helicase
chr27	26342115	26342399	285	286	26342239	41	45.6459	17.5243	40.139	C14_peak_256	Intron (NM_001143857/505061, intron 17 of 33)	27	26263003	26449795	186793	1	505061	NM_001143857	79112	ENSBTAG00000021592	WRN	Werner syndrome RecQ like helicase
chr27	26347956	26348209	254	255	26348057	31	28.6103	11.7666	23.5458	C14_peak_257	Intron (NM_001143857/505061, intron 17 of 33)	27	26263003	26449795	186793	1	505061	NM_001143857	84953	ENSBTAG00000021592	WRN	Werner syndrome RecQ like helicase
chr27	26359061	26359261	201	202	26359157	21	18.6932	9.3316	13.8908	C14_peak_258	Intron (NM_001143857/505061, intron 17 of 33)	27	26263003	26449795	186793	1	505061	NM_001143857	96058	ENSBTAG00000021592	WRN	Werner syndrome RecQ like helicase
chr27	26363411	26363680	270	271	26363572	40	38.2891	13.8064	32.9859	C14_peak_259	Intron (NM_001143857/505061, intron 17 of 33)	27	26263003	26449795	186793	1	505061	NM_001143857	100408	ENSBTAG00000021592	WRN	Werner syndrome RecQ like helicase
chr27	26366310	26366520	211	212	26366408	43	33.0017	10.2288	27.8137	C14_peak_260	Intron (NM_001143857/505061, intron 17 of 33)	27	26263003	26449795	186793	1	505061	NM_001143857	103307	ENSBTAG00000021592	WRN	Werner syndrome RecQ like helicase
chr27	26367251	26367464	214	215	26367339	17	11.8407	6.36474	7.34445	C14_peak_261	Intron (NM_001143857/505061, intron 17 of 33)	27	26263003	26449795	186793	1	505061	NM_001143857	104248	ENSBTAG00000021592	WRN	Werner syndrome RecQ like helicase
chr27	26370194	26370389	196	197	26370330	15	14.7916	8.64548	10.1474	C14_peak_262	Intron (NM_001143857/505061, intron 17 of 33)	27	26263003	26449795	186793	1	505061	NM_001143857	107191	ENSBTAG00000021592	WRN	Werner syndrome RecQ like helicase
chr27	26380986	26381238	253	254	26381125	42	29.3151	8.89759	24.2327	C14_peak_263	Intron (NM_001143857/505061, intron 17 of 33)	27	26263003	26449795	186793	1	505061	NM_001143857	117983	ENSBTAG00000021592	WRN	Werner syndrome RecQ like helicase
chr27	26382001	26382217	217	218	26382090	20	14.5194	7.17251	9.88727	C14_peak_264	Intron (NM_001143857/505061, intron 17 of 33)	27	26263003	26449795	186793	1	505061	NM_001143857	118998	ENSBTAG00000021592	WRN	Werner syndrome RecQ like helicase
chr27	26383547	26383749	203	204	26383736	30	18.7295	6.98333	13.9263	C14_peak_265	Intron (NM_001143857/505061, intron 17 of 33)	27	26263003	26449795	186793	1	505061	NM_001143857	120544	ENSBTAG00000021592	WRN	Werner syndrome RecQ like helicase
chr27	26385946	26386195	250	251	26385991	8	5.16658	3.99569	1.5134	C14_peak_266	Intron (NM_001143857/505061, intron 17 of 33)	27	26263003	26449795	186793	1	505061	NM_001143857	122943	ENSBTAG00000021592	WRN	Werner syndrome RecQ like helicase
chr27	28486291	28486528	238	239	28486382	12	6.69617	4.341	2.6036	C14_peak_267	Intron (NM_001101920/510037, intron 5 of 5)	27	28415994	28427209	11216	2	535350	NM_001099069	-59082	ENSBTAG00000015463	TTI2	TELO2 interacting protein 2
chr27	28532769	28533044	276	277	28532938	11	7.95715	5.29589	3.71338	C14_peak_268	Intron (NM_001101920/510037, intron 5 of 5)	27	28415994	28427209	11216	2	535350	NM_001099069	-105560	ENSBTAG00000015463	TTI2	TELO2 interacting protein 2
chr27	28542897	28543103	207	208	28542972	23	9.40988	4.1274	5.05387	C14_peak_269	Intron (NM_001101920/510037, intron 5 of 5)	27	28415994	28427209	11216	2	535350	NM_001099069	-115688	ENSBTAG00000015463	TTI2	TELO2 interacting protein 2
chr27	28575193	28575411	219	220	28575340	28	40.9273	19.8669	35.5356	C14_peak_270	Intron (NM_001101920/510037, intron 5 of 5)	27	28415994	28427209	11216	2	535350	NM_001099069	-147984	ENSBTAG00000015463	TTI2	TELO2 interacting protein 2
chr27	28578781	28579009	229	230	28578872	21	22.5359	11.6416	17.6206	C14_peak_271	Intron (NM_001101920/510037, intron 5 of 5)	27	28415994	28427209	11216	2	535350	NM_001099069	-151572	ENSBTAG00000015463	TTI2	TELO2 interacting protein 2
chr27	28590627	28590900	274	275	28590752	18	21.6573	11.9359	16.7668	C14_peak_272	Intron (NM_001101920/510037, intron 5 of 5)	27	28415994	28427209	11216	2	535350	NM_001099069	-163418	ENSBTAG00000015463	TTI2	TELO2 interacting protein 2
chr27	28649126	28649453	328	329	28649382	12	13.2078	8.28597	8.64065	C14_peak_273	Intron (NM_001101920/510037, intron 5 of 5)	27	28415994	28427209	11216	2	535350	NM_001099069	-221917	ENSBTAG00000015463	TTI2	TELO2 interacting protein 2
chr27	28663564	28663974	411	412	28663653	25	29.4303	14.4273	24.3452	C14_peak_274	Intron (NM_001101920/510037, intron 5 of 5)	27	28415994	28427209	11216	2	535350	NM_001099069	-236355	ENSBTAG00000015463	TTI2	TELO2 interacting protein 2
chr27	28679070	28679432	363	364	28679171	28	13.3199	5.04698	8.74662	C14_peak_275	Intron (NM_001101920/510037, intron 5 of 5)	27	28415994	28427209	11216	2	535350	NM_001099069	-251861	ENSBTAG00000015463	TTI2	TELO2 interacting protein 2
chr27	28684356	28684567	212	213	28684386	10	5.69205	4.04476	1.73512	C14_peak_276	Intron (NM_001101920/510037, intron 5 of 5)	27	28415994	28427209	11216	2	535350	NM_001099069	-257147	ENSBTAG00000015463	TTI2	TELO2 interacting protein 2
chr27	28714044	28714303	260	261	28714250	25	31.7678	15.7723	26.6223	C14_peak_277	Intron (NM_001101920/510037, intron 5 of 5)	27	28449633	28947295	497663	2	510037	NM_001101920	232992	ENSBTAG00000016411	RNF122	ring finger protein 122
chr27	28731345	28731600	256	257	28731448	61	40.1615	8.9656	34.7961	C14_peak_278	Intron (NM_001101920/510037, intron 5 of 5)	27	28449633	28947295	497663	2	510037	NM_001101920	215695	ENSBTAG00000016411	RNF122	ring finger protein 122
chr27	28769581	28769790	210	211	28769780	36	31.3915	11.5587	26.2577	C14_peak_279	Intron (NM_001101920/510037, intron 5 of 5)	27	28449633	28947295	497663	2	510037	NM_001101920	177505	ENSBTAG00000016411	RNF122	ring finger protein 122
chr27	28819443	28819665	223	224	28819537	11	8.82026	5.83772	4.50404	C14_peak_280	Intron (NM_001101920/510037, intron 5 of 5)	27	28449633	28947295	497663	2	510037	NM_001101920	127630	ENSBTAG00000016411	RNF122	ring finger protein 122
chr27	28833242	28833471	230	231	28833333	26	33.1753	16.2593	27.9817	C14_peak_281	Intron (NM_001101920/510037, intron 5 of 5)	27	28449633	28947295	497663	2	510037	NM_001101920	113824	ENSBTAG00000016411	RNF122	ring finger protein 122
chr27	28848535	28848762	228	229	28848744	39	43.9795	17.4351	38.5108	C14_peak_282	Intron (NM_001101920/510037, intron 5 of 5)	27	28449633	28947295	497663	2	510037	NM_001101920	98533	ENSBTAG00000016411	RNF122	ring finger protein 122
chr27	28937397	28937644	248	249	28937490	27	42.093	20.6039	36.6623	C14_peak_283	Intron (NM_001101920/510037, intron 5 of 5)	27	28449633	28947295	497663	2	510037	NM_001101920	9651	ENSBTAG00000016411	RNF122	ring finger protein 122
chr27	28968595	28968814	220	221	28968730	5	5.66018	4.41511	1.70514	C14_peak_284	Promoter (1-2kb)	27	28963364	28969954	6591	2	533896	NM_001076004	1140	ENSBTAG00000016413	DUSP26	dual specificity phosphatase 26 (putative)	AGAAGAGATAAGAGGCGCTGAAGGAGGGGGACTGTTGCTACAATCCCCCC TGCCTGCAGCTCCCAGGGCAAGTCTCAAAGCATGGCCCTTCCCAGCTCCA CAGCTCAATGCGTGGTCCCCACTGTTCACAGAAAGTCAGGCACGTCTTCT CAGGCCCCTCATTGAGGACCCCCTTGTGCTAAATAGGGTCACTTGATTTC ACCAGCAACACAGGCGCTAA
chr27	30563879	30564099	221	222	30564044	14	14.4805	8.68057	9.8504	C14_peak_285	Intron (NM_001192518/520004, intron 1 of 16)	27	30421577	31075903	654327	1	520004	NM_001192518	142302	ENSBTAG00000010241	UNC5D	unc-5 netrin receptor D
chr27	30565832	30566233	402	403	30565920	66	78.5525	24.1046	72.3063	C14_peak_286	Intron (NM_001192518/520004, intron 1 of 16)	27	30421577	31075903	654327	1	520004	NM_001192518	144255	ENSBTAG00000010241	UNC5D	unc-5 netrin receptor D
chr27	32639478	32639678	201	202	32639633	5	5.20798	4.19168	1.54239	C14_peak_287	Distal Intergenic	27	32683065	32685824	2760	1	782419	NM_001191480	-43387	ENSBTAG00000013943	ZNF703	zinc finger protein 703
chr27	34760225	34760430	206	207	34760318	5	5.13277	4.15257	1.48274	C14_peak_288	Distal Intergenic	27	34686577	34699491	12915	1	506281	NM_001101866	73648	ENSBTAG00000020602	IDO1	indoleamine 2,3-dioxygenase 1
chr27	35834409	35834846	438	439	35834474	8	6.94459	5.1235	2.78874	C14_peak_289	Distal Intergenic	27	35900360	35943920	43561	2	282068	NM_174460	109074	ENSBTAG00000027625	SFRP1	secreted frizzled related protein 1
chr27	37446023	37446968	946	947	37446941	19	27.4334	14.717	22.3966	C14_peak_290	Distal Intergenic	27	37422653	37437163	14511	1	514490	NM_001098027	23370	ENSBTAG00000003649	POMK	protein-O-mannose kinase
chr27	37590330	37590689	360	361	37590406	10	7.93208	5.45865	3.68949	C14_peak_291	Distal Intergenic	27	37487662	37521134	33473	2	534094	NM_001099061	-69196	ENSBTAG00000025003	INTS10	integrator complex subunit 10
chr27	37606111	37606462	352	353	37606199	18	9.86495	5.06489	5.47926	C14_peak_292	Distal Intergenic	27	37487662	37521134	33473	2	534094	NM_001099061	-84977	ENSBTAG00000025003	INTS10	integrator complex subunit 10
chr27	37611802	37612027	226	227	37612004	24	27.2683	13.4889	22.2452	C14_peak_293	Distal Intergenic	27	37487662	37521134	33473	2	534094	NM_001099061	-90668	ENSBTAG00000025003	INTS10	integrator complex subunit 10
chr27	37613601	37613806	206	207	37613711	10	9.18819	6.23442	4.84759	C14_peak_294	Distal Intergenic	27	37487662	37521134	33473	2	534094	NM_001099061	-92467	ENSBTAG00000025003	INTS10	integrator complex subunit 10
chr27	37629471	37629797	327	328	37629606	14	16.2318	9.67578	11.5218	C14_peak_295	Distal Intergenic	27	37487662	37521134	33473	2	534094	NM_001099061	-108337	ENSBTAG00000025003	INTS10	integrator complex subunit 10
chr27	37639376	37639622	247	248	37639538	9	8.88636	6.17648	4.56384	C14_peak_296	Distal Intergenic	27	37487662	37521134	33473	2	534094	NM_001099061	-118242	ENSBTAG00000025003	INTS10	integrator complex subunit 10
chr27	43452482	43452760	279	280	43452632	55	56.6034	17.4943	50.9084	C14_peak_297	Distal Intergenic	27	42558021	42569249	11229	1	784326	NM_001191190	894461	ENSBTAG00000047930	UBE2E2	ubiquitin-conjugating enzyme E2E 2
chr27	43567575	43567861	287	288	43567742	37	44.6393	18.7032	39.1566	C14_peak_298	Distal Intergenic	27	42558021	42569249	11229	1	784326	NM_001191190	1009554	ENSBTAG00000047930	UBE2E2	ubiquitin-conjugating enzyme E2E 2
chr27	43570187	43570563	377	378	43570497	14	9.11912	5.41758	4.78291	C14_peak_299	Distal Intergenic	27	42558021	42569249	11229	1	784326	NM_001191190	1012166	ENSBTAG00000047930	UBE2E2	ubiquitin-conjugating enzyme E2E 2
chr27	43576126	43576342	217	218	43576218	22	9.43297	4.2576	5.07555	C14_peak_300	Distal Intergenic	27	42558021	42569249	11229	1	784326	NM_001191190	1018105	ENSBTAG00000047930	UBE2E2	ubiquitin-conjugating enzyme E2E 2
chr27	45264853	45265047	195	196	45264981	6	6.90197	5.1269	2.7822	C14_peak_301	Distal Intergenic	27	42558021	42569249	11229	1	784326	NM_001191190	2706832	ENSBTAG00000047930	UBE2E2	ubiquitin-conjugating enzyme E2E 2
chr28	2642105	2642312	208	209	2642197	20	10.0503	4.81997	5.65196	C14_peak_302	Distal Intergenic	28	3039643	3076691	37049	2	533927	NM_001076006	434379	ENSBTAG00000047434	TSNAX	translin associated factor X
chr28	6374288	6374484	197	198	6374381	5	5.13277	4.15257	1.48274	C14_peak_303	Distal Intergenic	28	6492389	6559858	67470	1	505563	NM_001075207	-117905	ENSBTAG00000004515	KCNK1	potassium two pore domain channel subfamily K member 1
chr28	11077990	11078395	406	407	11078324	11	8.33238	5.53172	4.04633	C14_peak_304	Distal Intergenic	28	10664110	10671377	7268	2	280965	NM_173975	-406613	ENSBTAG00000026085	ZP4	zona pellucida glycoprotein 4
chr28	17297684	17297878	195	196	17297787	24	18.186	8.16064	13.4058	C14_peak_305	Distal Intergenic	28	17356841	17415700	58860	2	100125281	NM_001103163	117822	ENSBTAG00000014484	TMEM26	transmembrane protein 26
chr28	17298408	17298955	548	549	17298827	11	13.837	8.67759	9.24157	C14_peak_306	Distal Intergenic	28	17356841	17415700	58860	2	100125281	NM_001103163	116745	ENSBTAG00000014484	TMEM26	transmembrane protein 26
chr28	24130112	24130306	195	196	24130208	7	7.69257	5.58891	3.47034	C14_peak_307	Intron (NM_001079638/780777, intron 13 of 17)	28	22418864	24299242	1880379	2	780777	NM_001079638	168936	ENSBTAG00000045699	CTNNA3	catenin alpha 3
chr28	38879209	38879724	516	517	38879277	6	6.16451	4.75592	2.14536	C14_peak_308	Distal Intergenic	28	39435546	39448964	13419	1	404143	NM_001034052	-555822	ENSBTAG00000032829	GHITM	growth hormone inducible transmembrane protein
chr28	39353680	39354179	500	501	39354061	13	15.4998	9.40843	10.8227	C14_peak_309	Distal Intergenic	28	39435546	39448964	13419	1	404143	NM_001034052	-81367	ENSBTAG00000032829	GHITM	growth hormone inducible transmembrane protein
chr28	40139686	40139906	221	222	40139784	20	16.5567	8.35581	11.8329	C14_peak_310	Distal Intergenic	28	39531571	39542180	10610	1	280911	NM_175775	608115	ENSBTAG00000015681	RGR	retinal G protein coupled receptor
chr28	40140689	40141141	453	454	40140769	24	7.61092	3.3487	3.39585	C14_peak_311a	Distal Intergenic	28	39531571	39542180	10610	1	280911	NM_175775	609118	ENSBTAG00000015681	RGR	retinal G protein coupled receptor
chr28	40140689	40141141	453	454	40141013	27	14.5102	5.69034	9.87832	C14_peak_311b	Distal Intergenic	28	39531571	39542180	10610	1	280911	NM_175775	609118	ENSBTAG00000015681	RGR	retinal G protein coupled receptor
chr28	43067110	43067314	205	206	43067290	16	11.9305	6.65516	7.43086	C14_peak_312	Distal Intergenic	28	43160797	43196195	35399	1	539941	NM_001192974	-93483	ENSBTAG00000007876	MAPK8	mitogen-activated protein kinase 8
chr29	195989	196213	225	226	196088	34	16.5747	5.43998	11.8503	C14_peak_313	Distal Intergenic	29	590732	644582	53851	2	528169	NM_001245925	448369	ENSBTAG00000012010	PANX1	pannexin 1
chr29	19400880	19401078	199	200	19400965	22	28.3759	14.7104	23.3166	C14_peak_314	Distal Intergenic	29	18684328	18780241	95914	1	533729	NM_001076898	716552	ENSBTAG00000010191	PAK1	p21 (RAC1) activated kinase 1
chr29	19406599	19406953	355	356	19406734	15	9.16995	5.24732	4.83091	C14_peak_315	Distal Intergenic	29	18684328	18780241	95914	1	533729	NM_001076898	722271	ENSBTAG00000010191	PAK1	p21 (RAC1) activated kinase 1
chr29	19408268	19408690	423	424	19408552	38	14.0448	4.21442	9.43836	C14_peak_316	Distal Intergenic	29	18684328	18780241	95914	1	533729	NM_001076898	723940	ENSBTAG00000010191	PAK1	p21 (RAC1) activated kinase 1
chr29	19409425	19409907	483	484	19409566	28	8.20344	3.25476	3.93884	C14_peak_317a	Distal Intergenic	29	18684328	18780241	95914	1	533729	NM_001076898	725097	ENSBTAG00000010191	PAK1	p21 (RAC1) activated kinase 1
chr29	19409425	19409907	483	484	19409734	27	7.63405	3.14253	3.41691	C14_peak_317b	Distal Intergenic	29	18684328	18780241	95914	1	533729	NM_001076898	725097	ENSBTAG00000010191	PAK1	p21 (RAC1) activated kinase 1
chr29	19446777	19447360	584	585	19447198	34	44.579	19.9282	39.0982	C14_peak_318	Distal Intergenic	29	18684328	18780241	95914	1	533729	NM_001076898	762449	ENSBTAG00000010191	PAK1	p21 (RAC1) activated kinase 1
chr29	22107734	22107961	228	229	22107816	27	37.2199	18.1906	31.9453	C14_peak_319	Distal Intergenic	29	22275085	22423775	148691	2	614840	NM_001105001	315814	ENSBTAG00000021654	GAS2	growth arrest specific 2
chr29	23769536	23769967	432	433	23769664	11	7.61536	5.08125	3.3997	C14_peak_320	Distal Intergenic	29	22783297	22868772	85476	2	100140158	NM_001168406	-900764	ENSBTAG00000019394	ANO5	anoctamin 5
chr29	30240426	30240629	204	205	30240615	48	35.9816	10.2046	30.7386	C14_peak_321	Intron (NM_001078085/618028, intron 13 of 14)	29	30073042	30112565	39524	1	404163	NM_205806	167384	ENSBTAG00000016506	ST3GAL4	ST3 beta-galactoside alpha-2,3-sialyltransferase 4
chr29	30241195	30241728	534	535	30241346	29	16.8854	6.36365	12.1493	C14_peak_322a	Intron (NM_001078085/618028, intron 13 of 14)	29	30073042	30112565	39524	1	404163	NM_205806	168153	ENSBTAG00000016506	ST3GAL4	ST3 beta-galactoside alpha-2,3-sialyltransferase 4
chr29	30241195	30241728	534	535	30241707	16	8.0745	4.46407	3.82036	C14_peak_322b	Intron (NM_001078085/618028, intron 13 of 14)	29	30073042	30112565	39524	1	404163	NM_205806	168153	ENSBTAG00000016506	ST3GAL4	ST3 beta-galactoside alpha-2,3-sialyltransferase 4
chr29	30243833	30244039	207	208	30243917	55	45.0247	12.0866	39.5374	C14_peak_323	Intron (NM_001078085/618028, intron 13 of 14)	29	30073042	30112565	39524	1	404163	NM_205806	170791	ENSBTAG00000016506	ST3GAL4	ST3 beta-galactoside alpha-2,3-sialyltransferase 4
chr29	30245064	30245433	370	371	30245408	51	39.5155	10.8905	34.1743	C14_peak_324	Intron (NM_001078085/618028, intron 13 of 14)	29	30073042	30112565	39524	1	404163	NM_205806	172022	ENSBTAG00000016506	ST3GAL4	ST3 beta-galactoside alpha-2,3-sialyltransferase 4
chr29	30248391	30248847	457	458	30248485	20	9.3052	4.46875	4.95605	C14_peak_325	Intron (NM_001078085/618028, intron 13 of 14)	29	30073042	30112565	39524	1	404163	NM_205806	175349	ENSBTAG00000016506	ST3GAL4	ST3 beta-galactoside alpha-2,3-sialyltransferase 4
chr29	30263843	30264091	249	250	30264064	71	39.5372	7.34379	34.1948	C14_peak_326	Intron (NM_001078085/618028, intron 13 of 14)	29	30073042	30112565	39524	1	404163	NM_205806	190801	ENSBTAG00000016506	ST3GAL4	ST3 beta-galactoside alpha-2,3-sialyltransferase 4
chr29	30269299	30269523	225	226	30269392	9	6.28375	4.5738	2.25348	C14_peak_327	Intron (NM_001078085/618028, intron 13 of 14)	29	30073042	30112565	39524	1	404163	NM_205806	196257	ENSBTAG00000016506	ST3GAL4	ST3 beta-galactoside alpha-2,3-sialyltransferase 4
chr29	30275397	30275651	255	256	30275481	47	45.265	14.8305	39.7679	C14_peak_328	Intron (NM_001078085/618028, intron 13 of 14)	29	30073042	30112565	39524	1	404163	NM_205806	202355	ENSBTAG00000016506	ST3GAL4	ST3 beta-galactoside alpha-2,3-sialyltransferase 4
chr29	30281374	30281752	379	380	30281474	115	20.9073	2.74876	16.0394	C14_peak_329	Intron (NM_001078085/618028, intron 13 of 14)	29	30073042	30112565	39524	1	404163	NM_205806	208332	ENSBTAG00000016506	ST3GAL4	ST3 beta-galactoside alpha-2,3-sialyltransferase 4
chr29	30289473	30289731	259	260	30289561	80	83.7904	20.424	77.4186	C14_peak_330	Intron (NM_001078085/618028, intron 13 of 14)	29	30073042	30112565	39524	1	404163	NM_205806	216431	ENSBTAG00000016506	ST3GAL4	ST3 beta-galactoside alpha-2,3-sialyltransferase 4
chr29	30296099	30296298	200	201	30296243	22	16.561	7.80172	11.8371	C14_peak_331	Intron (NM_001078085/618028, intron 13 of 14)	29	30073042	30112565	39524	1	404163	NM_205806	223057	ENSBTAG00000016506	ST3GAL4	ST3 beta-galactoside alpha-2,3-sialyltransferase 4
chr29	30296747	30297169	423	424	30296987	35	12.1486	3.91937	7.63787	C14_peak_332	Intron (NM_001078085/618028, intron 13 of 14)	29	30073042	30112565	39524	1	404163	NM_205806	223705	ENSBTAG00000016506	ST3GAL4	ST3 beta-galactoside alpha-2,3-sialyltransferase 4
chr29	30298540	30298763	224	225	30298629	30	20.5581	7.83291	15.7028	C14_peak_333	Intron (NM_001078085/618028, intron 13 of 14)	29	30073042	30112565	39524	1	404163	NM_205806	225498	ENSBTAG00000016506	ST3GAL4	ST3 beta-galactoside alpha-2,3-sialyltransferase 4
chr29	30303534	30303870	337	338	30303623	59	53.6063	14.5645	47.9611	C14_peak_334	Intron (NM_001078085/618028, intron 13 of 14)	29	30073042	30112565	39524	1	404163	NM_205806	230492	ENSBTAG00000016506	ST3GAL4	ST3 beta-galactoside alpha-2,3-sialyltransferase 4
chr29	30323420	30323843	424	425	30323554	64	55.609	13.8477	49.9298	C14_peak_335a	Intron (NM_001078085/618028, intron 13 of 14)	29	30073042	30112565	39524	1	404163	NM_205806	250378	ENSBTAG00000016506	ST3GAL4	ST3 beta-galactoside alpha-2,3-sialyltransferase 4
chr29	30323420	30323843	424	425	30323753	42	17.3765	4.78906	12.619	C14_peak_335b	Intron (NM_001078085/618028, intron 13 of 14)	29	30073042	30112565	39524	1	404163	NM_205806	250378	ENSBTAG00000016506	ST3GAL4	ST3 beta-galactoside alpha-2,3-sialyltransferase 4
chr29	30330372	30330673	302	303	30330542	40	29.9323	9.6554	24.8375	C14_peak_336	Intron (NM_001078085/618028, intron 13 of 14)	29	30073042	30112565	39524	1	404163	NM_205806	257330	ENSBTAG00000016506	ST3GAL4	ST3 beta-galactoside alpha-2,3-sialyltransferase 4
chr29	30339047	30339441	395	396	30339379	14	7.06437	4.23257	2.89257	C14_peak_337	Intron (NM_001078085/618028, intron 13 of 14)	29	30073042	30112565	39524	1	404163	NM_205806	266005	ENSBTAG00000016506	ST3GAL4	ST3 beta-galactoside alpha-2,3-sialyltransferase 4
chr29	30341209	30341407	199	200	30341370	36	27.662	9.68165	22.6185	C14_peak_338	Intron (NM_001078085/618028, intron 13 of 14)	29	30073042	30112565	39524	1	404163	NM_205806	268167	ENSBTAG00000016506	ST3GAL4	ST3 beta-galactoside alpha-2,3-sialyltransferase 4
chr29	30347545	30347747	203	204	30347628	74	54.3816	10.9544	48.7198	C14_peak_339	Intron (NM_001078085/618028, intron 13 of 14)	29	30073042	30112565	39524	1	404163	NM_205806	274503	ENSBTAG00000016506	ST3GAL4	ST3 beta-galactoside alpha-2,3-sialyltransferase 4
chr29	30348466	30348700	235	236	30348550	56	57.4785	17.5309	51.7633	C14_peak_340	Intron (NM_001078085/618028, intron 13 of 14)	29	30073042	30112565	39524	1	404163	NM_205806	275424	ENSBTAG00000016506	ST3GAL4	ST3 beta-galactoside alpha-2,3-sialyltransferase 4
chr29	30351997	30352241	245	246	30352125	85	94.6809	23.3535	88.1883	C14_peak_341	Intron (NM_001078085/618028, intron 13 of 14)	29	30073042	30112565	39524	1	404163	NM_205806	278955	ENSBTAG00000016506	ST3GAL4	ST3 beta-galactoside alpha-2,3-sialyltransferase 4
chr29	30382011	30382221	211	212	30382090	38	27.1806	8.93478	22.1612	C14_peak_342	Intron (NM_001078085/618028, intron 13 of 14)	29	30073042	30112565	39524	1	404163	NM_205806	308969	ENSBTAG00000016506	ST3GAL4	ST3 beta-galactoside alpha-2,3-sialyltransferase 4
chr29	30383787	30384004	218	219	30383989	38	35.8729	13.2472	30.6333	C14_peak_343	Intron (NM_001078085/618028, intron 13 of 14)	29	30073042	30112565	39524	1	404163	NM_205806	310745	ENSBTAG00000016506	ST3GAL4	ST3 beta-galactoside alpha-2,3-sialyltransferase 4
chr29	30385238	30385491	254	255	30385430	24	27.9368	13.8827	22.8864	C14_peak_344	Intron (NM_001078085/618028, intron 13 of 14)	29	30073042	30112565	39524	1	404163	NM_205806	312196	ENSBTAG00000016506	ST3GAL4	ST3 beta-galactoside alpha-2,3-sialyltransferase 4
chr29	30968301	30968789	489	490	30968415	33	22.5065	8.03252	17.5925	C14_peak_345a	Distal Intergenic	29	30128060	30886851	758792	2	618028	NM_001078085	-81450	ENSBTAG00000006804	KIRREL3	kin of IRRE like 3 (Drosophila)
chr29	30968301	30968789	489	490	30968697	30	23.4219	9.26543	18.4829	C14_peak_345b	Distal Intergenic	29	30128060	30886851	758792	2	618028	NM_001078085	-81450	ENSBTAG00000006804	KIRREL3	kin of IRRE like 3 (Drosophila)
chr29	31046713	31046927	215	216	31046840	15	17.6962	10.3208	12.9289	C14_peak_346	Distal Intergenic	29	30128060	30886851	758792	2	618028	NM_001078085	-159862	ENSBTAG00000006804	KIRREL3	kin of IRRE like 3 (Drosophila)
chr3	1019066	1019295	230	231	1019282	20	21.0988	11.0866	16.2268	C14_peak_347	Distal Intergenic	3	930875	1012734	81860	2	539387	NM_001076158	-6332	ENSBTAG00000002823	MPZL1	myelin protein zero like 1
chr3	1025406	1025873	468	469	1025633	15	14.6981	8.58917	10.0574	C14_peak_348	Distal Intergenic	3	930875	1012734	81860	2	539387	NM_001076158	-12672	ENSBTAG00000002823	MPZL1	myelin protein zero like 1
chr3	1030687	1030932	246	247	1030777	13	13.6114	8.36284	9.02612	C14_peak_349	Distal Intergenic	3	930875	1012734	81860	2	539387	NM_001076158	-17953	ENSBTAG00000002823	MPZL1	myelin protein zero like 1
chr3	13925363	13925593	231	232	13925447	18	14.3546	7.59853	9.73036	C14_peak_350	Distal Intergenic	3	13973123	13985542	12420	2	511219	NM_001105357	59949	ENSBTAG00000012348	LRRC71	leucine rich repeat containing 71
chr3	24175063	24175278	216	217	24175212	7	8.25695	5.86511	3.98883	C14_peak_351	Intron (NM_001034582/532903, intron 2 of 5)	3	24236815	24361922	125108	1	521974	NM_001079775	-61537	ENSBTAG00000007767	TBX15	T-box 15
chr3	32651697	32651896	200	201	32651878	20	19.2905	9.9975	14.4687	C14_peak_352	Distal Intergenic	3	32598406	32637230	38825	2	505040	NM_001034232	-14467	ENSBTAG00000006466	CD53	CD53 molecule
chr3	42154371	42154607	237	238	42154520	21	15.2805	7.34631	10.613	C14_peak_353	Distal Intergenic	3	42184097	42188752	4656	2	281135	NM_001013585	34145	ENSBTAG00000005990	S1PR1	sphingosine-1-phosphate receptor 1
chr3	47218821	47219068	248	249	47218961	17	17.6457	9.86089	12.8795	C14_peak_354	Distal Intergenic	3	46860039	46910656	50618	2	537341	NM_001110081	-308165	ENSBTAG00000008809	PTBP2	polypyrimidine tract binding protein 2
chr3	62279466	62279704	239	240	62279533	5	5.66018	4.41511	1.70514	C14_peak_355	Distal Intergenic	3	62644405	63355165	710761	2	281278	NM_181013	1075461	ENSBTAG00000012305	ADGRL2	adhesion G protein-coupled receptor L2
chr3	66900575	66900787	213	214	66900667	29	31.2789	14.0684	26.1462	C14_peak_356	Distal Intergenic	3	66795566	66895377	99812	2	518246	NM_001080279	-5198	ENSBTAG00000011733	GIPC2	GIPC PDZ domain containing family member 2
chr3	69797153	69797387	235	236	69797293	18	15.02	7.99779	10.3635	C14_peak_357	Intron (NM_001281916/530146, intron 9 of 21)	3	69625614	69837388	211775	1	530146	NM_001281916	171539	ENSBTAG00000001326	SLC44A5	solute carrier family 44 member 5
chr3	78863053	78863560	508	509	78863142	54	52.9629	16.0506	47.3304	C14_peak_358a	Distal Intergenic	3	78849545	78852524	2980	1	613480	NM_001206131	13508	NA	INSL5	insulin like 5
chr3	78863053	78863560	508	509	78863547	21	6.03379	3.00218	2.03732	C14_peak_358b	Distal Intergenic	3	78849545	78852524	2980	1	613480	NM_001206131	13508	NA	INSL5	insulin like 5
chr3	82825580	82825784	205	206	82825665	12	10.7856	6.86314	6.34761	C14_peak_359	Distal Intergenic	3	82486867	82545184	58318	2	510138	NM_001075432	-280396	ENSBTAG00000030706	ALG6	ALG6, alpha-1,3-glucosyltransferase
chr3	82830060	82830393	334	335	82830146	19	19.908	10.667	15.07	C14_peak_360	Distal Intergenic	3	82486867	82545184	58318	2	510138	NM_001075432	-284876	ENSBTAG00000030706	ALG6	ALG6, alpha-1,3-glucosyltransferase
chr3	82872412	82872646	235	236	82872602	11	11.3013	7.33956	6.8329	C14_peak_361	Distal Intergenic	3	82486867	82545184	58318	2	510138	NM_001075432	-327228	ENSBTAG00000030706	ALG6	ALG6, alpha-1,3-glucosyltransferase
chr3	91886184	91886434	251	252	91886288	60	35.3212	7.67579	30.0917	C14_peak_362	Distal Intergenic	3	91901853	91911965	10113	2	615670	NM_001193084	25531	ENSBTAG00000013241	BSND	barttin CLCNK type accessory beta subunit
chr4	11299030	11299428	399	400	11299124	12	10.2661	6.54305	5.85677	C14_peak_363	Distal Intergenic	4	11162347	11176872	14526	2	616526	NM_001099157	-122158	ENSBTAG00000003424	BET1	Bet1 golgi vesicular membrane trafficking protein
chr4	11307781	11308483	703	704	11307885	18	19.8013	10.8766	14.9659	C14_peak_364a	Distal Intergenic	4	11162347	11176872	14526	2	616526	NM_001099157	-130909	ENSBTAG00000003424	BET1	Bet1 golgi vesicular membrane trafficking protein
chr4	11307781	11308483	703	704	11308208	15	15.582	9.11702	10.9004	C14_peak_364b	Distal Intergenic	4	11162347	11176872	14526	2	616526	NM_001099157	-130909	ENSBTAG00000003424	BET1	Bet1 golgi vesicular membrane trafficking protein
chr4	15346995	15347193	199	200	15347080	5	5.56258	4.36861	1.70514	C14_peak_365	Distal Intergenic	4	15183826	15227665	43840	1	539417	NM_001076160	163169	ENSBTAG00000004995	C1GALT1	core 1 synthase, glycoprotein-N-acetylgalactosamine 3-beta-galactosyltransferase 1
chr4	18027168	18027388	221	222	18027342	6	5.72672	4.51536	1.75755	C14_peak_366	Distal Intergenic	4	17509342	17884255	374914	1	614571	NM_001034762	517826	ENSBTAG00000006924	NXPH1	neurexophilin 1
chr4	18957791	18958048	258	259	18957843	6	6.54938	4.95506	2.4746	C14_peak_367	Distal Intergenic	4	18973419	18980828	7410	2	327704	NM_175820	22780	ENSBTAG00000011145	NDUFA4	NDUFA4, mitochondrial complex associated
chr4	20667343	20667579	237	238	20667442	6	6.9531	5.15096	2.78874	C14_peak_368	Distal Intergenic	4	20296431	20297969	1539	1	767906	NM_001076985	370912	ENSBTAG00000002869	ARL4A	ADP ribosylation factor like GTPase 4A
chr4	27015651	27015850	200	201	27015741	5	5.66018	4.41511	1.70514	C14_peak_369	Distal Intergenic	4	26540376	26541499	1124	2	504248	NM_001102483	-474152	ENSBTAG00000033954	PRPS1L1	phosphoribosyl pyrophosphate synthetase 1-like 1
chr4	28966146	28966610	465	466	28966292	22	16.0339	7.50779	11.3336	C14_peak_370	Distal Intergenic	4	29124581	29216280	91700	1	536286	NM_001192875	-157971	ENSBTAG00000003709	ITGB8	integrin subunit beta 8
chr4	28969682	28969915	234	235	28969830	12	12.1651	7.69117	7.65349	C14_peak_371	Distal Intergenic	4	29124581	29216280	91700	1	536286	NM_001192875	-154666	ENSBTAG00000003709	ITGB8	integrin subunit beta 8
chr4	28986869	28987110	242	243	28986964	43	27.441	7.94272	22.4036	C14_peak_372	Distal Intergenic	4	29124581	29216280	91700	1	536286	NM_001192875	-137471	ENSBTAG00000003709	ITGB8	integrin subunit beta 8
chr4	28991297	28991511	215	216	28991421	30	39.4298	18.4731	34.0935	C14_peak_373	Distal Intergenic	4	29124581	29216280	91700	1	536286	NM_001192875	-133070	ENSBTAG00000003709	ITGB8	integrin subunit beta 8
chr4	28993780	28994043	264	265	28993934	6	6.32452	4.84015	2.29137	C14_peak_374	Distal Intergenic	4	29124581	29216280	91700	1	536286	NM_001192875	-130538	ENSBTAG00000003709	ITGB8	integrin subunit beta 8
chr4	29006243	29006500	258	259	29006456	18	17.7934	9.67926	13.0216	C14_peak_375	Distal Intergenic	4	29124581	29216280	91700	1	536286	NM_001192875	-118081	ENSBTAG00000003709	ITGB8	integrin subunit beta 8
chr4	30305722	30305963	242	243	30305926	5	5.44107	4.30939	1.68344	C14_peak_376	Distal Intergenic	4	30796235	30839424	43190	2	514631	NM_001104977	533461	ENSBTAG00000004976	CDCA7L	cell division cycle associated 7 like
chr4	33569718	33569995	278	279	33569902	9	5.46487	4.04944	1.69641	C14_peak_377	Intron (NM_001046238/518313, intron 1 of 21)	4	33518953	33763022	244070	1	518313	NM_001046238	50765	ENSBTAG00000004023	KIAA1324L	KIAA1324 like
chr4	41469954	41470266	313	314	41470063	15	6.13432	3.6043	2.1186	C14_peak_378	Distal Intergenic	4	41160158	41266152	105995	2	281790	NM_174324	-203802	ENSBTAG00000002714	GNAI1	G protein subunit alpha i1
chr4	41478802	41479024	223	224	41478961	12	12.3792	7.81585	7.85505	C14_peak_379	Distal Intergenic	4	41160158	41266152	105995	2	281790	NM_174324	-212650	ENSBTAG00000002714	GNAI1	G protein subunit alpha i1
chr4	41488771	41488967	197	198	41488864	28	10.1425	3.88449	5.73816	C14_peak_380	Distal Intergenic	4	41160158	41266152	105995	2	281790	NM_174324	-222619	ENSBTAG00000002714	GNAI1	G protein subunit alpha i1
chr4	48358701	48358917	217	218	48358766	6	6.9531	5.15096	2.78874	C14_peak_381	Distal Intergenic	4	48435188	48534701	99514	1	282463	NM_174649	-76271	ENSBTAG00000014958	PRKAR2B	protein kinase cAMP-dependent type II regulatory subunit beta
chr4	51995525	51995721	197	198	51995608	20	22.6796	12.0215	17.7588	C14_peak_382	Intron (NM_001012999/280855, intron 20 of 21)	4	51912651	52042198	129548	2	280855	NM_001012999	46477	ENSBTAG00000006161	MET	MET proto-oncogene, receptor tyrosine kinase
chr4	55462693	55463072	380	381	55462785	12	9.98055	6.36595	5.5891	C14_peak_383	Distal Intergenic	4	55612195	55614016	1822	1	100847946	NR_046270	-149123	ENSBTAG00000046823	LOC100847946	uncharacterized LOC100847946
chr4	57399659	57399888	230	231	57399767	24	27.5373	13.6478	22.4986	C14_peak_384	Distal Intergenic	4	56459731	56517537	57807	1	541075	NM_001078031	939928	ENSBTAG00000021967	TMEM168	transmembrane protein 168
chr4	57402803	57403010	208	209	57402942	12	9.86693	6.2953	5.48109	C14_peak_385	Distal Intergenic	4	56459731	56517537	57807	1	541075	NM_001078031	943072	ENSBTAG00000021967	TMEM168	transmembrane protein 168
chr4	57405199	57405569	371	372	57405287	9	8.73906	6.09119	4.42749	C14_peak_386	Distal Intergenic	4	56459731	56517537	57807	1	541075	NM_001078031	945468	ENSBTAG00000021967	TMEM168	transmembrane protein 168
chr4	57437666	57437862	197	198	57437762	7	5.86535	4.55422	1.88292	C14_peak_387	Distal Intergenic	4	56459731	56517537	57807	1	541075	NM_001078031	977935	ENSBTAG00000021967	TMEM168	transmembrane protein 168
chr4	66525142	66525375	234	235	66525341	22	21.9133	10.9496	17.0158	C14_peak_388	Distal Intergenic	4	66362577	66453938	91362	2	615645	NM_001105443	-71204	ENSBTAG00000000260	ZNRF2	zinc and ring finger 2
chr4	66534988	66535198	211	212	66535075	13	12.2226	7.53734	7.70656	C14_peak_389	Distal Intergenic	4	66362577	66453938	91362	2	615645	NM_001105443	-81050	ENSBTAG00000000260	ZNRF2	zinc and ring finger 2
chr4	66536202	66536487	286	287	66536298	15	5.98642	3.53034	1.99566	C14_peak_390	Distal Intergenic	4	66362577	66453938	91362	2	615645	NM_001105443	-82264	ENSBTAG00000000260	ZNRF2	zinc and ring finger 2
chr4	66543728	66543989	262	263	66543899	20	24.4198	13.016	19.4563	C14_peak_391	Distal Intergenic	4	66362577	66453938	91362	2	615645	NM_001105443	-89790	ENSBTAG00000000260	ZNRF2	zinc and ring finger 2
chr4	81711735	81711960	226	227	81711860	52	35.8068	9.22379	30.5694	C14_peak_392	Intron (NM_001205431/511147, intron 7 of 13)	4	81642481	81644523	2043	1	509064	NM_001075389	69254	ENSBTAG00000018715	MPLKIP	M-phase specific PLK1 interacting protein
chr4	91625269	91625497	229	230	91625324	6	6.9531	5.15096	2.78874	C14_peak_393	Intron (NM_001206117/538360, intron 3 of 9)	4	92126804	92126899	96	2	100313072	NR_031341	501402	ENSBTAG00000030030	MIR592	microRNA 592
chr4	95740982	95741496	515	516	95741462	16	8.69414	4.79554	4.38552	C14_peak_394	Distal Intergenic	4	95807761	96016758	208998	1	508844	NM_001097999	-66265	ENSBTAG00000010437	MKLN1	muskelin 1
chr4	98715470	98715665	196	197	98715599	8	6.52872	4.86663	2.46516	C14_peak_395	Intron (NM_001192687/529920, intron 15 of 19)	4	98639420	98791780	152361	1	529920	NM_001192687	76050	ENSBTAG00000015773	LRGUK	leucine rich repeats and guanylate kinase domain containing
chr4	98733990	98734408	419	420	98734084	8	7.43778	5.41976	3.23396	C14_peak_396	Intron (NM_001192687/529920, intron 15 of 19)	4	98639420	98791780	152361	1	529920	NM_001192687	94570	ENSBTAG00000015773	LRGUK	leucine rich repeats and guanylate kinase domain containing
chr4	103639315	103639759	445	446	103639664	19	12.7967	6.44516	8.2451	C14_peak_397	Intron (NM_001193208/540792, intron 6 of 17)	4	103594501	103689157	94657	1	540792	NM_001193208	44814	ENSBTAG00000014021	UBN2	ubinuclein 2
chr4	103644795	103645066	272	273	103644841	8	5.61326	4.28464	1.70514	C14_peak_398	Intron (NM_001193208/540792, intron 6 of 17)	4	103594501	103689157	94657	1	540792	NM_001193208	50294	ENSBTAG00000014021	UBN2	ubinuclein 2
chr4	103646752	103646955	204	205	103646881	23	12.907	5.67002	8.35161	C14_peak_399	Intron (NM_001193208/540792, intron 6 of 17)	4	103594501	103689157	94657	1	540792	NM_001193208	52251	ENSBTAG00000014021	UBN2	ubinuclein 2
chr4	103648713	103648987	275	276	103648882	22	16.0339	7.50779	11.3336	C14_peak_400	Intron (NM_001193208/540792, intron 6 of 17)	4	103594501	103689157	94657	1	540792	NM_001193208	54212	ENSBTAG00000014021	UBN2	ubinuclein 2
chr4	103660639	103660895	257	258	103660879	71	102.117	34.7755	95.5784	C14_peak_401	Intron (NM_001193208/540792, intron 6 of 17)	4	103715432	103719743	4312	1	767923	NM_001076997	-54537	NA	FMC1	formation of mitochondrial complex V assembly factor 1 homolog
chr4	103662198	103662493	296	297	103662396	13	8.12808	5.02088	3.86949	C14_peak_402	Intron (NM_001193208/540792, intron 6 of 17)	4	103715432	103719743	4312	1	767923	NM_001076997	-52939	NA	FMC1	formation of mitochondrial complex V assembly factor 1 homolog
chr4	103662905	103663221	317	318	103663131	27	15.0816	5.93941	10.4231	C14_peak_403	Intron (NM_001193208/540792, intron 6 of 17)	4	103715432	103719743	4312	1	767923	NM_001076997	-52211	NA	FMC1	formation of mitochondrial complex V assembly factor 1 homolog
chr4	119795824	119796041	218	219	119796001	7	8.30336	5.88682	4.01971	C14_peak_404	Distal Intergenic	4	119541697	119541783	87	2	100313255	NR_031027	-254041	ENSBTAG00000029877	MIR153-2	microRNA 153-2
chr4	120820712	120821407	696	697	120821099	36	48.7534	21.5297	43.184	C14_peak_405	Distal Intergenic	4	120427002	120496083	69082	2	790124	NM_001206781	-324629	ENSBTAG00000037649	VIPR2	vasoactive intestinal peptide receptor 2
chr5	10960512	10960707	196	197	10960611	9	11.1507	7.35852	6.69146	C14_peak_406	Distal Intergenic	5	10731243	10905492	174250	1	531552	NM_001102137	229269	ENSBTAG00000018694	ACSS3	acyl-CoA synthetase short-chain family member 3
chr5	31317907	31318118	212	213	31317954	5	5.39917	4.28862	1.65075	C14_peak_407	Distal Intergenic	5	31347861	31349882	2022	1	281894	NM_174378	-29743	ENSBTAG00000005859	LALBA	lactalbumin alpha
chr5	68537799	68538004	206	207	68537848	5	5.47515	4.32614	1.70369	C14_peak_408	Intron (NM_001192668/528860, intron 2 of 2)	5	68385645	68645774	260130	1	528860	NM_001192668	152154	ENSBTAG00000010644	CHST11	carbohydrate sulfotransferase 11
chr5	76019096	76019383	288	289	76019186	6	6.5885	4.97463	2.50904	C14_peak_409	Distal Intergenic	5	75992618	75999893	7276	2	506413	NM_001101872	-19203	ENSBTAG00000008074	C1QTNF6	C1q and tumor necrosis factor related protein 6
chr5	97145813	97146033	221	222	97145913	10	9.65506	6.51311	5.28517	C14_peak_410	Distal Intergenic	5	97239157	97258624	19468	1	530502	NM_001075933	-93124	ENSBTAG00000004721	GSG1	germ cell associated 1
chr5	104372242	104372461	220	221	104372443	22	32.7955	16.9246	27.6128	C14_peak_411	Intron (NM_174674/282527, intron 1 of 10)	5	104364170	104397535	33366	1	282348	NM_174598	8072	ENSBTAG00000002631	SCNN1A	sodium channel epithelial 1 alpha subunit
chr5	111087320	111087554	235	236	111087366	5	4.9894	4.0765	1.36381	C14_peak_412	Exon (NM_001077845/504505, exon 7 of 8)	5	111073493	111088527	15035	1	504505	NM_001077845	13827	ENSBTAG00000007755	APOBEC3Z2	apolipoprotein B mRNA editing enzyme, catalytic polypeptide-like 3B
chr5	114135318	114135540	223	224	114135463	52	54.5812	17.6947	48.9163	C14_peak_413	Distal Intergenic	5	114009261	114024523	15263	2	515773	NM_001103250	-110795	ENSBTAG00000016516	CYB5R3	cytochrome b5 reductase 3
chr5	114151873	114152133	261	262	114152026	32	29.8941	12.1343	24.8001	C14_peak_414	Distal Intergenic	5	114009261	114024523	15263	2	515773	NM_001103250	-127350	ENSBTAG00000016516	CYB5R3	cytochrome b5 reductase 3
chr5	114185486	114185939	454	455	114185579	8	5.40288	4.14879	1.65354	C14_peak_415	Distal Intergenic	5	114291724	114341661	49938	2	532778	NM_001075974	155722	ENSBTAG00000001057	ARFGAP3	ADP ribosylation factor GTPase activating protein 3
chr5	114199074	114199317	244	245	114199212	45	32.1112	9.34841	26.9543	C14_peak_416	Distal Intergenic	5	114291724	114341661	49938	2	532778	NM_001075974	142344	ENSBTAG00000001057	ARFGAP3	ADP ribosylation factor GTPase activating protein 3
chr5	114202270	114202471	202	203	114202460	20	17.7326	9.05764	12.9634	C14_peak_417	Distal Intergenic	5	114291724	114341661	49938	2	532778	NM_001075974	139190	ENSBTAG00000001057	ARFGAP3	ADP ribosylation factor GTPase activating protein 3
chr5	114219556	114219782	227	228	114219767	12	11.0245	7.00913	6.57448	C14_peak_418	Distal Intergenic	5	114291724	114341661	49938	2	532778	NM_001075974	121879	ENSBTAG00000001057	ARFGAP3	ADP ribosylation factor GTPase activating protein 3
chr5	115980859	115981091	233	234	115980944	14	16.9884	10.0805	12.2483	C14_peak_419	Distal Intergenic	5	116021730	116048709	26980	1	788925	NM_001101305	-40639	ENSBTAG00000039784	PRR5	proline rich 5
chr5	115981840	115982259	420	421	115981932	15	18.1953	10.5894	13.4148	C14_peak_420	Distal Intergenic	5	116021730	116048709	26980	1	788925	NM_001101305	-39471	ENSBTAG00000039784	PRR5	proline rich 5
chr5	116296739	116296991	253	254	116296946	35	57.5247	26.393	51.8023	C14_peak_421	Distal Intergenic	5	116316367	116335303	18937	1	506836	NM_001038048	-19376	ENSBTAG00000017652	NUP50	nucleoporin 50
chr5	118497985	118498204	220	221	118498154	7	8.24463	5.85932	3.97786	C14_peak_422	Distal Intergenic	5	118347305	118347380	76	2	102466908	NR_107782	-150605	NA	MIR2285O-5	microRNA 2285o-5
chr6	5320426	5320645	220	221	5320608	29	6.81077	2.78625	2.70345	C14_peak_423	Distal Intergenic	6	5536135	5566460	30326	1	780876	NM_001079796	-215490	NA	LOC780876	MAD2 mitotic arrest deficient-like 1 (yeast)-like
chr6	5356339	5356869	531	532	5356506	98	48.074	6.52636	42.5172	C14_peak_424	Distal Intergenic	6	5536135	5566460	30326	1	780876	NM_001079796	-179266	NA	LOC780876	MAD2 mitotic arrest deficient-like 1 (yeast)-like
chr6	5417508	5417719	212	213	5417623	16	10.9909	6.09679	6.54218	C14_peak_425	Distal Intergenic	6	5536135	5566460	30326	1	780876	NM_001079796	-118416	NA	LOC780876	MAD2 mitotic arrest deficient-like 1 (yeast)-like
chr6	5593195	5593699	505	506	5593308	31	6.08528	2.50747	2.08293	C14_peak_426a	Distal Intergenic	6	5536135	5566460	30326	1	780876	NM_001079796	57060	NA	LOC780876	MAD2 mitotic arrest deficient-like 1 (yeast)-like
chr6	5593195	5593699	505	506	5593647	27	5.7806	2.58399	1.8081	C14_peak_426b	Distal Intergenic	6	5536135	5566460	30326	1	780876	NM_001079796	57060	NA	LOC780876	MAD2 mitotic arrest deficient-like 1 (yeast)-like
chr6	5838473	5838750	278	279	5838587	10	12.6383	8.09437	8.09682	C14_peak_427	Distal Intergenic	6	6013172	6020466	7295	1	337870	NM_001191513	-174422	ENSBTAG00000035319	MAD2L1	MAD2 mitotic arrest deficient-like 1 (yeast)
chr6	5905727	5905949	223	224	5905821	37	8.59824	2.88435	4.29681	C14_peak_428	Distal Intergenic	6	6013172	6020466	7295	1	337870	NM_001191513	-107223	ENSBTAG00000035319	MAD2L1	MAD2 mitotic arrest deficient-like 1 (yeast)
chr6	6187711	6187917	207	208	6187861	5	4.94031	4.05	1.32141	C14_peak_429	Distal Intergenic	6	6221300	6265330	44031	1	768011	NM_001077070	-33383	NA	MGC134093	uncharacterized protein MGC134093
chr6	6212469	6212673	205	206	6212584	45	13.3952	3.58517	8.81912	C14_peak_430	Distal Intergenic	6	6221300	6265330	44031	1	768011	NM_001077070	-8627	NA	MGC134093	uncharacterized protein MGC134093
chr6	6319224	6319681	458	459	6319297	13	12.4622	7.68232	7.93447	C14_peak_431	Distal Intergenic	6	6221300	6265330	44031	1	768011	NM_001077070	97924	NA	MGC134093	uncharacterized protein MGC134093
chr6	6545718	6546038	321	322	6545862	59	19.1733	4.00991	14.3559	C14_peak_432	Distal Intergenic	6	6221300	6265330	44031	1	768011	NM_001077070	324418	NA	MGC134093	uncharacterized protein MGC134093
chr6	6562456	6562770	315	316	6562616	117	26.3956	3.17965	21.3915	C14_peak_433	Distal Intergenic	6	6874055	7070187	196133	1	281972	NM_174417	-311285	ENSBTAG00000024888	PDE5A	phosphodiesterase 5A
chr6	6566662	6566907	246	247	6566752	22	8.41335	3.83575	4.12368	C14_peak_434	Distal Intergenic	6	6874055	7070187	196133	1	281972	NM_174417	-307148	ENSBTAG00000024888	PDE5A	phosphodiesterase 5A
chr6	6575429	6575672	244	245	6575535	30	8.01549	3.0756	3.76905	C14_peak_435	Distal Intergenic	6	6874055	7070187	196133	1	281972	NM_174417	-298383	ENSBTAG00000024888	PDE5A	phosphodiesterase 5A
chr6	6609937	6610285	349	350	6609996	31	5.77711	2.42892	1.80489	C14_peak_436	Distal Intergenic	6	6874055	7070187	196133	1	281972	NM_174417	-263770	ENSBTAG00000024888	PDE5A	phosphodiesterase 5A
chr6	7005244	7005793	550	551	7005523	52	31.6018	7.7821	26.4616	C14_peak_437	Intron (NM_174417/281972, intron 13 of 20)	6	7105047	7108888	3842	2	515768	NM_001025332	103095	ENSBTAG00000017045	FABP2	fatty acid binding protein 2, intestinal
chr6	8909278	8910032	755	756	8909434	47	28.3541	7.54117	23.2961	C14_peak_438	Distal Intergenic	6	8124491	8251738	127248	2	524136	NM_001077961	-657540	ENSBTAG00000007316	NDST3	N-deacetylase/N-sulfotransferase (heparan glucosaminyl) 3
chr6	17956096	17956303	208	209	17956182	14	12.3322	7.38283	7.81098	C14_peak_439	Distal Intergenic	6	17827884	17831767	3884	2	505603	NM_001206221	-124329	ENSBTAG00000014226	RPL34	ribosomal protein L34
chr6	17981425	17981681	257	258	17981608	19	20.7742	11.1815	15.9098	C14_peak_440	Distal Intergenic	6	17827884	17831767	3884	2	505603	NM_001206221	-149658	ENSBTAG00000014226	RPL34	ribosomal protein L34
chr6	17990364	17990602	239	240	17990454	13	16.1899	9.76221	11.4833	C14_peak_441	Distal Intergenic	6	17827884	17831767	3884	2	505603	NM_001206221	-158597	ENSBTAG00000014226	RPL34	ribosomal protein L34
chr6	19788765	19789047	283	284	19788906	10	8.84558	6.0261	4.527	C14_peak_442	Distal Intergenic	6	20111144	20138597	27454	2	505126	NM_001035018	349550	ENSBTAG00000004230	AIMP1	aminoacyl tRNA synthetase complex interacting multifunctional protein 1
chr6	19790256	19790476	221	222	19790344	36	21.1818	6.84919	16.307	C14_peak_443	Distal Intergenic	6	20111144	20138597	27454	2	505126	NM_001035018	348121	ENSBTAG00000004230	AIMP1	aminoacyl tRNA synthetase complex interacting multifunctional protein 1
chr6	19792476	19793114	639	640	19792853	12	11.85	7.50559	7.35305	C14_peak_444	Distal Intergenic	6	20111144	20138597	27454	2	505126	NM_001035018	345483	ENSBTAG00000004230	AIMP1	aminoacyl tRNA synthetase complex interacting multifunctional protein 1
chr6	19793523	19793724	202	203	19793635	10	6.7296	4.69804	2.63163	C14_peak_445	Distal Intergenic	6	20111144	20138597	27454	2	505126	NM_001035018	344873	ENSBTAG00000004230	AIMP1	aminoacyl tRNA synthetase complex interacting multifunctional protein 1
chr6	19800386	19800859	474	475	19800750	39	20.998	6.28431	16.1286	C14_peak_446	Distal Intergenic	6	20111144	20138597	27454	2	505126	NM_001035018	337738	ENSBTAG00000004230	AIMP1	aminoacyl tRNA synthetase complex interacting multifunctional protein 1
chr6	27305246	27305460	215	216	27305414	14	18.2849	10.7319	13.5007	C14_peak_447	Distal Intergenic	6	27333479	27512869	179391	1	538668	NM_001076119	-28019	ENSBTAG00000012343	TSPAN5	tetraspanin 5
chr6	27308930	27309228	299	300	27309158	6	6.63671	4.99858	2.5499	C14_peak_448	Distal Intergenic	6	27333479	27512869	179391	1	538668	NM_001076119	-24251	ENSBTAG00000012343	TSPAN5	tetraspanin 5
chr6	27322242	27322464	223	224	27322332	11	11.5945	7.50668	7.10919	C14_peak_449	Distal Intergenic	6	27333479	27512869	179391	1	538668	NM_001076119	-11015	ENSBTAG00000012343	TSPAN5	tetraspanin 5
chr6	45765755	45765949	195	196	45765851	7	5.16916	4.11586	1.51585	C14_peak_450	Distal Intergenic	6	45629615	45683587	53973	2	512327	NM_001098018	-82168	ENSBTAG00000008896	DHX15	DEAH-box helicase 15
chr6	56204507	56204733	227	228	56204608	16	13.2485	7.45373	8.67873	C14_peak_451	Distal Intergenic	6	58486550	58565111	78562	1	511424	NM_001104973	-2281817	ENSBTAG00000006643	C6H4orf19	chromosome 6 open reading frame, human C4orf19
chr6	56557721	56558087	367	368	56557877	23	29.4834	15.0642	24.3948	C14_peak_452	Distal Intergenic	6	58486550	58565111	78562	1	511424	NM_001104973	-1928463	ENSBTAG00000006643	C6H4orf19	chromosome 6 open reading frame, human C4orf19
chr6	56558776	56559267	492	493	56559067	36	59.7534	27.2265	53.975	C14_peak_453	Distal Intergenic	6	58486550	58565111	78562	1	511424	NM_001104973	-1927283	ENSBTAG00000006643	C6H4orf19	chromosome 6 open reading frame, human C4orf19
chr6	73540986	73541228	243	244	73541043	5	4.94031	4.05	1.32141	C14_peak_454	Distal Intergenic	6	73511906	73537572	25667	1	509430	NM_001192221	29080	ENSBTAG00000010593	SRP72	signal recognition particle 72
chr6	88825115	88825491	377	378	88825413	24	13.9903	5.99788	9.38604	C14_peak_455	Distal Intergenic	6	88695939	88739180	43242	2	530076	NM_001035380	-85935	ENSBTAG00000013718	GC	GC, vitamin D binding protein
chr6	89202196	89202629	434	435	89202515	62	22.3235	4.43465	17.4139	C14_peak_456	Intron (NM_001192797/534082, intron 17 of 21)	6	89162542	89460195	297654	2	534082	NM_001192797	257566	ENSBTAG00000006507	ADAMTS3	ADAM metallopeptidase with thrombospondin type 1 motif 3
chr6	89203136	89203643	508	509	89203236	47	12.8966	3.37878	8.34147	C14_peak_457	Intron (NM_001192797/534082, intron 17 of 21)	6	89162542	89460195	297654	2	534082	NM_001192797	256552	ENSBTAG00000006507	ADAMTS3	ADAM metallopeptidase with thrombospondin type 1 motif 3
chr6	89208907	89209131	225	226	89208991	62	59.5407	16.2161	53.7783	C14_peak_458	Intron (NM_001192797/534082, intron 17 of 21)	6	89162542	89460195	297654	2	534082	NM_001192797	251064	ENSBTAG00000006507	ADAMTS3	ADAM metallopeptidase with thrombospondin type 1 motif 3
chr6	89211637	89211839	203	204	89211755	83	22.6677	3.58619	17.7475	C14_peak_459	Intron (NM_001192797/534082, intron 17 of 21)	6	89162542	89460195	297654	2	534082	NM_001192797	248356	ENSBTAG00000006507	ADAMTS3	ADAM metallopeptidase with thrombospondin type 1 motif 3
chr6	89215495	89215701	207	208	89215637	36	30.0193	10.8489	24.9224	C14_peak_460	Intron (NM_001192797/534082, intron 17 of 21)	6	89162542	89460195	297654	2	534082	NM_001192797	244494	ENSBTAG00000006507	ADAMTS3	ADAM metallopeptidase with thrombospondin type 1 motif 3
chr6	89218332	89218911	580	581	89218419	51	72.1336	28.2212	66.048	C14_peak_461a	Intron (NM_001192797/534082, intron 17 of 21)	6	89162542	89460195	297654	2	534082	NM_001192797	241284	ENSBTAG00000006507	ADAMTS3	ADAM metallopeptidase with thrombospondin type 1 motif 3
chr6	89218332	89218911	580	581	89218885	32	40.1801	18.1621	34.8142	C14_peak_461b	Intron (NM_001192797/534082, intron 17 of 21)	6	89162542	89460195	297654	2	534082	NM_001192797	241284	ENSBTAG00000006507	ADAMTS3	ADAM metallopeptidase with thrombospondin type 1 motif 3
chr6	89219197	89219401	205	206	89219314	16	16.6998	9.54748	11.9689	C14_peak_462	Intron (NM_001192797/534082, intron 17 of 21)	6	89162542	89460195	297654	2	534082	NM_001192797	240794	ENSBTAG00000006507	ADAMTS3	ADAM metallopeptidase with thrombospondin type 1 motif 3
chr6	114728104	114728342	239	240	114728229	42	31.5203	9.83901	26.3824	C14_peak_463	Distal Intergenic	6	115276058	115404039	127982	1	540131	NM_001076201	-547716	ENSBTAG00000010343	C1QTNF7	C1q and tumor necrosis factor related protein 7
chr6	114730773	114731014	242	243	114730868	40	51.031	21.1378	45.4283	C14_peak_464	Distal Intergenic	6	115276058	115404039	127982	1	540131	NM_001076201	-545044	ENSBTAG00000010343	C1QTNF7	C1q and tumor necrosis factor related protein 7
chr7	5426951	5427163	213	214	5426997	5	4.94031	4.05	1.32141	C14_peak_465	Distal Intergenic	7	5335660	5367540	31881	2	527829	NM_001102114	-59411	ENSBTAG00000020709	MAP1S	microtubule associated protein 1S
chr7	12086099	12086302	204	205	12086189	13	13.8004	8.472	9.20696	C14_peak_466	Distal Intergenic	7	12325362	12329752	4391	1	338065	NM_176660	-239060	ENSBTAG00000012634	NDUFB7	NADH:ubiquinone oxidoreductase subunit B7
chr7	12102002	12102207	206	207	12102092	16	15.1394	8.60887	10.477	C14_peak_467	Distal Intergenic	7	12325362	12329752	4391	1	338065	NM_176660	-223155	ENSBTAG00000012634	NDUFB7	NADH:ubiquinone oxidoreductase subunit B7
chr7	12141496	12141732	237	238	12141585	9	7.37491	5.26534	3.17622	C14_peak_468	Distal Intergenic	7	12325362	12329752	4391	1	338065	NM_176660	-183630	ENSBTAG00000012634	NDUFB7	NADH:ubiquinone oxidoreductase subunit B7
chr7	18960056	18960265	210	211	18960137	41	68.9496	30.4309	62.9415	C14_peak_469	Promoter (<=1kb)	7	18960637	18964895	4259	1	533171	NM_001081530	-372	ENSBTAG00000047424	TRIP10	thyroid hormone receptor interactor 10	CGGGTGACCTCAGGGGGCTTCTCATGGTGGCTCTGAGAAGTCAGGGAAAC TGGAGGTGGGAGGGGCCTCTCGGCACTCCACTGGGTTTGGTGCATTGGAA GAGGGCCTCATCTCCAGTTGAGGCAGGAACCTCAGGGTTCCTCTGACTTC AGACTCCGATCGCAAGGTCCCTGCAGACTTGGGACAGGAGAGTCAGGCCT CGTCTTGGGC
chr7	34812968	34813195	228	229	34813097	37	11.3129	3.55194	6.84416	C14_peak_470	Distal Intergenic	7	35662599	35763607	101009	2	493643	NM_001007809	950412	ENSBTAG00000006978	HSD17B4	hydroxysteroid 17-beta dehydrogenase 4
chr7	51287618	51288014	397	398	51287938	9	7.10243	5.09435	2.9261	C14_peak_471	Intron (NM_001083747/540009, intron 4 of 7)	7	51278944	51308203	29260	2	540009	NM_001083747	20189	ENSBTAG00000005288	GFRA3	GDNF family receptor alpha 3
chr7	51288654	51288899	246	247	51288847	7	7.21403	5.33756	3.03102	C14_peak_472	Intron (NM_001083747/540009, intron 4 of 7)	7	51278944	51308203	29260	2	540009	NM_001083747	19304	ENSBTAG00000005288	GFRA3	GDNF family receptor alpha 3
chr7	51292331	51292557	227	228	51292454	7	7.08372	5.2665	2.9098	C14_peak_473	Intron (NM_001083747/540009, intron 4 of 7)	7	51278944	51308203	29260	2	540009	NM_001083747	15646	ENSBTAG00000005288	GFRA3	GDNF family receptor alpha 3
chr7	56584101	56584389	289	290	56584185	24	13.0253	5.54579	8.46439	C14_peak_474	Distal Intergenic	7	56231970	56350496	118527	2	281946	NM_001206634	-233605	ENSBTAG00000019472	NR3C1	nuclear receptor subfamily 3 group C member 1
chr7	56588212	56588483	272	273	56588362	22	11.0518	4.9728	6.60057	C14_peak_475	Distal Intergenic	7	56231970	56350496	118527	2	281946	NM_001206634	-237716	ENSBTAG00000019472	NR3C1	nuclear receptor subfamily 3 group C member 1
chr7	56589884	56590087	204	205	56589968	50	37.6065	10.3679	32.3227	C14_peak_476	Distal Intergenic	7	56231970	56350496	118527	2	281946	NM_001206634	-239388	ENSBTAG00000019472	NR3C1	nuclear receptor subfamily 3 group C member 1
chr7	56591146	56591490	345	346	56591213	34	19.9726	6.73146	15.1329	C14_peak_477	Distal Intergenic	7	56231970	56350496	118527	2	281946	NM_001206634	-240650	ENSBTAG00000019472	NR3C1	nuclear receptor subfamily 3 group C member 1
chr7	56606087	56606321	235	236	56606308	62	57.4684	15.2777	51.7542	C14_peak_478	Distal Intergenic	7	56231970	56350496	118527	2	281946	NM_001206634	-255591	ENSBTAG00000019472	NR3C1	nuclear receptor subfamily 3 group C member 1
chr7	56618607	56618851	245	246	56618721	77	73.4155	17.0428	67.3057	C14_peak_479	Distal Intergenic	7	56231970	56350496	118527	2	281946	NM_001206634	-268111	ENSBTAG00000019472	NR3C1	nuclear receptor subfamily 3 group C member 1
chr7	56620261	56620554	294	295	56620498	16	5.60375	3.24016	1.70514	C14_peak_480	Distal Intergenic	7	56231970	56350496	118527	2	281946	NM_001206634	-269765	ENSBTAG00000019472	NR3C1	nuclear receptor subfamily 3 group C member 1
chr7	56621736	56622010	275	276	56621989	61	38.2599	8.382	32.957	C14_peak_481	Distal Intergenic	7	56231970	56350496	118527	2	281946	NM_001206634	-271240	ENSBTAG00000019472	NR3C1	nuclear receptor subfamily 3 group C member 1
chr7	67754297	67754521	225	226	67754352	5	5.01736	4.09149	1.39038	C14_peak_482	Distal Intergenic	7	67737274	67745739	8466	2	533462	NM_001191372	-8558	ENSBTAG00000004000	SAP30L	SAP30 like
chr7	71963322	71963528	207	208	71963404	21	19.5239	9.82981	14.6976	C14_peak_483	Distal Intergenic	7	71421945	71479026	57082	2	538540	NM_001105417	-484296	ENSBTAG00000016199	CLINT1	clathrin interactor 1
chr7	93164173	93164386	214	215	93164285	11	8.62093	5.71286	4.3162	C14_peak_484	Distal Intergenic	7	93240416	93253094	12679	2	541123	NM_001076257	88708	ENSBTAG00000007116	ARRDC3	arrestin domain containing 3
chr7	105824032	105824259	228	229	105824192	12	10.0329	6.39845	5.63597	C14_peak_485	Distal Intergenic	7	105030976	105045004	14029	2	617720	NM_001046608	-779028	ENSBTAG00000027728	NUDT12	nudix hydrolase 12
chr7	105837473	105837696	224	225	105837561	9	8.06887	5.69278	3.81498	C14_peak_486	Distal Intergenic	7	105030976	105045004	14029	2	617720	NM_001046608	-792469	ENSBTAG00000027728	NUDT12	nudix hydrolase 12
chr7	105839023	105839292	270	271	105839098	8	7.152	5.2493	2.97209	C14_peak_487	Distal Intergenic	7	105030976	105045004	14029	2	617720	NM_001046608	-794019	ENSBTAG00000027728	NUDT12	nudix hydrolase 12
chr7	105849701	105849900	200	201	105849787	18	16.8088	9.08224	12.0743	C14_peak_488	Distal Intergenic	7	105030976	105045004	14029	2	617720	NM_001046608	-804697	ENSBTAG00000027728	NUDT12	nudix hydrolase 12
chr7	105856694	105856898	205	206	105856878	47	26.5522	6.94111	21.5441	C14_peak_489	Distal Intergenic	7	105030976	105045004	14029	2	617720	NM_001046608	-811690	ENSBTAG00000027728	NUDT12	nudix hydrolase 12
chr7	105902715	105902912	198	199	105902854	29	31.9708	14.4803	26.817	C14_peak_490	Distal Intergenic	7	105030976	105045004	14029	2	617720	NM_001046608	-857711	ENSBTAG00000027728	NUDT12	nudix hydrolase 12
chr7	105905770	105906217	448	449	105905869	23	15.9109	7.18861	11.2146	C14_peak_491	Distal Intergenic	7	105030976	105045004	14029	2	617720	NM_001046608	-860766	ENSBTAG00000027728	NUDT12	nudix hydrolase 12
chr7	105932269	105932498	230	231	105932435	17	17.0482	9.50281	12.3034	C14_peak_492	Distal Intergenic	7	105030976	105045004	14029	2	617720	NM_001046608	-887265	ENSBTAG00000027728	NUDT12	nudix hydrolase 12
chr8	4694977	4695174	198	199	4695070	6	6.9531	5.15096	2.78874	C14_peak_493	Intron (NM_001191298/615819, intron 4 of 11)	8	3816704	5330615	1513912	1	615819	NM_001191298	878273	ENSBTAG00000035007	GALNTL6	polypeptide N-acetylgalactosaminyltransferase-like 6
chr8	6205304	6205619	316	317	6205463	27	16.1195	6.4068	11.4163	C14_peak_494	Distal Intergenic	8	6410065	6449539	39475	2	538528	NM_001015667	243920	ENSBTAG00000006715	FBXO8	F-box protein 8
chr8	10719053	10719269	217	218	10719143	5	5.66018	4.41511	1.70514	C14_peak_495	Intron (NM_001102499/516087, intron 3 of 8)	8	10662268	10796380	134113	1	516087	NM_001102499	56785	ENSBTAG00000019636	SCARA5	scavenger receptor class A member 5
chr8	11939034	11939241	208	209	11939171	18	15.02	7.99779	10.3635	C14_peak_496	Distal Intergenic	8	11480116	11543046	62931	2	512995	NM_001075591	-395988	ENSBTAG00000000555	ACO1	aconitase 1
chr8	11951739	11951949	211	212	11951934	15	11.3544	6.54547	6.88384	C14_peak_497	Distal Intergenic	8	11480116	11543046	62931	2	512995	NM_001075591	-408693	ENSBTAG00000000555	ACO1	aconitase 1
chr8	11968829	11969034	206	207	11968917	11	11.1767	7.26765	6.71557	C14_peak_498	Distal Intergenic	8	11480116	11543046	62931	2	512995	NM_001075591	-425783	ENSBTAG00000000555	ACO1	aconitase 1
chr8	11970758	11971293	536	537	11970952	12	14.8182	9.13359	10.1717	C14_peak_499	Distal Intergenic	8	11480116	11543046	62931	2	512995	NM_001075591	-427712	ENSBTAG00000000555	ACO1	aconitase 1
chr8	24886026	24886230	205	206	24886115	14	13.4189	8.04652	8.8414	C14_peak_500	Distal Intergenic	8	24830047	24856903	26857	2	540732	NM_001192775	-29123	ENSBTAG00000010821	ACER2	alkaline ceramidase 2
chr8	24914814	24915010	197	198	24914910	11	6.52526	4.40266	2.462	C14_peak_501	Distal Intergenic	8	24927469	24930791	3323	1	787914	NM_001015548	-12459	ENSBTAG00000023462	RPS6	ribosomal protein S6
chr8	24918284	24918478	195	196	24918377	14	12.1388	7.26381	7.62848	C14_peak_502	Distal Intergenic	8	24927469	24930791	3323	1	787914	NM_001015548	-8991	ENSBTAG00000023462	RPS6	ribosomal protein S6
chr8	36103788	36104042	255	256	36103969	18	13.2583	6.95026	8.68802	C14_peak_503	Distal Intergenic	8	37291840	37292779	940	2	767934	NM_001077007	1188737	ENSBTAG00000015963	TMEM261	transmembrane protein 261
chr8	36112856	36113101	246	247	36112948	16	10.2688	5.67669	5.85898	C14_peak_504	Distal Intergenic	8	37291840	37292779	940	2	767934	NM_001077007	1179678	ENSBTAG00000015963	TMEM261	transmembrane protein 261
chr8	44634081	44634533	453	454	44634272	20	9.71098	4.65846	5.33178	C14_peak_505a	Distal Intergenic	8	44682699	44892129	209431	1	785045	NM_001102335	-48166	ENSBTAG00000033190	PGM5	phosphoglucomutase 5
chr8	44634081	44634533	453	454	44634443	28	13.7936	5.23497	9.20058	C14_peak_505b	Distal Intergenic	8	44682699	44892129	209431	1	785045	NM_001102335	-48166	ENSBTAG00000033190	PGM5	phosphoglucomutase 5
chr8	46913533	46913793	261	262	46913744	55	79.1479	30.2592	72.8677	C14_peak_506	Distal Intergenic	8	46883356	46907760	24405	2	539139	NM_001193214	-5773	ENSBTAG00000016229	KLF9	Kruppel like factor 9
chr8	46914148	46914428	281	282	46914305	83	68.9387	13.6587	62.9362	C14_peak_507	Distal Intergenic	8	46883356	46907760	24405	2	539139	NM_001193214	-6388	ENSBTAG00000016229	KLF9	Kruppel like factor 9
chr8	47084555	47084757	203	204	47084703	6	6.54938	4.95506	2.4746	C14_peak_508	Distal Intergenic	8	46941385	46941462	78	1	102465127	NR_107734	143170	NA	MIR2285I	microRNA 2285i
chr8	51366342	51366548	207	208	51366419	5	5.31659	4.2472	1.59473	C14_peak_509	Distal Intergenic	8	51440387	51501432	61046	1	281961	NM_174409	-73839	ENSBTAG00000002746	OSTF1	osteoclast stimulating factor 1
chr8	52124679	52124926	248	249	52124766	5	5.59849	4.38583	1.70514	C14_peak_510	Distal Intergenic	8	52806727	52852629	45903	1	281778	NM_177510	-681801	ENSBTAG00000012757	GCNT1	glucosaminyl (N-acetyl) transferase 1, core 2
chr8	56719932	56720286	355	356	56720028	16	7.35624	4.0918	3.15933	C14_peak_511	Distal Intergenic	8	55837381	55992437	155057	1	508893	NM_001081583	882551	ENSBTAG00000003532	TLE4	transducin like enhancer of split 4
chr8	56766821	56767052	232	233	56766909	14	13.5452	8.12289	8.96196	C14_peak_512	Distal Intergenic	8	55837381	55992437	155057	1	508893	NM_001081583	929440	ENSBTAG00000003532	TLE4	transducin like enhancer of split 4
chr8	56784969	56785281	313	314	56785065	15	6.20247	3.63858	2.17938	C14_peak_513	Distal Intergenic	8	55837381	55992437	155057	1	508893	NM_001081583	947588	ENSBTAG00000003532	TLE4	transducin like enhancer of split 4
chr8	56789884	56790419	536	537	56790028	11	9.3804	6.18666	5.02667	C14_peak_514	Distal Intergenic	8	55837381	55992437	155057	1	508893	NM_001081583	952503	ENSBTAG00000003532	TLE4	transducin like enhancer of split 4
chr8	61272279	61272518	240	241	61272492	21	14.6164	6.97752	9.98064	C14_peak_515	Distal Intergenic	8	61157469	61230549	73081	1	520088	NM_001111260	114810	ENSBTAG00000021686	MELK	maternal embryonic leucine zipper kinase
chr8	61274114	61274335	222	223	61274243	20	13.4925	6.59829	8.91168	C14_peak_516	Distal Intergenic	8	61157469	61230549	73081	1	520088	NM_001111260	116645	ENSBTAG00000021686	MELK	maternal embryonic leucine zipper kinase
chr8	61275528	61275845	318	319	61275727	43	39.9922	13.5946	34.6311	C14_peak_517	Distal Intergenic	8	61157469	61230549	73081	1	520088	NM_001111260	118059	ENSBTAG00000021686	MELK	maternal embryonic leucine zipper kinase
chr8	61281099	61281339	241	242	61281184	73	56.2141	11.753	50.5224	C14_peak_518	Distal Intergenic	8	61157469	61230549	73081	1	520088	NM_001111260	123630	ENSBTAG00000021686	MELK	maternal embryonic leucine zipper kinase
chr8	61283444	61283846	403	404	61283622	152	122.081	14.2099	115.449	C14_peak_519	Distal Intergenic	8	61157469	61230549	73081	1	520088	NM_001111260	125975	ENSBTAG00000021686	MELK	maternal embryonic leucine zipper kinase
chr8	64576862	64577068	207	208	64576908	5	5.28573	4.23154	1.59473	C14_peak_520	Intron (NM_174621/282382, intron 1 of 8)	8	64570093	64641796	71704	1	282382	NM_174621	6769	ENSBTAG00000018035	TGFBR1	transforming growth factor beta receptor 1
chr8	74508847	74509047	201	202	74509033	14	14.834	8.88716	10.1858	C14_peak_521	Distal Intergenic	8	74374393	74374459	67	2	100313446	NR_030918	-134388	NA	MIR2404-2	microRNA 2404-2
chr8	74521140	74521395	256	257	74521349	30	38.4952	17.9398	33.1829	C14_peak_522	Distal Intergenic	8	74374393	74374459	67	2	100313446	NR_030918	-146681	NA	MIR2404-2	microRNA 2404-2
chr8	74532394	74532811	418	419	74532490	20	8.48315	4.09599	4.18913	C14_peak_523	Distal Intergenic	8	74374393	74374459	67	2	100313446	NR_030918	-157935	NA	MIR2404-2	microRNA 2404-2
chr8	74540392	74540589	198	199	74540486	9	6.6604	4.81425	2.57139	C14_peak_524	Distal Intergenic	8	74374393	74374459	67	2	100313446	NR_030918	-165933	NA	MIR2404-2	microRNA 2404-2
chr8	74557565	74557798	234	235	74557703	14	18.3936	10.7839	13.6008	C14_peak_525	Distal Intergenic	8	74374393	74374459	67	2	100313446	NR_030918	-183106	NA	MIR2404-2	microRNA 2404-2
chr8	74558561	74558773	213	214	74558717	13	15.869	9.59977	11.1744	C14_peak_526	Distal Intergenic	8	74374393	74374459	67	2	100313446	NR_030918	-184102	NA	MIR2404-2	microRNA 2404-2
chr8	74600589	74600786	198	199	74600711	17	11.1311	5.9559	6.67771	C14_peak_527	Distal Intergenic	8	74374393	74374459	67	2	100313446	NR_030918	-226130	NA	MIR2404-2	microRNA 2404-2
chr8	74609597	74609802	206	207	74609694	8	8.87648	6.21726	4.55568	C14_peak_528	Distal Intergenic	8	74834628	74913332	78705	1	508045	NM_001191533	-224826	ENSBTAG00000018317	PPP2R2A	protein phosphatase 2 regulatory subunit Balpha
chr8	74640587	74641154	568	569	74640729	24	24.8722	12.0591	19.8985	C14_peak_529a	Distal Intergenic	8	74834628	74913332	78705	1	508045	NM_001191533	-193474	ENSBTAG00000018317	PPP2R2A	protein phosphatase 2 regulatory subunit Balpha
chr8	74640587	74641154	568	569	74641034	39	47.7463	19.6524	42.2026	C14_peak_529b	Distal Intergenic	8	74834628	74913332	78705	1	508045	NM_001191533	-193474	ENSBTAG00000018317	PPP2R2A	protein phosphatase 2 regulatory subunit Balpha
chr8	74699039	74699293	255	256	74699122	21	21.0186	10.7306	16.1488	C14_peak_530	Distal Intergenic	8	74834628	74913332	78705	1	508045	NM_001191533	-135335	ENSBTAG00000018317	PPP2R2A	protein phosphatase 2 regulatory subunit Balpha
chr8	74701575	74701778	204	205	74701681	19	17.3546	9.12509	12.5982	C14_peak_531	Distal Intergenic	8	74834628	74913332	78705	1	508045	NM_001191533	-132850	ENSBTAG00000018317	PPP2R2A	protein phosphatase 2 regulatory subunit Balpha
chr8	74719687	74720158	472	473	74719776	8	7.02427	5.17203	2.85587	C14_peak_532	Distal Intergenic	8	74834628	74913332	78705	1	508045	NM_001191533	-114470	ENSBTAG00000018317	PPP2R2A	protein phosphatase 2 regulatory subunit Balpha
chr8	74764083	74764279	197	198	74764169	18	14.3752	7.61084	9.75012	C14_peak_533	Distal Intergenic	8	74834628	74913332	78705	1	508045	NM_001191533	-70349	ENSBTAG00000018317	PPP2R2A	protein phosphatase 2 regulatory subunit Balpha
chr8	74792838	74793033	196	197	74793023	16	16.7734	9.59105	12.0398	C14_peak_534	Distal Intergenic	8	74834628	74913332	78705	1	508045	NM_001191533	-41595	ENSBTAG00000018317	PPP2R2A	protein phosphatase 2 regulatory subunit Balpha
chr8	74800689	74800899	211	212	74800817	11	12.5048	8.00634	7.97517	C14_peak_535	Distal Intergenic	8	74834628	74913332	78705	1	508045	NM_001191533	-33729	ENSBTAG00000018317	PPP2R2A	protein phosphatase 2 regulatory subunit Balpha
chr8	83240312	83240864	553	554	83240386	49	10.4171	2.82259	6	C14_peak_536a	Intron (NM_174316/281762, intron 14 of 21)	8	83242822	83253558	10737	2	281554	NM_001244608	12694	ENSBTAG00000031517	TSPY	testis specific protein, Y-linked 1
chr8	83240312	83240864	553	554	83240712	45	21.6163	5.68517	16.7285	C14_peak_536b	Intron (NM_174316/281762, intron 14 of 21)	8	83242822	83253558	10737	2	281554	NM_001244608	12694	ENSBTAG00000031517	TSPY	testis specific protein, Y-linked 1
chr8	83247123	83247340	218	219	83247260	17	17.9227	10.0256	13.1474	C14_peak_537	Intron (NM_174316/281762, intron 14 of 21)	8	83242822	83253558	10737	2	281554	NM_001244608	6218	ENSBTAG00000031517	TSPY	testis specific protein, Y-linked 1
chr8	83251557	83251752	196	197	83251645	23	17.7631	8.20255	12.9927	C14_peak_538	Promoter (1-2kb)	8	83242822	83253558	10737	2	281554	NM_001244608	1806	ENSBTAG00000031517	TSPY	testis specific protein, Y-linked 1	TAAAAGGTGGCTCCCAGGGTGATGAGTGTGGGTGTGCAAGCGTGTGGATGATGCACCTGCGGTGTCCACCCCAGTCTCCCCTGTCTGTCTGCAGGGTACAGGGCACGTCGATCCACTCCAGTCCACTGGTTCTGGGACTTTGAACGGGGAGCCCCCAGCCGCAGGCTGGACACCAGGAGCCTTAACTTTCTCAACT
chr8	89372649	89372867	219	220	89372729	28	32.8279	15.3677	27.6436	C14_peak_539	Distal Intergenic	8	90017446	90018996	1551	2	504939	NM_001045901	646129	ENSBTAG00000003033	GADD45G	growth arrest and DNA damage inducible gamma
chr8	89376976	89377213	238	239	89377071	52	39.1179	10.4781	33.7938	C14_peak_540	Distal Intergenic	8	90017446	90018996	1551	2	504939	NM_001045901	641783	ENSBTAG00000003033	GADD45G	growth arrest and DNA damage inducible gamma
chr8	89377616	89377811	196	197	89377710	33	17.6598	5.98883	12.8934	C14_peak_541	Distal Intergenic	8	90017446	90018996	1551	2	504939	NM_001045901	641185	ENSBTAG00000003033	GADD45G	growth arrest and DNA damage inducible gamma
chr8	110663260	110663454	195	196	110663412	20	13.9553	6.85494	9.3531	C14_peak_542	Distal Intergenic	8	110409332	110605777	196446	2	538990	NM_001015669	-57483	ENSBTAG00000015936	BRINP1	BMP/retinoic acid inducible neural specific 1
chr8	110680081	110680349	269	270	110680184	10	11.2222	7.39233	6.75806	C14_peak_543	Distal Intergenic	8	110409332	110605777	196446	2	538990	NM_001015669	-74304	ENSBTAG00000015936	BRINP1	BMP/retinoic acid inducible neural specific 1
chr8	110701512	110701713	202	203	110701710	19	18.5409	9.84377	13.7427	C14_peak_544	Distal Intergenic	8	110409332	110605777	196446	2	538990	NM_001015669	-95735	ENSBTAG00000015936	BRINP1	BMP/retinoic acid inducible neural specific 1
chr8	110703621	110703819	199	200	110703730	12	13.3641	8.3723	8.78904	C14_peak_545	Distal Intergenic	8	110409332	110605777	196446	2	538990	NM_001015669	-97844	ENSBTAG00000015936	BRINP1	BMP/retinoic acid inducible neural specific 1
chr8	110710308	110710541	234	235	110710529	10	9.93747	6.67837	5.54772	C14_peak_546	Distal Intergenic	8	110409332	110605777	196446	2	538990	NM_001015669	-104531	ENSBTAG00000015936	BRINP1	BMP/retinoic acid inducible neural specific 1
chr8	110734213	110734541	329	330	110734299	12	5.93519	3.89383	1.94683	C14_peak_547	Distal Intergenic	8	110409332	110605777	196446	2	538990	NM_001015669	-128436	ENSBTAG00000015936	BRINP1	BMP/retinoic acid inducible neural specific 1
chr8	113051428	113051632	205	206	113051584	7	7.04148	5.24323	2.87157	C14_peak_548	Intron (NM_001191328/613935, intron 4 of 8)	8	112962793	113085992	123200	2	615707	NM_001102290	34360	ENSBTAG00000008685	TRAPPC12	trafficking protein particle complex 12
chr9	20592475	20592682	208	209	20592571	6	5.72672	4.51536	1.75755	C14_peak_549	Distal Intergenic	9	19963214	20335161	371948	1	282150	NM_174507	629261	NA	BCKDHB	branched chain keto acid dehydrogenase E1 subunit beta
chr9	34410462	34410659	198	199	34410562	7	7.951	5.71816	3.70766	C14_peak_550	Distal Intergenic	9	34364851	34389670	24820	1	533724	NM_001034594	45611	ENSBTAG00000003878	ZUFSP	zinc finger with UFM1 specific peptidase domain
chr9	36495804	36496238	435	436	36496127	40	21.685	6.37255	16.7939	C14_peak_551	Distal Intergenic	9	36551274	36844171	292898	1	540355	NM_001076215	-55036	ENSBTAG00000000188	HS3ST5	heparan sulfate-glucosamine 3-sulfotransferase 5
chr9	44687839	44688193	355	356	44687997	51	21.121	4.95614	16.2486	C14_peak_552	Distal Intergenic	9	44355220	44377512	22293	2	538384	NM_001192936	-310327	ENSBTAG00000000816	PRDM1	PR/SET domain 1
chr9	45030515	45030711	197	198	45030692	10	7.4561	5.15841	3.25154	C14_peak_553	Distal Intergenic	9	45169675	45301786	132112	1	286818	NM_174772	-138964	ENSBTAG00000016281	PREP	prolyl endopeptidase
chr9	45061629	45061842	214	215	45061807	7	7.08372	5.2665	2.9098	C14_peak_554	Distal Intergenic	9	45169675	45301786	132112	1	286818	NM_174772	-107833	ENSBTAG00000016281	PREP	prolyl endopeptidase
chr9	50055683	50056410	728	729	50055778	14	14.7878	8.8603	10.1437	C14_peak_555a	Intron (NM_001206118/538416, intron 36 of 41)	9	50160697	50228919	68223	1	537223	NM_001192972	-104287	ENSBTAG00000002294	SIM1	single-minded family bHLH transcription factor 1
chr9	50055683	50056410	728	729	50056394	14	14.8365	8.88861	10.1875	C14_peak_555b	Intron (NM_001206118/538416, intron 36 of 41)	9	50160697	50228919	68223	1	537223	NM_001192972	-104287	ENSBTAG00000002294	SIM1	single-minded family bHLH transcription factor 1
chr9	53574361	53574579	219	220	53574457	18	7.46218	3.88061	3.25709	C14_peak_556	Distal Intergenic	9	53673441	53682099	8659	1	615440	NM_001083516	-98862	ENSBTAG00000003174	NDUFAF4	NADH:ubiquinone oxidoreductase complex assembly factor 4
chr9	53620537	53620762	226	227	53620632	76	13.8098	2.66833	9.21593	C14_peak_557	Distal Intergenic	9	53673441	53682099	8659	1	615440	NM_001083516	-52679	ENSBTAG00000003174	NDUFAF4	NADH:ubiquinone oxidoreductase complex assembly factor 4
chr9	90786876	90787094	219	220	90786968	7	7.59083	5.53676	3.37661	C14_peak_558	Distal Intergenic	9	90889142	90897699	8558	1	280956	NM_173970	-102048	ENSBTAG00000013400	VIP	vasoactive intestinal peptide
chrX	18978244	18978485	242	243	18978330	22	23.5777	11.9491	18.6342	C14_peak_577	Intron (NM_001078043/614260, intron 6 of 6)	30	18910529	18918493	7965	1	512036	NM_001205714	67715	ENSBTAG00000018090	ZNF449	zinc finger protein 449
chrX	19146686	19146917	232	233	19146834	23	22.6495	11.0634	17.7294	C14_peak_578	Distal Intergenic	30	18812295	19100123	287829	2	614260	NM_001078043	-46563	ENSBTAG00000022837	ZNF75D	zinc finger protein 75D
chrX	19154888	19155114	227	228	19154983	9	11.1507	7.35852	6.69146	C14_peak_579	Distal Intergenic	30	18812295	19100123	287829	2	614260	NM_001078043	-54765	ENSBTAG00000022837	ZNF75D	zinc finger protein 75D
chrX	19155797	19156010	214	215	19155887	7	8.30336	5.88682	4.01971	C14_peak_580	Distal Intergenic	30	18812295	19100123	287829	2	614260	NM_001078043	-55674	ENSBTAG00000022837	ZNF75D	zinc finger protein 75D
chrX	30971658	30971902	245	246	30971741	35	45.1014	19.8279	39.6113	C14_peak_581	Distal Intergenic	30	30989740	31029260	39521	1	613334	NM_001102262	-17838	ENSBTAG00000034045	FMR1NB	fragile X mental retardation 1 neighbor
chrX	30972361	30972617	257	258	30972488	68	53.5973	12.0083	47.9529	C14_peak_582	Distal Intergenic	30	30989740	31029260	39521	1	613334	NM_001102262	-17123	ENSBTAG00000034045	FMR1NB	fragile X mental retardation 1 neighbor
chrX	30973320	30973535	216	217	30973409	22	14.1386	6.48808	9.52663	C14_peak_583	Distal Intergenic	30	30989740	31029260	39521	1	613334	NM_001102262	-16205	ENSBTAG00000034045	FMR1NB	fragile X mental retardation 1 neighbor
chrX	30973750	30974149	400	401	30973839	14	9.99271	5.94436	5.60084	C14_peak_584	Distal Intergenic	30	30989740	31029260	39521	1	613334	NM_001102262	-15591	ENSBTAG00000034045	FMR1NB	fragile X mental retardation 1 neighbor
chrX	30975100	30975680	581	582	30975309	12	10.9006	6.93354	6.45833	C14_peak_585a	Distal Intergenic	30	30989740	31029260	39521	1	613334	NM_001102262	-14060	ENSBTAG00000034045	FMR1NB	fragile X mental retardation 1 neighbor
chrX	30975100	30975680	581	582	30975525	32	39.2435	17.6132	33.9167	C14_peak_585b	Distal Intergenic	30	30989740	31029260	39521	1	613334	NM_001102262	-14060	ENSBTAG00000034045	FMR1NB	fragile X mental retardation 1 neighbor
chrX	30977723	30977944	222	223	30977860	22	16.344	7.68023	11.6282	C14_peak_586	Distal Intergenic	30	30989740	31029260	39521	1	613334	NM_001102262	-11796	ENSBTAG00000034045	FMR1NB	fragile X mental retardation 1 neighbor
chrX	30978433	30978639	207	208	30978558	11	11.6849	7.55767	7.19445	C14_peak_587	Distal Intergenic	30	30989740	31029260	39521	1	613334	NM_001102262	-11101	ENSBTAG00000034045	FMR1NB	fragile X mental retardation 1 neighbor
chrX	83179690	83180007	318	319	83179936	17	10.1241	5.39146	5.72275	C14_peak_588	Distal Intergenic	30	83228463	83475077	246615	1	540666	NM_001076231	-48456	ENSBTAG00000046092	HDAC8	histone deacetylase 8
chrX	100104259	100104460	202	203	100104448	7	6.57532	4.97926	2.4982	C14_peak_589	Intron (NM_001046477/540426, intron 11 of 12)	30	100070405	100162454	92050	2	540426	NM_001046477	57994	ENSBTAG00000003418	MSN	moesin
chrX	108497445	108497688	244	245	108497590	23	9.3194	4.09082	4.96971	C14_peak_590	Distal Intergenic	30	108396795	108424453	27659	2	513520	NM_001098022	-72992	ENSBTAG00000017801	ATP6AP2	ATPase H+ transporting accessory protein 2
chrX	146177077	146177280	204	205	146177159	21	30.9886	16.1887	25.8609	C14_peak_591	Distal Intergenic	30	146050001	146099080	49080	1	785567	NM_001080363	127076	ENSBTAG00000015849	PNPLA4	patatin like phospholipase domain containing 4
chrX	146839526	146840065	540	541	146839588	9	9.37085	6.45052	5.01784	C14_peak_592	Intron (NM_001046595/617253, intron 3 of 3)	30	146775607	146843115	67509	1	617253	NM_001046595	63919	ENSBTAG00000000207	PUDP	pseudouridine 5'-phosphatase
chrX	147282160	147282423	264	265	147282246	10	7.8612	5.41407	3.62285	C14_peak_593	Distal Intergenic	30	146775607	146843115	67509	1	617253	NM_001046595	506553	ENSBTAG00000000207	PUDP	pseudouridine 5'-phosphatase
