# Supplementary material for: Dysregulation of the Acrosome Formation Network by 8-oxoguanine (8-oxoG) in Infertile Sperm: A Case Report with Advanced Techniques
Source: Int J Mol Sci. 2021 May 30;22(11):5857. doi: 10.3390/ijms22115857 (PMC8199233; doi:10.3390/ijms22115857)
Supplement: Supplementary file 1 [file ijms-22-05857-s001.zip › Suppl Table_03_2D PAGE spot intensity.xlsx]

## Sheet: Supp_03
Supplementary Table 3. Intensity of differentially expressed standard spots of C14 sperm proteins
SSP ID	MW	PI	Intesity		Ratio
			C13	C14	(C14/C13)
705	36.1874	4.11806	1	252.21	252.21
1301	16.5467	4.50531	1182.39	126.25	-9.36547
1503	24.0247	4.48246	1005.9	71	-14.1676
1802	50.6252	4.23119	1	175.98	175.98
3601	29.7444	4.89995	1	384.68	384.68
4505	20.4863	5.37808	1	573.55	573.55
5303	14.3085	5.84033	35.41	4.09	-8.6577
5503	20.4098	6.11397	17.98	2301.04	127.978
5508	20.3948	6.00414	10.22	2177.5	213.063
5510	20.367	5.94137	3.11	622.99	200.318
5701	39.2462	5.45851	1	326.35	326.35
6001	10.5042	6.5879	313.42	1	-313.42
6805	58.0431	6.6502	64.32	1	-64.32
7004	11.254	7.31504	1	110.97	110.97
7101	11.538	7.38195	1	731.31	731.31
7202	12.7239	7.01722	342.49	45.32	-7.55715
7203	12.5749	7.10251	526.83	47.81	-11.0192
7504	21.5459	6.88781	106.22	5.6	-18.9679
7711	38.14	7.31178	282.24	28.76	-9.81363
7801	50.0367	7.28302	1	119.41	119.41
8101	11.4107	8.05236	5.65	3668.76	649.338
8302	17.9783	8.25138	1	201.19	201.19
8504	23.3309	7.61163	470.39	48.12	-9.77535
2502	23.7315	4.82877	5821.97	3749.41	-1.55277
2503	23.8	4.7	1564.26	510.23	-3.06579
2701	34.8313	4.84679	54.47	422.68	7.75987
4001	10.8926	5.23393	295.03	117.73	-2.50599
4504	20.5184	5.31539	1	68.7	68.7
4801	60.7377	5.32128	8.82	447.33	50.7177
4804	60.6542	5.4003	17.34	502.16	28.9596
4805	60.5569	5.44201	31.23	291.64	9.33846
5003	8.5052	5.9884	22.36	333.69	14.9235
5603	33.1	6.1	53.26	225.29	4.23
5803	60.4501	5.73693	116.16	1076.11	9.26403
5804	60.4761	5.85448	97.2	2307.95	23.7443
5813	60.5602	5.61849	120.67	385.25	3.19259
6102	11.5333	6.6145	2962.07	24245.4	8.18529
6404	19.7004	6.29652	12.37	513.29	41.4947
6405	19.6858	6.48786	11.05	914.74	82.7819
6406	19.6977	6.67469	59.72	1751.67	29.3314
6601	25.686	6.34259	89.89	199.55	2.21994
6701	46.4864	6.35264	611.76	371.47	-1.64686
6711	46.3109	6.67316	540.69	141.99	-3.80794
7301	18.2512	6.79316	156.94	1507.81	9.60756
7302	14.3547	7.24863	41.15	1695.07	41.1925
7401	19.6543	6.76853	127.62	639.54	5.01128
7405	19.7441	7.32529	3688.2	7976.28	2.16265
7406	18.2889	7.40106	10.23	391.53	38.2727
7702	39.5741	6.76036	76.3	625.3	8.19528
7707	39.619	7.12503	541.98	2106.65	3.88695
7710	37.7001	7.07361	482.39	182.5	-2.64323
8401	19.7701	7.55998	1571.77	4123.6	2.62354
8402	18.3392	7.64534	1120.97	4163	3.71375
8405	19.8652	7.93125	4169.53	8922.36	2.1399
8407	19.8388	8.09852	3606.54	7431.9	2.06067
8801	49.9179	7.51928	57	165.51	2.90368
8803	48.7875	7.79676	97.38	247.4	2.54056
9309	14.6751	8.43223	123.52	661.11	5.35225
