# Supplementary material for: Dysregulation of the Acrosome Formation Network by 8-oxoguanine (8-oxoG) in Infertile Sperm: A Case Report with Advanced Techniques
Source: Int J Mol Sci. 2021 May 30;22(11):5857. doi: 10.3390/ijms22115857 (PMC8199233; doi:10.3390/ijms22115857)
Supplement: Supplementary file 1 [file ijms-22-05857-s001.zip › Suppl Table_04_Ab.xlsx]

## Sheet: Supp_04
Supplementary Table 4. Antibody information
Type	Host species	Against	Catalog	Company	Application
Monoclonal	Mouse	ZO1	33-9100	Invitrogen (Grand Island, NY, USA)	IF (1:400)
Monoclonal	Rabbit	Ki67	VP-RM04	Vector Laboratories (Burlingame, CA, USA)	IF (1:200)
Polyclonal	Rabbit	OXCT1	PA5-43183	Invitrogen (Grand Island, NY, USA)	IF (1:200)
Polyclonal	Rabbit	β-catenin	9562	Cell Signaling (Berverly, MA, USA)	IF (1:200)
Polyclonal	Rabbit	ACRBP	Ab64809	Abcam (Cambridge, MA, USA)	IF (1:200)
Donkey	Mouse IgG	FITC	715-096-150	Jackson Immunologicals (West Grove, PA, USA)	IF (1:400)
Donkey	Rabbit IgG	CY3	711-166-152	Jackson Immunologicals (West Grove, PA, USA)	IF (1:200)
Donkey	Rabbit IgG	FITC	711-096-152	Jackson Immunologicals (West Grove, PA, USA)	IF (1:200)
IF: Immunofluorescence
